# Supplementary material
Source: MDPI journal article supplement (https://www.mdpi.com/2306-5729/4/2/55)
Supplement: s1 [file s1]

## Sheet: Read me
This file contains data of fuel properties of torrefied pruned biomass of Paulownia Clon in Vitro 112 (Oxytree) the hybrid of Paulownia elongata x Paulownia fortunei. This “Read me” sheet is a guide on how to read the data with short information about each type of treatment. The second spreadsheet (“Oxytree biomass yield”) contains data about the oxytree biomass yield, energy densification ratio,…											Cultivation type symbol	Application of geotextile	Application of irrigation	Soil type
											S(G-)(I-)	-	-	S - sandy soil, classified as V soil class belonging to brunic arenosols
											S(G+)(I-)	+	-
											S(G-)(I+)	-	+
											S(G+)(I+)	+	+
											C(G+)(I-)	+	-	C - clay soil classified as Phaeozems
											C(G-)(I-)	-	-
											C(G+)(I+)	+	+
											C(G-)(I+)	-	+

## Sheet: Oxytree biomass yield
The table present values of mass yield, energy yield, and energy densification ratio of torrefied biomass. Temperatures 200-300 °C with intervals 20 °C in torrefaction time 20, 40 and 60 minutes were used.							The table presents pruned biomass yield, assuming 625 trees per hectare.
Cultivation, -	Temperature, C	Time, min	Mass yield, %	Energy yield, %	Energy densification ratio, -		Cultivation, -	Fresh mass, Mg·ha-1	Dry mass, Mg·ha-1
S(G-)(I-)	200	20	98.0393	92.1125	0.939547		S(G-)(I-)	0.48	0.14
S(G+)(I-)	200	20	98.1299	97.3305	0.991854		S(G+)(I-)	0.58	0.15
S(G-)(I+)	200	20	98.0564	98.3458	1.00295		S(G-)(I+)	0.49	0.13
S(G+)(I+)	200	20	98.1557	97.8143	0.996522		S(G+)(I+)	0.42	0.11
C(G+)(I-)	200	20	93.489	97.4203	1.04205		C(G+)(I-)	0.455	0.148
C(G-)(I-)	200	20	93.0754	97.6831	1.04951		C(G-)(I-)	0.518	0.148
C(G+)(I+)	200	20	94.5034	98.7951	1.04541		C(G+)(I+)	0.461	0.159
C(G-)(I+)	200	20	94.1307	98.3777	1.04512		C(G-)(I+)	0.522	0.137
S(G-)(I-)	200	40	94.4025	97.3387	1.0311
S(G+)(I-)	200	40	94.6415	93.086	0.983564
S(G-)(I+)	200	40	94.2738	95.3323	1.01123
S(G+)(I+)	200	40	94.4059	97.0086	1.02757
C(G+)(I-)	200	40	92.1661	95.5773	1.03701
C(G-)(I-)	200	40	92.6922	98.5716	1.06343
C(G+)(I+)	200	40	92.3299	98.8375	1.07048
C(G-)(I+)	200	40	91.9785	98.2667	1.06837
S(G-)(I-)	200	60	93.1465	94.9819	1.01971
S(G+)(I-)	200	60	92.7622	96.1727	1.03677
S(G-)(I+)	200	60	92.613	96.1719	1.03843
S(G+)(I+)	200	60	93.278	96.5891	1.0355
C(G+)(I-)	200	60	91.7459	96.2237	1.04881
C(G-)(I-)	200	60	90.7965	96.9402	1.06766
C(G+)(I+)	200	60	90.8854	96.8226	1.06533
C(G-)(I+)	200	60	90.3548	97.1172	1.07484
S(G-)(I-)	220	20	92.0306	92.5668	1.00583
S(G+)(I-)	220	20	91.8295	95.092	1.03553
S(G-)(I+)	220	20	92.2328	96.6105	1.04746
S(G+)(I+)	220	20	92.211	95.6903	1.03773
C(G+)(I-)	220	20	95.9424	96.4589	1.00538
C(G-)(I-)	220	20	96.5782	97.9051	1.01374
C(G+)(I+)	220	20	95.8176	98.5889	1.02892
C(G-)(I+)	220	20	96.2647	98.7004	1.0253
S(G-)(I-)	220	40	89.2216	90.7746	1.01741
S(G+)(I-)	220	40	88.7705	93.0457	1.04816
S(G-)(I+)	220	40	88.6607	93.5689	1.05536
S(G+)(I+)	220	40	88.3876	92.6719	1.04847
C(G+)(I-)	220	40	90.2883	93.4946	1.03551
C(G-)(I-)	220	40	89.6778	96.5832	1.077
C(G+)(I+)	220	40	88.1587	96.2182	1.09142
C(G-)(I+)	220	40	87.7242	94.0837	1.07249
S(G-)(I-)	220	60	90.2536	90.885	1.007
S(G+)(I-)	220	60	89.6678	93.8011	1.0461
S(G-)(I+)	220	60	88.0506	93.0893	1.05722
S(G+)(I+)	220	60	87.7085	92.5493	1.05519
C(G+)(I-)	220	60	88.3445	94.2665	1.06703
C(G-)(I-)	220	60	87.3501	95.2603	1.09056
C(G+)(I+)	220	60	85.8015	93.0482	1.08446
C(G-)(I+)	220	60	85.4946	93.5278	1.09396
S(G-)(I-)	240	20	92.8826	93.5527	1.00721
S(G+)(I-)	240	20	92.7239	95.396	1.02882
S(G-)(I+)	240	20	92.2775	95.4926	1.03484
S(G+)(I+)	240	20	92.7627	95.8098	1.03285
C(G+)(I-)	240	20	85.0784	91.9986	1.08134
C(G-)(I-)	240	20	82.1252	90.2988	1.09953
C(G+)(I+)	240	20	79.6645	89.4264	1.12254
C(G-)(I+)	240	20	81.7393	91.6813	1.12163
S(G-)(I-)	240	40	82.9555	87.222	1.05143
S(G+)(I-)	240	40	83.4396	89.5676	1.07344
S(G-)(I+)	240	40	80.8886	86.6438	1.07115
S(G+)(I+)	240	40	78.5912	84.9213	1.08054
C(G+)(I-)	240	40	82.194	89.6457	1.09066
C(G-)(I-)	240	40	81.5298	90.7943	1.11363
C(G+)(I+)	240	40	72.6024	83.8447	1.15485
C(G-)(I+)	240	40	74.682	85.5731	1.14583
S(G-)(I-)	240	60	78.9037	82.5382	1.04606
S(G+)(I-)	240	60	78.8816	85.7916	1.0876
S(G-)(I+)	240	60	70.7805	79.1684	1.11851
S(G+)(I+)	240	60	73.3425	80.9111	1.10319
C(G+)(I-)	240	60	81.4998	89.9736	1.10397
C(G-)(I-)	240	60	81.2884	90.7741	1.11669
C(G+)(I+)	240	60	77.8996	92.7923	1.19118
C(G-)(I+)	240	60	77.4946	88.537	1.14249
S(G-)(I-)	260	20	89.0905	92.4864	1.03812
S(G+)(I-)	260	20	87.8666	92.0604	1.04773
S(G-)(I+)	260	20	87.6141	93.3274	1.06521
S(G+)(I+)	260	20	87.7086	93.3523	1.06435
C(G+)(I-)	260	20	90.106	94.5103	1.04888
C(G-)(I-)	260	20	89.4182	95.663	1.06984
C(G+)(I+)	260	20	87.2771	94.2586	1.07999
C(G-)(I+)	260	20	87.3157	95.5345	1.09413
S(G-)(I-)	260	40	72.8289	78.8105	1.08213
S(G+)(I-)	260	40	72.2795	80.7187	1.11676
S(G-)(I+)	260	40	69.4176	78.1406	1.12566
S(G+)(I+)	260	40	69.2678	78.64	1.1353
C(G+)(I-)	260	40	75.286	84.8544	1.12709
C(G-)(I-)	260	40	77.2486	88.7383	1.14874
C(G+)(I+)	260	40	68.9277	80.7774	1.17192
C(G-)(I+)	260	40	70.0322	82.2535	1.17451
S(G-)(I-)	260	60	65.9118	73.9761	1.12235
S(G+)(I-)	260	60	63.4734	72.1565	1.1368
S(G-)(I+)	260	60	59.7928	68.2386	1.14125
S(G+)(I+)	260	60	59.993	68.9189	1.14878
C(G+)(I-)	260	60	70.2003	80.7631	1.15047
C(G-)(I-)	260	60	68.6367	79.7393	1.16176
C(G+)(I+)	260	60	62.1651	73.801	1.18718
C(G-)(I+)	260	60	64.6932	77.3052	1.19495
S(G-)(I-)	280	20	81.1937	86.1659	1.06124
S(G+)(I-)	280	20	79.9013	86.7243	1.08539
S(G-)(I+)	280	20	79.0893	86.3951	1.09237
S(G+)(I+)	280	20	79.1365	87.4755	1.10538
C(G+)(I-)	280	20	74.9514	83.2046	1.11011
C(G-)(I-)	280	20	73.7035	85.0067	1.15336
C(G+)(I+)	280	20	71.6942	84.1182	1.17329
C(G-)(I+)	280	20	71.9198	84.2107	1.1709
S(G-)(I-)	280	40	62.5291	69.9603	1.11884
S(G+)(I-)	280	40	61.0405	70.5004	1.15498
S(G-)(I+)	280	40	58.5504	69.0579	1.17946
S(G+)(I+)	280	40	57.9932	67.6268	1.16612
C(G+)(I-)	280	40	72.8253	84.012	1.15361
C(G-)(I-)	280	40	72.3622	84.9256	1.17362
C(G+)(I+)	280	40	68.5447	83.3252	1.21563
C(G-)(I+)	280	40	68.6513	83.127	1.21086
S(G-)(I-)	280	60	57.8785	63.61	1.09903
S(G+)(I-)	280	60	55.9237	63.8901	1.14245
S(G-)(I+)	280	60	55.0296	64.0223	1.16342
S(G+)(I+)	280	60	54.4863	63.7917	1.17078
C(G+)(I-)	280	60	58.8245	71.5604	1.21651
C(G-)(I-)	280	60	60.2925	72.9335	1.20966
C(G+)(I+)	280	60	56.4935	68.9677	1.22081
C(G-)(I+)	280	60	55.9419	69.6171	1.24445
S(G-)(I-)	300	20	65.0329	71.4468	1.09862
S(G+)(I-)	300	20	59.7717	69.6462	1.1652
S(G-)(I+)	300	20	59.2697	69.0863	1.16563
S(G+)(I+)	300	20	59.4976	68.5096	1.15147
C(G+)(I-)	300	20	64.8626	77.5525	1.19564
C(G-)(I-)	300	20	64.992	77.7207	1.19585
C(G+)(I+)	300	20	60.0356	72.007	1.1994
C(G-)(I+)	300	20	60.1341	72.8646	1.2117
S(G-)(I-)	300	40	55.2096	63.7634	1.15493
S(G+)(I-)	300	40	53.1955	63.5948	1.19549
S(G-)(I+)	300	40	53.7057	63.3594	1.17975
S(G+)(I+)	300	40	53.4657	64.2924	1.2025
C(G+)(I-)	300	40	57.2215	69.3787	1.21246
C(G-)(I-)	300	40	55.9017	69.2046	1.23797
C(G+)(I+)	300	40	54.8526	68.0772	1.24109
C(G-)(I+)	300	40	53.9494	65.3815	1.2119
S(G-)(I-)	300	60	54.7005	61.6179	1.12646
S(G+)(I-)	300	60	53.178	62.9155	1.18311
S(G-)(I+)	300	60	53.2371	63.3609	1.19016
S(G+)(I+)	300	60	52.5464	63.1537	1.20187
C(G+)(I-)	300	60	55.6646	68.009	1.22176
C(G-)(I-)	300	60	57.4617	70.0584	1.21922
C(G+)(I+)	300	60	55.5523	67.7556	1.21967
C(G-)(I+)	300	60	54.6519	68.838	1.25957

## Sheet: Oxytree torrefaction TGA
The table represents a TGA analysis of 8 samples types (cultivation types). TGA analysis was performed in the temperature range 200-300 °C with intervals of 20 °C. For each temperature 3 replicates were analyzed. The time of TGA analysis was 1 hour, and the initial mass of each sample was 3 g, weight measurements were taken every 10 seconds.
Cultivation, -	S(G-)(I-)																		S(G+)(I-)																		S(G-)(I+)
Temperatrue, °C	200	200	200	220	220	220	240	240	240	260	260	260	280	280	280	300	300	300	200	200	200	220	220	220	240	240	240	260	260	260	280	280	280	300	300	300	200	200	200	220	220	220	240	240	240	260	260	260	280
Time, s
0	3	3	3	3	3	3	3	3	3	3	3	3	3	3	3	3	3	3	3	3	3	3	3	3	3	3	3	3	3	3	3	3	3	3	3	3	3	3	3	3	3	3	3	3	3	3	3	3	3
10	3	3	3	3	3	3	3	3	3	3	3	3	3	3	3	3	3	3	3	3	3	3	3	3	3	3	3	3	3	3	3	3	3	3	3	3	3	3	3	3	3	3	3	3	3	3	3	3	3
20	3	3	3	3	3	3	3	3	3	3	3	3	3	3	3	3	3	3	3	3	3	3	3	3	3	3	3	3	3	3	3	3	3	3	3	3	3	3	3	3	3	3	3	3	3	3	3	3	3
30	3	3	3	3	3	3	3	3	3	3	3	3	3	3	3	3	3	3	3	3	3	3	3	3	3	3	3	3	3	3	3	3	3	3	3	3	3	3	3	3	3	3	3	3	3	3	3	3	3
41	3	3	3	3	3	3	3	3	3	3	3	3	3	3	3	3	3	3	3	3	3	3	3	3	3	3	3	3	3	3	3	3	3	3	3	3	3	3	3	3	3	3	3	3	3	3	3	3	3
51	3	3	3	3	3	3	3	3	3	3	3	3	3	3	3	3	3	3	3	3	3	3	3	3	3	3	3	3	3	3	3	3	3	3	3	3	3	3	3	3	3	3	3	3	3	3	3	3	3
61	3	3	3	3	3	3	3	3	3	3	3	3	3	3	3	3	3	3	3	3	3	3	3	3	3	3	3	3	3	3	3	3	3	3	3	3	3	3	3	3	3	3	3	3	3	3	3	3	3
71	3	3	3	3	3	3	3	3	3	3	3	3	3	3	3	3	3	3	3	3	3	3	3	3	3	3	3	3	3	3	3	3	3	3	3	3	3	3	3	3	3	3	3	3	3	3	3	3	3
81	3	3	3	3	3	3	3	3	3	3	3	3	3	3	3	3	3	3	3	3	3	3	3	3	3	3	3	3	3	3	3	3	3	3	3	3	3	3	3	3	3	3	3	3	3	3	3	3	3
91	3	3	3	3	3	3	3	3	3	3	3	3	3	3	3	3	3	3	3	3	3	3	3	3	3	3	3	3	3	3	3	3	3	3	3	3	3	3	3	3	3	3	3	3	3	3	3	3	3
102	3	3	3	3	3	3	3	3	3	3	3	3	3	3	3	3	3	3	3	3	3	3	3	3	3	3	3	3	3	3	3	3	3	3	3	3	3	3	3	3	3	3	3	3	3	3	3	3	3
112	3	3	3	3	3	3	3	3	3	3	3	3	3	3	3	3	3	3	3	3	3	3	3	3	3	3	3	3	3	3	3	3	3	3	3	3	3	3	3	3	3	3	3	3	3	3	3	3	3
122	3	3	3	3	3	3	3	3	3	3	3	3	2.99	3	3	3	3	2.99	3	3	3	3	3	3	3	3	3	3	3	3	3	3	3	3	3	3	3	3	3	3	3	3	3	3	3	3	3	3	3
132	3	3	3	3	3	3	3	3	3	3	3	3	2.99	3	3	3	3	2.99	3	3	3	3	3	3	3	3	3	3	3	3	3	3	3	3	3	3	3	3	3	3	3	3	3	3	3	3	3	3	3
142	3	3	3	3	3	3	3	3	3	3	3	3	2.99	3	3	3	3	2.99	3	3	3	3	3	3	3	3	3	2.99	3	3	3	3	3	3	3	3	3	3	3	3	3	3	3	3	3	3	3	2.99	3
152	3	3	3	3	3	3	3	3	3	3	3	3	2.99	3	3	3	3	2.99	3	3	3	3	3	3	3	3	3	2.99	3	2.99	3	3	3	3	3	3	3	3	3	3	3	3	3	3	3	3	3	2.99	3
162	3	3	3	3	3	3	3	3	3	3	3	3	2.99	2.99	3	3	3	2.99	3	3	3	3	3	3	3	3	3	2.99	3	2.99	3	3	3	2.99	3	3	3	3	3	3	3	3	3	3	3	3	3	2.99	3
173	3	3	3	3	3	3	3	3	3	3	3	3	2.99	2.99	3	3	3	2.99	3	3	3	3	3	3	3	3	3	2.99	3	2.99	3	3	3	2.99	3	3	3	3	3	3	3	3	3	3	3	3	3	2.99	3
183	3	3	3	3	3	3	3	3	3	3	3	3	2.99	2.99	3	3	3	2.99	3	3	3	3	3	3	3	3	3	2.99	3	2.99	3	3	3	2.99	3	3	3	3	3	3	3	3	3	3	3	3	3	2.99	3
193	3	3	3	3	3	3	3	3	3	3	3	3	2.99	2.99	3	3	3	2.99	3	3	3	3	3	3	3	3	3	2.99	3	2.99	3	3	3	2.99	3	3	3	3	3	3	3	3	2.99	3	3	3	3	2.99	3
203	3	3	3	3	3	3	3	3	3	3	3	3	2.99	2.99	3	3	3	2.99	3	3	3	3	3	3	3	3	3	2.99	3	2.99	3	3	3	2.99	3	3	3	3	3	3	3	3	2.99	3	3	2.99	3	2.99	3
213	3	3	3	3	3	3	3	3	3	3	3	3	2.99	2.99	3	3	3	2.99	3	3	3	3	3	3	3	3	3	2.99	3	2.99	3	3	3	2.99	3	3	3	3	3	3	3	3	2.99	2.99	3	2.99	3	2.99	3
223	3	3	3	3	3	3	3	3	3	3	3	3	2.99	2.99	3	3	3	2.99	3	3	3	3	3	3	3	2.99	3	2.99	3	2.99	3	3	3	2.99	3	3	3	3	3	3	3	3	2.99	2.99	3	2.99	3	2.99	2.99
233	3	3	3	3	3	3	3	3	3	3	3	3	2.99	2.99	3	2.99	3	2.99	3	3	3	3	3	3	3	2.99	3	2.99	3	2.99	3	2.99	3	2.99	2.99	2.99	3	3	3	3	3	3	2.99	2.99	3	2.99	3	2.99	2.99
244	3	3	3	3	3	3	3	3	3	3	3	3	2.99	2.99	3	2.99	3	2.99	3	3	3	3	3	3	3	2.99	3	2.99	3	2.99	3	2.99	2.99	2.99	2.99	2.99	3	3	3	3	3	3	2.99	2.99	3	2.99	3	2.99	2.99
254	3	3	3	3	3	3	3	3	3	3	3	3	2.99	2.99	3	2.99	3	2.99	3	3	3	3	3	3	3	2.99	3	2.99	3	2.99	3	2.99	2.99	2.99	2.99	2.99	3	3	3	3	3	3	2.99	2.99	3	2.99	2.99	2.99	2.99
264	3	3	3	3	3	3	3	3	3	3	3	3	2.99	2.99	3	2.99	3	2.99	3	3	3	3	3	3	3	2.99	3	2.99	3	2.99	3	2.99	2.99	2.99	2.99	2.99	3	3	3	3	3	3	2.99	2.99	3	2.99	2.99	2.99	2.99
274	3	3	3	3	3	3	3	2.99	3	3	3	3	2.99	2.99	3	2.99	3	2.99	3	3	3	3	3	3	3	2.99	3	2.99	2.99	2.99	3	2.99	2.99	2.99	2.99	2.99	3	3	3	3	3	3	2.99	2.99	3	2.99	2.99	2.99	2.99
284	3	3	3	3	3	3	3	2.99	3	3	3	3	2.99	2.99	3	2.99	3	2.98	3	3	3	3	3	3	3	2.99	3	2.99	2.99	2.99	3	2.99	2.99	2.99	2.99	2.99	3	3	3	3	3	3	2.99	2.99	3	2.99	2.99	2.99	2.99
294	3	3	3	3	3	3	3	2.99	3	3	3	3	2.99	2.99	3	2.99	3	2.98	3	3	3	3	3	2.99	3	2.99	2.99	2.99	2.99	2.99	3	2.99	2.99	2.99	2.99	2.99	3	3	2.99	3	3	3	2.99	2.99	3	2.99	2.99	2.99	2.99
304	3	3	3	3	3	3	3	2.99	3	3	3	3	2.99	2.99	3	2.99	3	2.98	3	3	3	3	3	2.99	3	2.99	2.99	2.99	2.99	2.99	3	2.99	2.99	2.99	2.99	2.99	3	3	2.99	3	3	3	2.99	2.99	3	2.99	2.99	2.98	2.99
315	3	3	3	3	3	3	3	2.99	3	3	3	3	2.99	2.99	3	2.99	3	2.98	3	3	3	3	3	2.99	3	2.99	2.99	2.99	2.99	2.98	3	2.99	2.99	2.98	2.99	2.99	3	3	2.99	3	3	3	2.99	2.99	3	2.99	2.99	2.98	2.99
325	3	3	3	3	3	3	3	2.99	3	3	2.99	3	2.99	2.99	3	2.99	3	2.98	3	3	3	3	3	2.99	3	2.99	2.99	2.98	2.99	2.98	3	2.99	2.99	2.98	2.99	2.98	3	3	2.99	3	3	3	2.99	2.99	3	2.99	2.99	2.98	2.99
335	3	3	3	3	3	3	3	2.99	3	3	2.99	3	2.99	2.99	3	2.99	3	2.98	3	3	3	3	3	2.99	3	2.99	2.99	2.98	2.99	2.98	3	2.99	2.99	2.98	2.98	2.98	3	3	2.99	3	3	3	2.99	2.99	3	2.99	2.99	2.98	2.98
345	3	3	3	3	3	3	3	2.99	3	3	2.99	3	2.99	2.99	3	2.99	3	2.98	3	3	3	3	3	2.99	3	2.99	2.99	2.98	2.99	2.98	3	2.99	2.99	2.98	2.98	2.98	3	3	2.99	3	3	3	2.99	2.99	3	2.99	2.99	2.98	2.98
355	3	3	3	3	3	3	3	2.99	3	3	2.99	3	2.99	2.99	3	2.99	3	2.98	3	3	3	3	3	2.99	3	2.99	2.99	2.98	2.99	2.98	3	2.99	2.99	2.98	2.98	2.98	3	3	2.99	3	3	3	2.99	2.99	3	2.98	2.99	2.98	2.98
365	3	3	3	3	3	3	3	2.99	3	3	2.99	3	2.99	2.99	3	2.99	3	2.98	3	3	3	3	3	2.99	3	2.99	2.99	2.98	2.99	2.98	3	2.98	2.98	2.98	2.98	2.98	3	3	2.99	3	3	3	2.99	2.99	3	2.98	2.99	2.98	2.98
375	3	3	3	3	3	3	3	2.99	3	3	2.99	3	2.99	2.99	3	2.99	3	2.98	3	3	3	3	3	2.99	3	2.99	2.99	2.98	2.99	2.98	2.99	2.98	2.98	2.98	2.98	2.98	3	3	2.99	3	3	3	2.99	2.99	3	2.98	2.99	2.98	2.98
385	3	3	3	3	3	3	3	2.99	3	3	2.99	3	2.99	2.99	3	2.99	3	2.97	3	3	3	3	3	2.99	3	2.99	2.99	2.98	2.99	2.98	2.99	2.98	2.98	2.98	2.98	2.97	2.99	3	2.99	3	3	3	2.99	2.99	3	2.98	2.99	2.98	2.98
396	3	3	3	3	3	3	3	2.99	3	3	2.99	3	2.99	2.99	3	2.99	3	2.97	3	3	3	3	3	2.99	2.99	2.99	2.99	2.98	2.99	2.98	2.99	2.98	2.98	2.97	2.98	2.97	2.99	3	2.99	3	3	3	2.99	2.99	3	2.98	2.99	2.98	2.98
406	3	3	3	3	3	3	3	2.99	3	3	2.99	3	2.99	2.99	3	2.99	3	2.97	3	3	3	3	3	2.99	2.99	2.99	2.99	2.98	2.99	2.98	2.99	2.98	2.98	2.97	2.97	2.97	2.99	3	2.99	3	3	3	2.99	2.99	3	2.98	2.98	2.98	2.98
416	3	3	3	3	3	3	3	2.99	3	3	2.99	3	2.99	2.99	3	2.99	3	2.97	3	3	3	3	3	2.99	2.99	2.99	2.99	2.98	2.99	2.98	2.99	2.98	2.98	2.97	2.97	2.97	2.99	3	2.99	3	3	2.99	2.99	2.99	3	2.98	2.98	2.98	2.98
426	3	3	3	3	3	3	3	2.99	3	3	2.99	3	2.98	2.99	3	2.98	3	2.97	3	3	3	3	3	2.99	2.99	2.99	2.99	2.98	2.98	2.98	2.99	2.98	2.98	2.97	2.97	2.97	2.99	3	2.99	3	3	2.99	2.98	2.99	3	2.98	2.98	2.97	2.97
436	3	3	3	3	3	3	2.99	2.99	3	2.99	2.99	3	2.98	2.99	2.99	2.98	3	2.97	3	3	3	3	3	2.99	2.99	2.98	2.99	2.98	2.98	2.97	2.99	2.98	2.98	2.97	2.97	2.96	2.99	3	2.99	3	3	2.99	2.98	2.98	3	2.98	2.98	2.97	2.97
446	3	3	3	3	3	3	2.99	2.99	3	2.99	2.99	3	2.98	2.99	2.99	2.98	3	2.97	3	3	3	3	3	2.99	2.99	2.98	2.99	2.98	2.98	2.97	2.99	2.98	2.97	2.96	2.97	2.96	2.99	3	2.99	3	3	2.99	2.98	2.98	3	2.98	2.98	2.97	2.97
456	3	3	3	3	3	3	2.99	2.99	3	2.99	2.99	3	2.98	2.99	2.99	2.98	3	2.97	3	3	3	3	3	2.99	2.99	2.98	2.99	2.98	2.98	2.97	2.99	2.98	2.97	2.96	2.96	2.96	2.99	3	2.99	3	3	2.99	2.98	2.98	3	2.98	2.98	2.97	2.97
467	3	3	3	3	3	3	2.99	2.99	3	2.99	2.99	3	2.98	2.99	2.99	2.98	3	2.97	3	3	3	3	3	2.99	2.99	2.98	2.99	2.98	2.98	2.97	2.99	2.97	2.97	2.96	2.96	2.96	2.99	3	2.99	3	3	2.99	2.98	2.98	3	2.98	2.98	2.97	2.97
477	3	3	3	3	3	3	2.99	2.99	3	2.99	2.99	3	2.98	2.99	2.99	2.98	3	2.96	3	3	3	2.99	3	2.99	2.99	2.98	2.99	2.97	2.98	2.97	2.99	2.97	2.97	2.96	2.96	2.95	2.99	3	2.99	3	3	2.99	2.98	2.98	3	2.97	2.98	2.97	2.97
487	3	3	3	3	3	3	2.99	2.99	3	2.99	2.99	3	2.98	2.99	2.99	2.98	3	2.96	3	3	3	2.99	3	2.99	2.99	2.98	2.99	2.97	2.98	2.97	2.99	2.97	2.97	2.96	2.96	2.95	2.99	3	2.99	3	3	2.99	2.98	2.98	3	2.97	2.98	2.97	2.97
497	3	3	3	3	3	3	2.99	2.99	2.99	2.99	2.99	3	2.98	2.98	2.99	2.98	3	2.96	3	3	3	2.99	3	2.99	2.99	2.98	2.98	2.97	2.98	2.97	2.99	2.97	2.97	2.95	2.95	2.95	2.99	3	2.99	3	3	2.99	2.98	2.98	3	2.97	2.98	2.97	2.96
507	3	3	3	3	3	3	2.99	2.99	2.99	2.99	2.99	3	2.98	2.98	2.99	2.97	3	2.96	2.99	3	3	2.99	3	2.99	2.99	2.98	2.98	2.97	2.98	2.97	2.99	2.97	2.96	2.95	2.95	2.94	2.99	3	2.99	3	3	2.99	2.98	2.98	3	2.97	2.98	2.97	2.96
517	3	3	3	3	3	3	2.99	2.99	2.99	2.99	2.99	3	2.98	2.98	2.99	2.97	3	2.96	2.99	3	3	2.99	3	2.99	2.99	2.98	2.98	2.97	2.98	2.97	2.99	2.97	2.96	2.95	2.95	2.94	2.99	3	2.99	3	3	2.99	2.98	2.98	3	2.97	2.97	2.97	2.96
527	3	3	3	3	3	3	2.99	2.99	2.99	2.99	2.99	3	2.98	2.98	2.99	2.97	3	2.96	2.99	3	3	2.99	3	2.99	2.99	2.98	2.98	2.97	2.98	2.97	2.99	2.97	2.96	2.94	2.94	2.94	2.99	3	2.99	3	3	2.99	2.98	2.98	3	2.97	2.97	2.97	2.96
538	3	3	3	3	3	3	2.99	2.99	2.99	2.99	2.99	3	2.98	2.98	2.99	2.97	3	2.96	2.99	3	3	2.99	3	2.99	2.99	2.98	2.98	2.97	2.98	2.97	2.99	2.96	2.96	2.94	2.94	2.93	2.99	3	2.99	3	3	2.99	2.98	2.98	3	2.97	2.97	2.96	2.96
548	3	3	3	3	3	3	2.99	2.99	2.99	2.99	2.98	3	2.98	2.98	2.99	2.97	3	2.95	2.99	3	3	2.99	3	2.98	2.99	2.98	2.98	2.97	2.97	2.96	2.99	2.96	2.96	2.94	2.94	2.93	2.99	3	2.99	3	3	2.99	2.98	2.98	3	2.97	2.97	2.96	2.96
558	3	3	3	3	3	3	2.99	2.99	2.99	2.99	2.98	3	2.98	2.98	2.99	2.96	3	2.95	2.99	3	3	2.99	3	2.98	2.99	2.98	2.98	2.97	2.97	2.96	2.99	2.96	2.95	2.94	2.93	2.93	2.99	3	2.99	3	2.99	2.99	2.98	2.98	3	2.97	2.97	2.96	2.95
568	3	3	2.99	3	3	3	2.99	2.99	2.99	2.99	2.98	3	2.98	2.98	2.99	2.96	3	2.95	2.99	3	3	2.99	3	2.98	2.99	2.98	2.98	2.97	2.97	2.96	2.99	2.96	2.95	2.93	2.93	2.92	2.99	3	2.99	3	2.99	2.99	2.98	2.98	3	2.97	2.97	2.96	2.95
578	3	3	2.99	3	3	3	2.99	2.99	2.99	2.99	2.98	3	2.98	2.98	2.99	2.96	2.99	2.95	2.99	3	3	2.99	3	2.98	2.99	2.98	2.98	2.97	2.97	2.96	2.99	2.96	2.95	2.93	2.93	2.92	2.99	3	2.99	3	2.99	2.99	2.98	2.98	3	2.96	2.97	2.96	2.95
588	3	3	2.99	3	3	3	2.99	2.99	2.99	2.99	2.98	3	2.98	2.98	2.99	2.96	2.99	2.95	2.99	3	3	2.99	3	2.98	2.99	2.98	2.98	2.96	2.97	2.96	2.99	2.95	2.95	2.92	2.92	2.92	2.99	3	2.99	3	2.99	2.99	2.98	2.98	3	2.96	2.97	2.96	2.95
598	3	3	2.99	3	3	3	2.99	2.99	2.99	2.99	2.98	3	2.98	2.98	2.98	2.95	2.99	2.94	2.99	2.99	3	2.99	3	2.98	2.99	2.97	2.98	2.96	2.97	2.96	2.99	2.95	2.95	2.92	2.92	2.91	2.99	3	2.99	3	2.99	2.99	2.98	2.98	3	2.96	2.97	2.96	2.95
609	3	3	2.99	3	3	3	2.99	2.99	2.99	2.99	2.98	3	2.97	2.98	2.98	2.95	2.99	2.94	2.99	2.99	3	2.99	3	2.98	2.98	2.97	2.98	2.96	2.97	2.96	2.99	2.95	2.94	2.92	2.91	2.91	2.99	3	2.99	3	2.99	2.99	2.98	2.98	3	2.96	2.97	2.96	2.95
619	3	3	2.99	3	3	3	2.99	2.99	2.99	2.99	2.98	3	2.97	2.98	2.98	2.95	2.99	2.94	2.99	2.99	3	2.99	3	2.98	2.98	2.97	2.98	2.96	2.97	2.96	2.99	2.95	2.94	2.91	2.91	2.9	2.99	3	2.99	3	2.99	2.99	2.97	2.98	3	2.96	2.97	2.96	2.94
629	3	3	2.99	3	3	3	2.99	2.99	2.99	2.99	2.98	3	2.97	2.98	2.98	2.95	2.99	2.94	2.99	2.99	3	2.99	3	2.98	2.98	2.97	2.98	2.96	2.97	2.96	2.98	2.95	2.94	2.91	2.91	2.9	2.99	3	2.99	3	2.99	2.99	2.97	2.97	3	2.96	2.96	2.95	2.94
639	3	3	2.99	3	3	3	2.99	2.99	2.99	2.99	2.98	3	2.97	2.97	2.98	2.94	2.99	2.94	2.99	2.99	3	2.99	3	2.98	2.98	2.97	2.98	2.96	2.97	2.96	2.98	2.94	2.94	2.91	2.9	2.89	2.99	3	2.99	2.99	2.99	2.99	2.97	2.97	3	2.96	2.96	2.95	2.94
649	3	3	2.99	3	3	3	2.99	2.99	2.99	2.99	2.98	3	2.97	2.97	2.98	2.94	2.99	2.93	2.99	2.99	2.99	2.99	3	2.98	2.98	2.97	2.98	2.96	2.97	2.96	2.98	2.94	2.93	2.9	2.9	2.89	2.99	3	2.99	2.99	2.99	2.99	2.97	2.97	3	2.96	2.96	2.95	2.94
659	3	3	2.99	3	3	3	2.99	2.99	2.99	2.99	2.98	3	2.97	2.97	2.98	2.94	2.99	2.93	2.99	2.99	2.99	2.99	3	2.98	2.98	2.97	2.97	2.96	2.96	2.95	2.98	2.94	2.93	2.9	2.89	2.88	2.99	3	2.99	2.99	2.99	2.99	2.97	2.97	3	2.96	2.96	2.95	2.93
670	3	3	2.99	3	3	3	2.99	2.99	2.99	2.99	2.98	3	2.97	2.97	2.98	2.93	2.98	2.93	2.99	2.99	2.99	2.99	3	2.98	2.98	2.97	2.97	2.96	2.96	2.95	2.98	2.94	2.93	2.89	2.89	2.88	2.99	3	2.99	2.99	2.99	2.99	2.97	2.97	3	2.95	2.96	2.95	2.93
680	3	3	2.99	3	3	3	2.99	2.99	2.99	2.99	2.98	3	2.97	2.97	2.98	2.93	2.98	2.93	2.99	2.99	2.99	2.99	3	2.98	2.98	2.97	2.97	2.96	2.96	2.95	2.98	2.94	2.93	2.89	2.88	2.87	2.99	3	2.99	2.99	2.99	2.99	2.97	2.97	3	2.95	2.96	2.95	2.93
690	3	3	2.99	3	3	3	2.99	2.98	2.99	2.99	2.98	3	2.97	2.97	2.97	2.93	2.98	2.92	2.99	2.99	2.99	2.99	3	2.98	2.98	2.97	2.97	2.95	2.96	2.95	2.98	2.93	2.92	2.88	2.88	2.87	2.99	3	2.99	2.99	2.99	2.99	2.97	2.97	3	2.95	2.96	2.95	2.93
700	3	3	2.99	3	3	3	2.99	2.98	2.99	2.99	2.97	3	2.97	2.97	2.97	2.92	2.98	2.92	2.99	2.99	2.99	2.99	3	2.98	2.98	2.97	2.97	2.95	2.96	2.95	2.98	2.93	2.92	2.88	2.87	2.86	2.99	2.99	2.99	2.99	2.99	2.99	2.97	2.97	3	2.95	2.96	2.95	2.93
710	3	3	2.99	3	3	3	2.99	2.98	2.99	2.99	2.97	3	2.97	2.97	2.97	2.92	2.98	2.92	2.99	2.99	2.99	2.99	3	2.98	2.98	2.97	2.97	2.95	2.96	2.95	2.98	2.93	2.92	2.87	2.87	2.86	2.99	2.99	2.99	2.99	2.99	2.99	2.97	2.97	3	2.95	2.96	2.94	2.92
720	3	3	2.99	3	3	3	2.99	2.98	2.99	2.99	2.97	3	2.96	2.97	2.97	2.92	2.97	2.92	2.99	2.99	2.99	2.99	3	2.98	2.98	2.97	2.97	2.95	2.96	2.95	2.98	2.92	2.91	2.87	2.86	2.85	2.99	2.99	2.99	2.99	2.99	2.99	2.97	2.97	3	2.95	2.96	2.94	2.92
730	3	3	2.99	3	3	3	2.99	2.98	2.99	2.99	2.97	3	2.96	2.96	2.97	2.91	2.97	2.91	2.99	2.99	2.99	2.99	3	2.98	2.98	2.97	2.97	2.95	2.96	2.95	2.97	2.92	2.91	2.86	2.85	2.85	2.99	2.99	2.99	2.99	2.99	2.99	2.97	2.97	3	2.95	2.95	2.94	2.92
741	3	3	2.99	3	3	3	2.99	2.98	2.99	2.99	2.97	3	2.96	2.96	2.97	2.91	2.97	2.91	2.99	2.99	2.99	2.99	3	2.98	2.98	2.97	2.97	2.95	2.96	2.94	2.97	2.92	2.91	2.86	2.85	2.84	2.99	2.99	2.99	2.99	2.99	2.99	2.97	2.97	3	2.95	2.95	2.94	2.91
751	3	3	2.99	3	3	3	2.99	2.98	2.98	2.99	2.97	3	2.96	2.96	2.96	2.9	2.97	2.91	2.99	2.99	2.99	2.99	3	2.98	2.98	2.96	2.97	2.95	2.95	2.94	2.97	2.92	2.9	2.85	2.84	2.83	2.99	2.99	2.99	2.99	2.99	2.99	2.97	2.97	3	2.94	2.95	2.94	2.91
761	3	3	2.99	3	3	3	2.99	2.98	2.98	2.99	2.97	3	2.96	2.96	2.96	2.9	2.96	2.91	2.99	2.99	2.99	2.99	3	2.98	2.98	2.96	2.97	2.95	2.95	2.94	2.97	2.91	2.9	2.85	2.84	2.83	2.99	2.99	2.99	2.99	2.99	2.99	2.97	2.97	3	2.94	2.95	2.94	2.91
771	3	3	2.99	3	3	3	2.99	2.98	2.98	2.99	2.97	3	2.96	2.96	2.96	2.89	2.96	2.9	2.99	2.99	2.99	2.99	3	2.97	2.98	2.96	2.97	2.94	2.95	2.94	2.97	2.91	2.9	2.84	2.83	2.82	2.99	2.99	2.99	2.99	2.99	2.99	2.97	2.97	3	2.94	2.95	2.94	2.91
781	3	3	2.99	3	3	3	2.99	2.98	2.98	2.98	2.97	3	2.96	2.96	2.96	2.89	2.96	2.9	2.99	2.99	2.99	2.99	3	2.98	2.97	2.96	2.97	2.94	2.95	2.94	2.97	2.91	2.89	2.84	2.83	2.82	2.99	2.99	2.99	2.99	2.99	2.99	2.97	2.97	3	2.94	2.95	2.94	2.9
791	3	3	2.99	3	3	3	2.99	2.98	2.98	2.99	2.97	3	2.95	2.96	2.96	2.89	2.95	2.9	2.99	2.99	2.99	2.99	3	2.97	2.97	2.96	2.97	2.94	2.95	2.94	2.97	2.9	2.89	2.83	2.82	2.81	2.99	2.99	2.99	2.99	2.99	2.99	2.96	2.96	3	2.94	2.95	2.93	2.9
801	3	3	2.99	3	3	3	2.98	2.98	2.98	2.98	2.97	3	2.95	2.95	2.96	2.88	2.95	2.89	2.99	2.99	2.99	2.99	3	2.97	2.97	2.96	2.96	2.94	2.95	2.94	2.97	2.9	2.89	2.83	2.82	2.81	2.99	2.99	2.99	2.99	2.99	2.98	2.96	2.96	3	2.94	2.95	2.93	2.9
812	3	3	2.99	3	3	3	2.98	2.98	2.98	2.98	2.97	3	2.95	2.95	2.95	2.88	2.95	2.89	2.99	2.99	2.99	2.99	3	2.97	2.97	2.96	2.96	2.94	2.95	2.94	2.96	2.9	2.88	2.82	2.81	2.8	2.99	2.99	2.99	2.99	2.99	2.98	2.96	2.96	3	2.94	2.94	2.93	2.9
822	3	3	2.99	3	3	3	2.98	2.98	2.98	2.98	2.96	3	2.95	2.95	2.95	2.87	2.94	2.89	2.99	2.99	2.99	2.99	3	2.97	2.97	2.96	2.96	2.94	2.95	2.94	2.96	2.9	2.88	2.82	2.8	2.8	2.99	2.99	2.99	2.99	2.99	2.98	2.96	2.96	3	2.94	2.94	2.93	2.89
832	3	3	2.99	3	3	3	2.98	2.98	2.98	2.98	2.96	3	2.95	2.95	2.95	2.87	2.94	2.88	2.99	2.99	2.99	2.99	3	2.97	2.97	2.96	2.96	2.94	2.94	2.93	2.96	2.89	2.88	2.81	2.8	2.79	2.99	2.99	2.99	2.99	2.99	2.98	2.96	2.96	3	2.93	2.94	2.93	2.89
842	3	3	2.99	3	3	3	2.98	2.98	2.98	2.98	2.96	3	2.95	2.95	2.95	2.86	2.94	2.88	2.99	2.99	2.99	2.99	3	2.97	2.97	2.96	2.96	2.93	2.94	2.93	2.96	2.89	2.87	2.81	2.79	2.79	2.99	2.99	2.99	2.99	2.99	2.98	2.96	2.96	3	2.93	2.94	2.93	2.89
852	3	3	2.99	3	3	3	2.98	2.98	2.98	2.98	2.96	3	2.94	2.95	2.95	2.86	2.93	2.88	2.99	2.99	2.99	2.99	3	2.97	2.97	2.96	2.96	2.93	2.94	2.93	2.96	2.89	2.87	2.8	2.79	2.78	2.99	2.99	2.99	2.99	2.99	2.98	2.96	2.96	3	2.93	2.94	2.92	2.88
862	3	3	2.99	3	3	3	2.98	2.98	2.98	2.98	2.96	3	2.94	2.94	2.94	2.85	2.93	2.87	2.99	2.99	2.99	2.99	3	2.97	2.97	2.96	2.96	2.93	2.94	2.93	2.96	2.88	2.87	2.8	2.78	2.78	2.99	2.99	2.99	2.99	2.99	2.98	2.96	2.96	3	2.93	2.94	2.92	2.88
872	3	3	2.99	3	3	3	2.98	2.98	2.98	2.98	2.96	3	2.94	2.94	2.94	2.85	2.93	2.87	2.99	2.99	2.99	2.99	3	2.97	2.97	2.96	2.96	2.93	2.94	2.93	2.95	2.88	2.86	2.79	2.78	2.77	2.99	2.99	2.99	2.99	2.99	2.98	2.96	2.96	3	2.93	2.94	2.92	2.88
883	3	3	2.99	3	3	3	2.98	2.98	2.98	2.98	2.96	3	2.94	2.94	2.94	2.84	2.92	2.87	2.99	2.99	2.99	2.99	3	2.97	2.97	2.96	2.96	2.93	2.94	2.93	2.95	2.88	2.86	2.79	2.77	2.77	2.99	2.99	2.99	2.99	2.99	2.98	2.96	2.96	3	2.93	2.93	2.92	2.87
893	3	3	2.99	3	3	3	2.98	2.98	2.98	2.98	2.96	3	2.94	2.94	2.94	2.84	2.92	2.86	2.99	2.99	2.99	2.98	3	2.97	2.97	2.95	2.96	2.93	2.94	2.93	2.95	2.87	2.86	2.78	2.77	2.76	2.99	2.99	2.99	2.99	2.99	2.98	2.96	2.96	3	2.92	2.93	2.92	2.87
903	3	3	2.99	3	3	3	2.98	2.98	2.98	2.98	2.96	3	2.93	2.93	2.94	2.84	2.91	2.86	2.99	2.99	2.99	2.98	3	2.97	2.97	2.95	2.96	2.93	2.93	2.92	2.95	2.87	2.85	2.78	2.76	2.76	2.99	2.99	2.99	2.99	2.99	2.98	2.96	2.96	3	2.92	2.93	2.92	2.87
913	3	3	2.99	3	3	3	2.98	2.98	2.98	2.98	2.96	2.99	2.93	2.93	2.93	2.83	2.91	2.86	2.99	2.99	2.99	2.98	3	2.97	2.97	2.95	2.96	2.92	2.93	2.92	2.95	2.86	2.85	2.77	2.76	2.75	2.99	2.99	2.98	2.99	2.99	2.98	2.96	2.96	3	2.92	2.93	2.91	2.86
923	3	3	2.99	3	3	3	2.98	2.98	2.98	2.98	2.95	2.99	2.93	2.93	2.93	2.83	2.91	2.85	2.99	2.99	2.99	2.98	3	2.97	2.97	2.95	2.96	2.92	2.93	2.92	2.94	2.86	2.85	2.77	2.76	2.75	2.99	2.99	2.98	2.99	2.99	2.98	2.95	2.96	3	2.92	2.93	2.91	2.86
933	3	3	2.99	3	3	3	2.98	2.98	2.97	2.98	2.95	2.99	2.93	2.93	2.93	2.82	2.9	2.85	2.99	2.99	2.99	2.98	3	2.97	2.96	2.95	2.95	2.92	2.93	2.92	2.94	2.86	2.84	2.77	2.75	2.74	2.99	2.99	2.98	2.99	2.99	2.98	2.95	2.95	3	2.92	2.93	2.91	2.86
943	3	3	2.99	3	3	2.99	2.98	2.98	2.97	2.98	2.95	2.99	2.93	2.93	2.93	2.82	2.9	2.84	2.99	2.99	2.99	2.98	3	2.97	2.96	2.95	2.95	2.92	2.93	2.92	2.94	2.85	2.84	2.76	2.75	2.74	2.99	2.99	2.98	2.99	2.99	2.98	2.95	2.95	3	2.92	2.92	2.91	2.85
954	3	3	2.99	3	3	2.99	2.98	2.97	2.97	2.98	2.95	2.99	2.92	2.92	2.92	2.81	2.89	2.84	2.99	2.99	2.99	2.98	3	2.97	2.96	2.95	2.95	2.92	2.93	2.92	2.94	2.85	2.84	2.76	2.74	2.73	2.99	2.99	2.98	2.99	2.99	2.98	2.95	2.95	2.99	2.91	2.92	2.91	2.85
964	3	3	2.99	3	3	2.99	2.98	2.97	2.97	2.98	2.95	2.99	2.92	2.92	2.92	2.81	2.89	2.84	2.99	2.99	2.99	2.98	3	2.97	2.96	2.95	2.95	2.92	2.92	2.91	2.93	2.85	2.83	2.75	2.74	2.73	2.99	2.99	2.98	2.99	2.99	2.98	2.95	2.95	2.99	2.91	2.92	2.91	2.85
974	3	3	2.99	3	3	2.99	2.98	2.97	2.97	2.98	2.95	2.99	2.92	2.92	2.92	2.8	2.88	2.83	2.99	2.99	2.99	2.98	3	2.97	2.96	2.95	2.95	2.91	2.92	2.91	2.93	2.84	2.83	2.75	2.73	2.73	2.99	2.99	2.98	2.99	2.99	2.98	2.95	2.95	2.99	2.91	2.92	2.9	2.84
984	3	3	2.98	3	3	2.99	2.98	2.97	2.97	2.98	2.95	2.99	2.92	2.92	2.92	2.8	2.88	2.83	2.99	2.99	2.99	2.98	3	2.97	2.96	2.95	2.95	2.91	2.92	2.91	2.93	2.84	2.83	2.74	2.73	2.72	2.99	2.99	2.98	2.99	2.99	2.98	2.95	2.95	2.99	2.91	2.92	2.9	2.84
994	3	3	2.98	3	3	2.99	2.98	2.97	2.97	2.98	2.95	2.99	2.91	2.91	2.91	2.8	2.88	2.82	2.99	2.99	2.99	2.98	3	2.97	2.96	2.95	2.95	2.91	2.92	2.91	2.93	2.84	2.82	2.74	2.73	2.72	2.99	2.99	2.98	2.99	2.99	2.98	2.95	2.95	2.99	2.91	2.92	2.9	2.84
1004	3	3	2.98	3	3	2.99	2.98	2.97	2.97	2.98	2.94	2.99	2.91	2.91	2.91	2.79	2.87	2.82	2.99	2.99	2.99	2.98	3	2.97	2.96	2.95	2.95	2.91	2.92	2.91	2.93	2.83	2.82	2.74	2.72	2.72	2.99	2.99	2.98	2.99	2.99	2.98	2.95	2.95	2.99	2.91	2.92	2.9	2.83
1015	3	3	2.98	3	3	2.99	2.97	2.97	2.97	2.97	2.94	2.99	2.91	2.91	2.91	2.79	2.87	2.82	2.99	2.99	2.99	2.98	3	2.97	2.96	2.95	2.95	2.91	2.92	2.91	2.92	2.83	2.82	2.73	2.72	2.71	2.99	2.99	2.98	2.99	2.99	2.98	2.95	2.95	2.99	2.9	2.91	2.9	2.83
1025	3	3	2.98	3	3	2.99	2.97	2.97	2.97	2.97	2.94	2.99	2.91	2.91	2.91	2.78	2.86	2.81	2.99	2.99	2.99	2.98	3	2.96	2.96	2.95	2.95	2.91	2.91	2.9	2.92	2.83	2.81	2.73	2.72	2.71	2.99	2.99	2.98	2.99	2.99	2.98	2.95	2.95	2.99	2.9	2.91	2.89	2.83
1035	3	3	2.98	3	3	2.99	2.97	2.97	2.97	2.97	2.94	2.99	2.9	2.9	2.9	2.78	2.86	2.81	2.99	2.99	2.99	2.98	3	2.96	2.96	2.94	2.95	2.9	2.91	2.9	2.92	2.82	2.81	2.73	2.71	2.71	2.99	2.99	2.98	2.99	2.98	2.98	2.95	2.95	2.99	2.9	2.91	2.89	2.82
1045	3	3	2.98	3	3	2.99	2.97	2.97	2.97	2.97	2.94	2.98	2.9	2.9	2.9	2.77	2.85	2.8	2.99	2.99	2.99	2.98	3	2.96	2.96	2.94	2.95	2.9	2.91	2.9	2.92	2.82	2.81	2.72	2.71	2.7	2.99	2.99	2.98	2.99	2.98	2.98	2.95	2.95	2.99	2.9	2.91	2.89	2.82
1055	3	3	2.98	3	3	2.99	2.97	2.97	2.97	2.97	2.94	2.98	2.9	2.9	2.9	2.77	2.85	2.8	2.99	2.99	2.99	2.98	3	2.96	2.96	2.94	2.95	2.9	2.91	2.9	2.91	2.82	2.8	2.72	2.71	2.7	2.99	2.99	2.98	2.99	2.98	2.98	2.95	2.95	2.99	2.9	2.91	2.89	2.82
1065	3	3	2.98	3	3	2.99	2.97	2.97	2.97	2.97	2.94	2.98	2.9	2.9	2.9	2.77	2.85	2.79	2.99	2.99	2.99	2.98	3	2.96	2.96	2.94	2.94	2.9	2.91	2.9	2.91	2.81	2.8	2.72	2.7	2.7	2.99	2.99	2.98	2.99	2.98	2.98	2.94	2.95	2.99	2.89	2.9	2.89	2.81
1075	3	3	2.98	3	3	2.99	2.97	2.97	2.97	2.97	2.94	2.98	2.9	2.89	2.89	2.76	2.84	2.79	2.99	2.99	2.99	2.98	3	2.96	2.95	2.94	2.94	2.9	2.91	2.9	2.91	2.81	2.8	2.71	2.7	2.69	2.99	2.99	2.98	2.99	2.98	2.98	2.94	2.94	2.99	2.89	2.9	2.89	2.81
1085	3	3	2.98	3	3	2.99	2.97	2.97	2.96	2.97	2.93	2.98	2.89	2.89	2.89	2.76	2.84	2.79	2.99	2.99	2.99	2.98	3	2.96	2.95	2.94	2.94	2.9	2.9	2.89	2.9	2.81	2.79	2.71	2.7	2.69	2.99	2.99	2.98	2.99	2.98	2.98	2.94	2.94	2.99	2.89	2.9	2.88	2.81
1096	3	3	2.98	3	3	2.99	2.97	2.97	2.96	2.97	2.93	2.98	2.89	2.89	2.89	2.76	2.83	2.78	2.99	2.99	2.99	2.98	3	2.96	2.95	2.94	2.94	2.89	2.9	2.89	2.9	2.8	2.79	2.71	2.69	2.69	2.99	2.99	2.98	2.99	2.98	2.98	2.94	2.94	2.99	2.89	2.9	2.88	2.8
1106	3	3	2.98	3	3	2.99	2.97	2.97	2.96	2.97	2.93	2.98	2.89	2.89	2.88	2.75	2.83	2.78	2.99	2.99	2.99	2.98	3	2.96	2.95	2.94	2.94	2.89	2.9	2.89	2.9	2.8	2.79	2.7	2.69	2.68	2.99	2.99	2.98	2.99	2.98	2.98	2.94	2.94	2.99	2.89	2.9	2.88	2.8
1116	3	3	2.98	3	3	2.99	2.97	2.97	2.96	2.97	2.93	2.98	2.89	2.88	2.88	2.75	2.82	2.77	2.99	2.99	2.99	2.98	3	2.96	2.95	2.94	2.94	2.89	2.9	2.89	2.9	2.8	2.79	2.7	2.69	2.68	2.99	2.99	2.98	2.99	2.98	2.98	2.94	2.94	2.99	2.88	2.9	2.88	2.8
1126	3	3	2.98	3	3	2.99	2.97	2.96	2.96	2.97	2.93	2.98	2.88	2.88	2.88	2.74	2.82	2.77	2.99	2.99	2.99	2.98	3	2.96	2.95	2.94	2.94	2.89	2.9	2.89	2.89	2.79	2.78	2.7	2.68	2.68	2.99	2.99	2.98	2.99	2.98	2.98	2.94	2.94	2.99	2.88	2.89	2.88	2.8
1136	3	3	2.98	3	3	2.99	2.97	2.96	2.96	2.97	2.93	2.98	2.88	2.88	2.88	2.74	2.82	2.77	2.99	2.99	2.99	2.98	3	2.96	2.95	2.94	2.94	2.89	2.89	2.89	2.89	2.79	2.78	2.69	2.68	2.67	2.99	2.99	2.98	2.99	2.98	2.98	2.94	2.94	2.99	2.88	2.89	2.87	2.79
1146	3	3	2.98	3	3	2.99	2.97	2.96	2.96	2.97	2.93	2.97	2.88	2.87	2.87	2.74	2.81	2.76	2.99	2.99	2.99	2.98	3	2.96	2.95	2.93	2.94	2.88	2.89	2.88	2.89	2.79	2.78	2.69	2.68	2.67	2.99	2.99	2.98	2.99	2.98	2.98	2.94	2.94	2.99	2.88	2.89	2.87	2.79
1156	3	3	2.98	3	3	2.99	2.97	2.96	2.96	2.97	2.92	2.97	2.87	2.87	2.87	2.74	2.81	2.76	2.99	2.99	2.99	2.98	3	2.96	2.95	2.93	2.94	2.88	2.89	2.88	2.88	2.79	2.78	2.69	2.68	2.67	2.99	2.99	2.98	2.99	2.98	2.97	2.94	2.94	2.99	2.88	2.89	2.87	2.79
1167	3	3	2.98	3	3	2.99	2.97	2.96	2.96	2.97	2.92	2.97	2.87	2.87	2.87	2.73	2.81	2.76	2.99	2.99	2.99	2.98	3	2.96	2.95	2.93	2.94	2.88	2.89	2.88	2.88	2.78	2.77	2.69	2.67	2.67	2.99	2.99	2.98	2.99	2.98	2.97	2.94	2.94	2.99	2.88	2.89	2.87	2.78
1177	3	3	2.98	3	3	2.99	2.97	2.96	2.96	2.97	2.92	2.97	2.87	2.87	2.87	2.73	2.8	2.75	2.99	2.99	2.99	2.98	3	2.96	2.95	2.93	2.94	2.88	2.89	2.88	2.88	2.78	2.77	2.68	2.67	2.66	2.99	2.99	2.98	2.99	2.98	2.97	2.93	2.94	2.99	2.87	2.88	2.87	2.78
1187	3	3	2.98	3	3	2.99	2.96	2.96	2.96	2.96	2.92	2.97	2.87	2.86	2.86	2.73	2.8	2.75	2.99	2.99	2.99	2.97	3	2.96	2.95	2.93	2.93	2.88	2.89	2.88	2.88	2.78	2.77	2.68	2.67	2.66	2.99	2.99	2.98	2.99	2.98	2.97	2.93	2.93	2.99	2.87	2.88	2.86	2.78
1197	3	3	2.98	3	3	2.99	2.96	2.96	2.96	2.96	2.92	2.97	2.86	2.86	2.86	2.72	2.8	2.75	2.99	2.99	2.99	2.97	3	2.96	2.95	2.93	2.93	2.88	2.88	2.87	2.87	2.77	2.77	2.68	2.67	2.66	2.99	2.99	2.98	2.99	2.98	2.97	2.93	2.93	2.99	2.87	2.88	2.86	2.78
1207	3	3	2.98	3	3	2.99	2.96	2.96	2.96	2.96	2.92	2.97	2.86	2.86	2.86	2.72	2.79	2.74	2.99	2.99	2.99	2.97	3	2.96	2.94	2.93	2.93	2.87	2.88	2.87	2.87	2.77	2.76	2.68	2.66	2.66	2.99	2.99	2.98	2.99	2.98	2.97	2.93	2.93	2.99	2.87	2.88	2.86	2.77
1217	3	3	2.98	3	3	2.99	2.96	2.96	2.95	2.96	2.92	2.97	2.86	2.86	2.86	2.72	2.79	2.74	2.99	2.99	2.99	2.97	3	2.96	2.94	2.93	2.93	2.87	2.88	2.87	2.87	2.77	2.76	2.67	2.66	2.65	2.99	2.99	2.98	2.99	2.98	2.97	2.93	2.93	2.98	2.87	2.88	2.86	2.77
1227	3	3	2.98	3	3	2.99	2.96	2.96	2.95	2.96	2.91	2.96	2.86	2.85	2.85	2.72	2.79	2.74	2.99	2.99	2.99	2.97	3	2.96	2.94	2.93	2.93	2.87	2.88	2.87	2.86	2.77	2.76	2.67	2.66	2.65	2.99	2.99	2.98	2.98	2.98	2.97	2.93	2.93	2.98	2.86	2.87	2.86	2.77
1238	3	3	2.98	3	3	2.99	2.96	2.96	2.95	2.96	2.91	2.96	2.85	2.85	2.85	2.71	2.78	2.73	2.99	2.99	2.99	2.97	3	2.96	2.94	2.93	2.93	2.87	2.88	2.87	2.86	2.76	2.76	2.67	2.66	2.65	2.99	2.99	2.98	2.98	2.98	2.97	2.93	2.93	2.98	2.86	2.87	2.85	2.77
1248	3	3	2.98	3	3	2.99	2.96	2.96	2.95	2.96	2.91	2.96	2.85	2.85	2.85	2.71	2.78	2.73	2.99	2.99	2.99	2.97	3	2.96	2.94	2.93	2.93	2.87	2.87	2.87	2.86	2.76	2.76	2.67	2.65	2.65	2.99	2.99	2.98	2.98	2.98	2.97	2.93	2.93	2.98	2.86	2.87	2.85	2.76
1258	3	3	2.98	3	3	2.99	2.96	2.96	2.95	2.96	2.91	2.96	2.85	2.85	2.85	2.71	2.78	2.73	2.99	2.99	2.99	2.97	3	2.96	2.94	2.92	2.93	2.86	2.87	2.86	2.86	2.76	2.75	2.66	2.65	2.64	2.99	2.99	2.98	2.98	2.98	2.97	2.93	2.93	2.98	2.86	2.87	2.85	2.76
1268	3	3	2.98	3	3	2.99	2.96	2.96	2.95	2.96	2.91	2.96	2.85	2.84	2.85	2.71	2.77	2.72	2.99	2.99	2.99	2.97	3	2.96	2.94	2.92	2.93	2.86	2.87	2.86	2.85	2.76	2.75	2.66	2.65	2.64	2.99	2.99	2.98	2.98	2.98	2.97	2.93	2.93	2.98	2.86	2.87	2.85	2.76
1278	3	3	2.98	3	3	2.99	2.96	2.96	2.95	2.96	2.91	2.96	2.84	2.84	2.84	2.7	2.77	2.72	2.99	2.99	2.99	2.97	3	2.95	2.94	2.92	2.93	2.86	2.87	2.86	2.85	2.76	2.75	2.66	2.65	2.64	2.99	2.99	2.98	2.98	2.98	2.97	2.92	2.93	2.98	2.85	2.87	2.85	2.76
1288	3	3	2.98	3	3	2.99	2.96	2.95	2.95	2.96	2.91	2.96	2.84	2.84	2.84	2.7	2.77	2.72	2.99	2.99	2.99	2.97	3	2.95	2.94	2.92	2.93	2.86	2.87	2.86	2.85	2.75	2.75	2.66	2.64	2.64	2.99	2.99	2.98	2.98	2.98	2.97	2.92	2.93	2.98	2.85	2.86	2.84	2.75
1298	3	3	2.98	3	3	2.99	2.96	2.95	2.95	2.96	2.9	2.95	2.84	2.84	2.84	2.7	2.76	2.71	2.99	2.99	2.99	2.97	3	2.95	2.94	2.92	2.92	2.86	2.86	2.86	2.84	2.75	2.75	2.65	2.64	2.63	2.99	2.99	2.98	2.98	2.98	2.97	2.92	2.93	2.98	2.85	2.86	2.84	2.75
1309	3	3	2.98	3	3	2.98	2.96	2.95	2.95	2.96	2.9	2.95	2.84	2.83	2.84	2.7	2.76	2.71	2.99	2.99	2.99	2.97	3	2.95	2.94	2.92	2.92	2.85	2.86	2.85	2.84	2.75	2.74	2.65	2.64	2.63	2.99	2.99	2.98	2.98	2.98	2.97	2.92	2.93	2.98	2.85	2.86	2.84	2.75
1319	3	3	2.98	3	3	2.98	2.96	2.95	2.95	2.96	2.9	2.95	2.83	2.83	2.83	2.7	2.76	2.71	2.99	2.99	2.99	2.97	3	2.95	2.94	2.92	2.92	2.85	2.86	2.85	2.84	2.75	2.74	2.65	2.64	2.63	2.99	2.99	2.98	2.98	2.98	2.97	2.92	2.92	2.98	2.85	2.86	2.84	2.75
1329	3	3	2.98	3	3	2.98	2.96	2.95	2.95	2.96	2.9	2.95	2.83	2.83	2.83	2.69	2.75	2.71	2.99	2.99	2.99	2.97	3	2.95	2.93	2.92	2.92	2.85	2.86	2.85	2.84	2.74	2.74	2.65	2.64	2.63	2.99	2.99	2.98	2.98	2.98	2.97	2.92	2.92	2.98	2.84	2.86	2.84	2.74
1339	3	3	2.98	3	3	2.98	2.95	2.95	2.94	2.95	2.9	2.95	2.83	2.83	2.83	2.69	2.75	2.7	2.99	2.99	2.99	2.97	3	2.95	2.93	2.92	2.92	2.85	2.86	2.85	2.83	2.74	2.74	2.65	2.63	2.63	2.99	2.99	2.98	2.98	2.98	2.97	2.92	2.92	2.98	2.84	2.86	2.84	2.74
1349	3	3	2.98	3	3	2.98	2.95	2.95	2.94	2.95	2.9	2.95	2.83	2.82	2.83	2.69	2.75	2.7	2.99	2.99	2.99	2.97	3	2.95	2.93	2.92	2.92	2.85	2.86	2.85	2.83	2.74	2.74	2.64	2.63	2.62	2.99	2.99	2.98	2.98	2.98	2.97	2.92	2.92	2.98	2.84	2.85	2.83	2.74
1359	3	3	2.98	3	3	2.98	2.95	2.95	2.94	2.95	2.9	2.95	2.82	2.82	2.82	2.69	2.75	2.7	2.99	2.99	2.99	2.97	3	2.95	2.93	2.92	2.92	2.84	2.85	2.85	2.83	2.74	2.74	2.64	2.63	2.62	2.99	2.99	2.98	2.98	2.98	2.97	2.92	2.92	2.98	2.84	2.85	2.83	2.74
1370	3	3	2.98	3	3	2.98	2.95	2.95	2.94	2.95	2.89	2.95	2.82	2.82	2.82	2.69	2.74	2.7	2.99	2.99	2.99	2.97	3	2.95	2.93	2.91	2.92	2.84	2.85	2.84	2.83	2.74	2.73	2.64	2.63	2.62	2.99	2.98	2.98	2.98	2.98	2.97	2.92	2.92	2.98	2.84	2.85	2.83	2.74
1380	3	3	2.98	3	3	2.98	2.95	2.95	2.94	2.95	2.89	2.94	2.82	2.82	2.82	2.68	2.74	2.69	2.99	2.99	2.99	2.97	3	2.95	2.93	2.91	2.92	2.84	2.85	2.84	2.82	2.73	2.73	2.64	2.63	2.62	2.99	2.98	2.98	2.98	2.98	2.97	2.92	2.92	2.98	2.83	2.85	2.83	2.73
1390	3	3	2.98	3	3	2.98	2.95	2.95	2.94	2.95	2.89	2.94	2.82	2.81	2.82	2.68	2.74	2.69	2.99	2.99	2.99	2.97	3	2.95	2.93	2.91	2.92	2.84	2.85	2.84	2.82	2.73	2.73	2.64	2.62	2.62	2.99	2.98	2.98	2.98	2.98	2.97	2.91	2.92	2.98	2.83	2.85	2.83	2.73
1400	3	3	2.98	3	3	2.98	2.95	2.95	2.94	2.95	2.89	2.94	2.81	2.81	2.82	2.68	2.74	2.69	2.99	2.99	2.99	2.97	3	2.95	2.93	2.91	2.92	2.84	2.85	2.84	2.82	2.73	2.73	2.63	2.62	2.61	2.99	2.98	2.98	2.98	2.98	2.97	2.91	2.92	2.98	2.83	2.84	2.83	2.73
1410	3	3	2.98	3	3	2.98	2.95	2.95	2.94	2.95	2.89	2.94	2.81	2.81	2.81	2.68	2.73	2.69	2.99	2.99	2.99	2.97	3	2.95	2.93	2.91	2.91	2.84	2.84	2.84	2.82	2.73	2.73	2.63	2.62	2.61	2.99	2.98	2.98	2.98	2.97	2.97	2.91	2.92	2.97	2.83	2.84	2.82	2.73
1420	3	3	2.98	3	3	2.98	2.95	2.94	2.94	2.95	2.89	2.94	2.81	2.81	2.81	2.68	2.73	2.68	2.99	2.99	2.99	2.97	3	2.95	2.93	2.91	2.91	2.84	2.84	2.84	2.81	2.73	2.73	2.63	2.62	2.61	2.99	2.98	2.98	2.98	2.97	2.97	2.91	2.92	2.97	2.83	2.84	2.82	2.73
1430	3	3	2.98	3	3	2.98	2.95	2.94	2.94	2.95	2.89	2.94	2.81	2.8	2.81	2.67	2.73	2.68	2.99	2.99	2.99	2.97	3	2.95	2.93	2.91	2.91	2.83	2.84	2.83	2.81	2.73	2.73	2.63	2.62	2.61	2.99	2.98	2.97	2.98	2.97	2.97	2.91	2.91	2.97	2.83	2.84	2.82	2.73
1441	3	3	2.98	3	3	2.98	2.95	2.94	2.94	2.95	2.88	2.93	2.8	2.8	2.81	2.67	2.73	2.68	2.98	2.99	2.99	2.97	3	2.95	2.93	2.91	2.91	2.83	2.84	2.83	2.81	2.72	2.72	2.63	2.61	2.61	2.99	2.98	2.97	2.98	2.97	2.97	2.91	2.91	2.97	2.82	2.84	2.82	2.72
1451	3	3	2.98	3	3	2.98	2.95	2.94	2.94	2.95	2.88	2.93	2.8	2.8	2.81	2.67	2.72	2.68	2.99	2.99	2.99	2.96	2.99	2.95	2.92	2.91	2.91	2.83	2.84	2.83	2.81	2.72	2.72	2.62	2.61	2.61	2.99	2.98	2.97	2.98	2.97	2.97	2.91	2.91	2.97	2.82	2.84	2.82	2.72
1461	3	3	2.98	3	2.99	2.98	2.95	2.94	2.93	2.95	2.88	2.93	2.8	2.8	2.8	2.67	2.72	2.68	2.99	2.99	2.99	2.96	2.99	2.95	2.92	2.91	2.91	2.83	2.84	2.83	2.8	2.72	2.72	2.62	2.61	2.6	2.99	2.98	2.97	2.98	2.97	2.97	2.91	2.91	2.97	2.82	2.83	2.82	2.72
1471	3	3	2.98	3	2.99	2.98	2.95	2.94	2.93	2.95	2.88	2.93	2.8	2.8	2.8	2.67	2.72	2.67	2.99	2.99	2.99	2.96	2.99	2.95	2.92	2.91	2.91	2.83	2.84	2.83	2.8	2.72	2.72	2.62	2.61	2.6	2.99	2.98	2.97	2.98	2.97	2.97	2.91	2.91	2.97	2.82	2.83	2.82	2.72
1481	3	3	2.98	3	2.99	2.98	2.94	2.94	2.93	2.94	2.88	2.93	2.8	2.79	2.8	2.66	2.72	2.67	2.98	2.99	2.99	2.96	2.99	2.95	2.92	2.9	2.91	2.83	2.83	2.83	2.8	2.72	2.72	2.62	2.61	2.6	2.99	2.98	2.97	2.98	2.97	2.96	2.91	2.91	2.97	2.82	2.83	2.81	2.72
1491	3	3	2.98	3	2.99	2.98	2.94	2.94	2.93	2.94	2.88	2.93	2.79	2.79	2.8	2.66	2.72	2.67	2.98	2.99	2.99	2.96	2.99	2.95	2.92	2.9	2.91	2.82	2.83	2.82	2.8	2.72	2.72	2.62	2.61	2.6	2.99	2.98	2.97	2.98	2.97	2.96	2.91	2.91	2.97	2.82	2.83	2.81	2.72
1501	3	3	2.98	3	2.99	2.98	2.94	2.94	2.93	2.94	2.88	2.93	2.79	2.79	2.8	2.66	2.71	2.67	2.98	2.99	2.99	2.96	2.99	2.95	2.92	2.9	2.91	2.82	2.83	2.82	2.8	2.71	2.72	2.62	2.6	2.6	2.99	2.98	2.97	2.98	2.97	2.96	2.9	2.91	2.97	2.81	2.83	2.81	2.71
1512	3	2.99	2.98	3	2.99	2.98	2.94	2.94	2.93	2.94	2.87	2.92	2.79	2.79	2.8	2.66	2.71	2.67	2.98	2.99	2.99	2.96	2.99	2.94	2.92	2.9	2.9	2.82	2.83	2.82	2.79	2.71	2.71	2.61	2.6	2.6	2.99	2.98	2.97	2.98	2.97	2.96	2.9	2.91	2.97	2.81	2.83	2.81	2.71
1522	3	2.99	2.97	3	2.99	2.98	2.94	2.94	2.93	2.94	2.87	2.92	2.79	2.79	2.79	2.66	2.71	2.66	2.98	2.99	2.99	2.96	2.99	2.94	2.92	2.9	2.9	2.82	2.83	2.82	2.79	2.71	2.71	2.61	2.6	2.59	2.99	2.98	2.97	2.98	2.97	2.96	2.9	2.91	2.97	2.81	2.83	2.81	2.71
1532	3	2.99	2.97	3	2.99	2.98	2.94	2.94	2.93	2.94	2.87	2.92	2.79	2.79	2.79	2.66	2.71	2.66	2.98	2.98	2.99	2.96	2.99	2.94	2.92	2.9	2.9	2.82	2.83	2.82	2.79	2.71	2.71	2.61	2.6	2.59	2.99	2.98	2.97	2.98	2.97	2.96	2.9	2.91	2.97	2.81	2.82	2.81	2.71
1542	3	2.99	2.97	3	2.99	2.98	2.94	2.94	2.93	2.94	2.87	2.92	2.78	2.78	2.79	2.65	2.71	2.66	2.98	2.98	2.98	2.96	2.99	2.94	2.92	2.9	2.9	2.82	2.82	2.82	2.79	2.71	2.71	2.61	2.6	2.59	2.99	2.98	2.97	2.98	2.97	2.96	2.9	2.9	2.97	2.81	2.82	2.8	2.71
1552	3	2.99	2.97	3	2.99	2.98	2.94	2.94	2.93	2.94	2.87	2.92	2.78	2.78	2.79	2.65	2.71	2.66	2.98	2.98	2.98	2.96	2.99	2.94	2.92	2.9	2.9	2.82	2.82	2.82	2.79	2.71	2.71	2.61	2.6	2.59	2.99	2.98	2.97	2.98	2.97	2.96	2.9	2.9	2.97	2.81	2.82	2.8	2.71
1562	3	2.99	2.97	3	2.99	2.98	2.94	2.93	2.93	2.94	2.87	2.92	2.78	2.78	2.79	2.65	2.7	2.66	2.98	2.98	2.98	2.96	2.99	2.94	2.91	2.9	2.9	2.81	2.82	2.81	2.78	2.71	2.71	2.61	2.59	2.59	2.99	2.98	2.97	2.98	2.97	2.96	2.9	2.9	2.97	2.8	2.82	2.8	2.71
1572	3	2.99	2.97	3	2.99	2.97	2.94	2.93	2.93	2.94	2.86	2.92	2.78	2.78	2.79	2.65	2.7	2.65	2.98	2.98	2.98	2.96	2.99	2.94	2.91	2.9	2.9	2.81	2.82	2.81	2.78	2.7	2.71	2.6	2.59	2.59	2.99	2.98	2.97	2.98	2.97	2.96	2.9	2.9	2.96	2.8	2.82	2.8	2.7
1583	3	2.99	2.97	3	2.99	2.97	2.94	2.93	2.93	2.94	2.86	2.91	2.78	2.78	2.79	2.65	2.7	2.65	2.98	2.98	2.98	2.96	2.99	2.94	2.91	2.9	2.9	2.81	2.82	2.81	2.78	2.7	2.71	2.6	2.59	2.58	2.99	2.98	2.97	2.98	2.97	2.96	2.9	2.9	2.96	2.8	2.82	2.8	2.7
1593	3	2.99	2.97	3	2.99	2.97	2.94	2.93	2.92	2.94	2.86	2.91	2.78	2.78	2.78	2.65	2.7	2.65	2.98	2.98	2.98	2.96	2.99	2.94	2.91	2.89	2.9	2.81	2.82	2.81	2.78	2.7	2.7	2.6	2.59	2.58	2.99	2.98	2.97	2.98	2.97	2.96	2.9	2.9	2.96	2.8	2.82	2.8	2.7
1603	3	2.99	2.97	3	2.99	2.97	2.94	2.93	2.92	2.94	2.86	2.91	2.77	2.77	2.78	2.65	2.7	2.65	2.98	2.98	2.98	2.96	2.99	2.94	2.91	2.89	2.9	2.81	2.82	2.81	2.78	2.7	2.7	2.6	2.59	2.58	2.99	2.98	2.97	2.98	2.97	2.96	2.89	2.9	2.96	2.8	2.81	2.8	2.7
1613	3	2.99	2.97	3	2.99	2.97	2.94	2.93	2.92	2.94	2.86	2.91	2.77	2.77	2.78	2.64	2.7	2.65	2.98	2.98	2.98	2.96	2.99	2.94	2.91	2.89	2.9	2.81	2.81	2.81	2.77	2.7	2.7	2.6	2.59	2.58	2.99	2.98	2.97	2.98	2.97	2.96	2.89	2.9	2.96	2.8	2.81	2.8	2.7
1623	3	2.99	2.97	3	2.99	2.97	2.93	2.93	2.92	2.93	2.86	2.91	2.77	2.77	2.78	2.64	2.69	2.64	2.98	2.98	2.98	2.96	2.99	2.94	2.91	2.89	2.9	2.81	2.81	2.81	2.77	2.7	2.7	2.6	2.58	2.58	2.99	2.98	2.97	2.98	2.97	2.96	2.89	2.9	2.96	2.8	2.81	2.79	2.7
1633	3	2.99	2.97	3	2.99	2.97	2.93	2.93	2.92	2.93	2.86	2.91	2.77	2.77	2.78	2.64	2.69	2.64	2.98	2.98	2.98	2.96	2.99	2.94	2.91	2.89	2.89	2.8	2.81	2.8	2.77	2.7	2.7	2.6	2.58	2.58	2.99	2.98	2.97	2.98	2.97	2.96	2.89	2.9	2.96	2.79	2.81	2.79	2.7
1643	3	2.99	2.97	3	2.99	2.97	2.93	2.93	2.92	2.93	2.86	2.91	2.77	2.77	2.78	2.64	2.69	2.64	2.98	2.98	2.98	2.96	2.99	2.94	2.91	2.89	2.89	2.8	2.81	2.8	2.77	2.7	2.7	2.59	2.58	2.58	2.99	2.98	2.97	2.98	2.97	2.96	2.89	2.9	2.96	2.79	2.81	2.79	2.69
1654	3	2.99	2.97	3	2.99	2.97	2.93	2.93	2.92	2.93	2.85	2.9	2.77	2.77	2.78	2.64	2.69	2.64	2.98	2.98	2.98	2.96	2.99	2.94	2.91	2.89	2.89	2.8	2.81	2.8	2.77	2.69	2.7	2.59	2.58	2.57	2.99	2.98	2.97	2.98	2.97	2.96	2.89	2.9	2.96	2.79	2.81	2.79	2.69
1664	3	2.99	2.97	3	2.99	2.97	2.93	2.93	2.92	2.93	2.85	2.9	2.76	2.76	2.77	2.64	2.69	2.64	2.98	2.98	2.98	2.96	2.99	2.94	2.91	2.89	2.89	2.8	2.81	2.8	2.77	2.69	2.7	2.59	2.58	2.57	2.99	2.98	2.97	2.98	2.97	2.96	2.89	2.89	2.96	2.79	2.81	2.79	2.69
1674	3	2.99	2.97	3	2.99	2.97	2.93	2.93	2.92	2.93	2.85	2.9	2.76	2.76	2.77	2.64	2.69	2.64	2.98	2.98	2.98	2.96	2.99	2.94	2.9	2.89	2.89	2.8	2.81	2.8	2.76	2.69	2.7	2.59	2.58	2.57	2.99	2.98	2.97	2.98	2.97	2.96	2.89	2.89	2.96	2.79	2.8	2.79	2.69
1684	3	2.99	2.97	3	2.99	2.97	2.93	2.93	2.92	2.93	2.85	2.9	2.76	2.76	2.77	2.63	2.68	2.63	2.98	2.98	2.98	2.96	2.99	2.94	2.9	2.89	2.89	2.8	2.8	2.8	2.76	2.69	2.7	2.59	2.58	2.57	2.99	2.98	2.97	2.97	2.97	2.96	2.89	2.89	2.96	2.79	2.8	2.79	2.69
1694	3	2.99	2.97	3	2.99	2.97	2.93	2.92	2.92	2.93	2.85	2.9	2.76	2.76	2.77	2.63	2.68	2.63	2.98	2.98	2.98	2.96	2.99	2.94	2.9	2.89	2.89	2.8	2.8	2.8	2.76	2.69	2.69	2.59	2.58	2.57	2.99	2.98	2.97	2.97	2.97	2.96	2.89	2.89	2.96	2.79	2.8	2.79	2.69
1704	3	2.99	2.97	3	2.99	2.97	2.93	2.92	2.92	2.93	2.85	2.9	2.76	2.76	2.77	2.63	2.68	2.63	2.98	2.98	2.98	2.96	2.99	2.94	2.9	2.88	2.89	2.8	2.8	2.8	2.76	2.69	2.69	2.59	2.57	2.57	2.99	2.98	2.97	2.97	2.97	2.96	2.89	2.89	2.95	2.78	2.8	2.78	2.69
1714	3	2.99	2.97	3	2.99	2.97	2.93	2.92	2.91	2.93	2.85	2.9	2.76	2.76	2.77	2.63	2.68	2.63	2.98	2.98	2.98	2.95	2.99	2.94	2.9	2.88	2.89	2.79	2.8	2.79	2.76	2.69	2.69	2.58	2.57	2.57	2.99	2.98	2.97	2.97	2.97	2.96	2.88	2.89	2.95	2.78	2.8	2.78	2.69
1725	3	2.99	2.97	3	2.99	2.97	2.93	2.92	2.91	2.93	2.85	2.89	2.75	2.76	2.77	2.63	2.68	2.63	2.98	2.98	2.98	2.95	2.99	2.94	2.9	2.88	2.89	2.79	2.8	2.79	2.76	2.69	2.69	2.58	2.57	2.57	2.99	2.98	2.97	2.97	2.97	2.96	2.88	2.89	2.95	2.78	2.8	2.78	2.68
1735	3	2.99	2.97	3	2.99	2.97	2.93	2.92	2.91	2.93	2.85	2.89	2.75	2.75	2.77	2.63	2.68	2.63	2.98	2.98	2.98	2.95	2.99	2.94	2.9	2.88	2.89	2.79	2.8	2.79	2.76	2.69	2.69	2.58	2.57	2.56	2.99	2.98	2.97	2.97	2.96	2.96	2.88	2.89	2.95	2.78	2.8	2.78	2.68
1745	3	2.99	2.97	3	2.99	2.97	2.93	2.92	2.91	2.93	2.84	2.89	2.75	2.75	2.76	2.63	2.68	2.62	2.98	2.98	2.98	2.95	2.99	2.94	2.9	2.88	2.88	2.79	2.8	2.79	2.75	2.68	2.69	2.58	2.57	2.56	2.99	2.98	2.97	2.97	2.96	2.96	2.88	2.89	2.95	2.78	2.8	2.78	2.68
1755	3	2.99	2.97	3	2.99	2.97	2.92	2.92	2.91	2.92	2.84	2.89	2.75	2.75	2.76	2.63	2.67	2.62	2.98	2.98	2.98	2.95	2.99	2.94	2.9	2.88	2.88	2.79	2.8	2.79	2.75	2.68	2.69	2.58	2.57	2.56	2.99	2.98	2.97	2.97	2.96	2.96	2.88	2.89	2.95	2.78	2.8	2.78	2.68
1765	3	2.99	2.97	3	2.99	2.97	2.92	2.92	2.91	2.92	2.84	2.89	2.75	2.75	2.76	2.62	2.67	2.62	2.98	2.98	2.98	2.95	2.99	2.94	2.9	2.88	2.88	2.79	2.8	2.79	2.75	2.68	2.69	2.58	2.57	2.56	2.99	2.98	2.97	2.97	2.96	2.96	2.88	2.89	2.95	2.78	2.79	2.78	2.68
1775	3	2.99	2.97	3	2.99	2.97	2.92	2.92	2.91	2.92	2.84	2.89	2.75	2.75	2.76	2.62	2.67	2.62	2.98	2.98	2.98	2.95	2.99	2.93	2.9	2.88	2.88	2.79	2.79	2.79	2.75	2.68	2.69	2.58	2.57	2.56	2.99	2.98	2.97	2.97	2.96	2.96	2.88	2.88	2.95	2.78	2.79	2.78	2.68
1785	3	2.99	2.97	3	2.99	2.97	2.92	2.92	2.91	2.92	2.84	2.89	2.75	2.75	2.76	2.62	2.67	2.62	2.98	2.98	2.98	2.95	2.99	2.93	2.89	2.88	2.88	2.79	2.79	2.79	2.75	2.68	2.69	2.58	2.56	2.56	2.99	2.98	2.97	2.97	2.96	2.95	2.88	2.88	2.95	2.77	2.79	2.78	2.68
1796	3	2.99	2.97	3	2.99	2.96	2.92	2.92	2.91	2.92	2.84	2.89	2.75	2.75	2.76	2.62	2.67	2.62	2.98	2.98	2.98	2.95	2.98	2.93	2.89	2.88	2.88	2.78	2.79	2.79	2.75	2.68	2.68	2.57	2.56	2.56	2.99	2.98	2.97	2.97	2.96	2.95	2.88	2.88	2.95	2.77	2.79	2.77	2.68
1806	3	2.99	2.97	3	2.99	2.96	2.92	2.92	2.91	2.92	2.84	2.88	2.74	2.75	2.76	2.62	2.67	2.61	2.98	2.98	2.98	2.95	2.98	2.93	2.89	2.88	2.88	2.78	2.79	2.78	2.75	2.68	2.68	2.57	2.56	2.56	2.99	2.98	2.97	2.97	2.96	2.95	2.88	2.88	2.95	2.77	2.79	2.77	2.68
1816	3	2.99	2.97	3	2.99	2.96	2.92	2.92	2.91	2.92	2.84	2.88	2.74	2.75	2.76	2.62	2.67	2.61	2.98	2.98	2.98	2.95	2.98	2.93	2.89	2.88	2.88	2.78	2.79	2.78	2.74	2.68	2.68	2.57	2.56	2.55	2.99	2.98	2.97	2.97	2.96	2.95	2.88	2.88	2.95	2.77	2.79	2.77	2.67
1826	3	2.99	2.97	3	2.99	2.96	2.92	2.91	2.91	2.92	2.83	2.88	2.74	2.74	2.76	2.62	2.67	2.61	2.98	2.98	2.98	2.95	2.98	2.93	2.89	2.87	2.88	2.78	2.79	2.78	2.74	2.68	2.68	2.57	2.56	2.55	2.99	2.98	2.97	2.97	2.96	2.95	2.87	2.88	2.95	2.77	2.79	2.77	2.67
1836	3	2.99	2.97	2.99	2.99	2.96	2.92	2.91	2.91	2.92	2.83	2.88	2.74	2.74	2.76	2.62	2.66	2.61	2.98	2.98	2.98	2.95	2.98	2.93	2.89	2.87	2.88	2.78	2.79	2.78	2.74	2.67	2.68	2.57	2.56	2.55	2.99	2.98	2.97	2.97	2.96	2.95	2.87	2.88	2.94	2.77	2.79	2.77	2.67
1846	3	2.99	2.97	2.99	2.99	2.96	2.92	2.91	2.9	2.92	2.83	2.88	2.74	2.74	2.75	2.61	2.66	2.61	2.98	2.98	2.98	2.95	2.98	2.93	2.89	2.87	2.88	2.78	2.79	2.78	2.74	2.67	2.68	2.57	2.56	2.55	2.99	2.98	2.97	2.97	2.96	2.95	2.87	2.88	2.94	2.77	2.79	2.77	2.67
1856	3	2.99	2.97	2.99	2.99	2.96	2.92	2.91	2.9	2.92	2.83	2.88	2.74	2.74	2.75	2.61	2.66	2.61	2.98	2.98	2.98	2.95	2.98	2.93	2.89	2.87	2.88	2.78	2.79	2.78	2.74	2.67	2.68	2.57	2.56	2.55	2.99	2.98	2.97	2.97	2.96	2.95	2.87	2.88	2.94	2.77	2.78	2.77	2.67
1867	3	2.99	2.97	2.99	2.99	2.96	2.92	2.91	2.9	2.92	2.83	2.88	2.74	2.74	2.75	2.61	2.66	2.61	2.98	2.98	2.98	2.95	2.98	2.93	2.89	2.87	2.87	2.78	2.78	2.78	2.74	2.67	2.68	2.57	2.55	2.55	2.99	2.98	2.97	2.97	2.96	2.95	2.87	2.88	2.94	2.77	2.78	2.77	2.67
1877	3	2.99	2.97	2.99	2.99	2.96	2.92	2.91	2.9	2.92	2.83	2.88	2.74	2.74	2.75	2.61	2.66	2.6	2.98	2.98	2.98	2.95	2.98	2.93	2.89	2.87	2.87	2.78	2.78	2.78	2.74	2.67	2.68	2.57	2.55	2.55	2.99	2.98	2.97	2.97	2.96	2.95	2.87	2.88	2.94	2.76	2.78	2.77	2.67
1887	3	2.99	2.97	2.99	2.99	2.96	2.92	2.91	2.9	2.92	2.83	2.87	2.73	2.74	2.75	2.61	2.66	2.6	2.98	2.98	2.98	2.95	2.98	2.93	2.89	2.87	2.87	2.78	2.78	2.78	2.74	2.67	2.68	2.56	2.55	2.55	2.99	2.98	2.97	2.97	2.96	2.95	2.87	2.88	2.94	2.76	2.78	2.77	2.67
1897	3	2.99	2.97	2.99	2.98	2.96	2.91	2.91	2.9	2.91	2.83	2.87	2.73	2.74	2.75	2.61	2.66	2.6	2.98	2.98	2.98	2.95	2.98	2.93	2.89	2.87	2.87	2.78	2.78	2.78	2.73	2.67	2.68	2.56	2.55	2.54	2.99	2.98	2.97	2.97	2.96	2.95	2.87	2.88	2.94	2.76	2.78	2.77	2.67
1907	3	2.99	2.97	2.99	2.98	2.96	2.91	2.91	2.9	2.91	2.83	2.87	2.73	2.74	2.75	2.61	2.66	2.6	2.98	2.98	2.98	2.95	2.98	2.93	2.88	2.87	2.87	2.77	2.78	2.77	2.73	2.67	2.68	2.56	2.55	2.54	2.99	2.98	2.97	2.97	2.96	2.95	2.87	2.87	2.94	2.76	2.78	2.76	2.67
1917	3	2.99	2.97	2.99	2.98	2.96	2.91	2.91	2.9	2.91	2.83	2.87	2.73	2.73	2.75	2.61	2.66	2.6	2.98	2.98	2.98	2.95	2.98	2.93	2.88	2.87	2.87	2.77	2.78	2.77	2.73	2.67	2.67	2.56	2.55	2.54	2.99	2.98	2.97	2.97	2.96	2.95	2.87	2.87	2.94	2.76	2.78	2.76	2.66
1927	3	2.99	2.97	2.99	2.98	2.96	2.91	2.91	2.9	2.91	2.82	2.87	2.73	2.73	2.75	2.61	2.65	2.6	2.98	2.98	2.98	2.95	2.98	2.93	2.88	2.87	2.87	2.77	2.78	2.77	2.73	2.67	2.67	2.56	2.55	2.54	2.99	2.98	2.97	2.97	2.96	2.95	2.87	2.87	2.94	2.76	2.78	2.76	2.66
1938	3	2.99	2.97	2.99	2.98	2.96	2.91	2.91	2.9	2.91	2.82	2.87	2.73	2.73	2.75	2.6	2.65	2.6	2.98	2.98	2.98	2.95	2.98	2.93	2.88	2.87	2.87	2.77	2.78	2.77	2.73	2.66	2.67	2.56	2.55	2.54	2.99	2.98	2.97	2.97	2.96	2.95	2.87	2.87	2.94	2.76	2.78	2.76	2.66
1948	3	2.99	2.97	2.99	2.98	2.96	2.91	2.91	2.9	2.91	2.82	2.87	2.73	2.73	2.74	2.6	2.65	2.6	2.98	2.98	2.98	2.95	2.98	2.93	2.88	2.86	2.87	2.77	2.78	2.77	2.73	2.66	2.67	2.56	2.55	2.54	2.99	2.98	2.97	2.97	2.96	2.95	2.86	2.87	2.94	2.76	2.78	2.76	2.66
1958	3	2.99	2.97	2.99	2.98	2.96	2.91	2.9	2.9	2.91	2.82	2.87	2.73	2.73	2.74	2.6	2.65	2.59	2.98	2.98	2.98	2.95	2.98	2.93	2.88	2.86	2.87	2.77	2.78	2.77	2.73	2.66	2.67	2.56	2.54	2.54	2.99	2.98	2.97	2.97	2.96	2.95	2.86	2.87	2.94	2.76	2.78	2.76	2.66
1968	3	2.99	2.97	2.99	2.98	2.96	2.91	2.9	2.9	2.91	2.82	2.87	2.73	2.73	2.74	2.6	2.65	2.59	2.98	2.98	2.98	2.95	2.98	2.93	2.88	2.86	2.87	2.77	2.78	2.77	2.73	2.66	2.67	2.56	2.54	2.54	2.99	2.98	2.97	2.97	2.96	2.95	2.86	2.87	2.93	2.75	2.77	2.76	2.66
1978	3	2.99	2.97	2.99	2.98	2.96	2.91	2.9	2.9	2.91	2.82	2.86	2.73	2.73	2.74	2.6	2.65	2.59	2.98	2.98	2.98	2.94	2.98	2.93	2.88	2.86	2.87	2.77	2.77	2.77	2.73	2.66	2.67	2.55	2.54	2.54	2.99	2.98	2.97	2.97	2.96	2.95	2.86	2.87	2.93	2.75	2.77	2.76	2.66
1988	3	2.99	2.97	2.99	2.98	2.96	2.91	2.9	2.9	2.91	2.82	2.86	2.72	2.73	2.74	2.6	2.65	2.59	2.98	2.98	2.98	2.94	2.98	2.93	2.88	2.86	2.87	2.77	2.77	2.77	2.72	2.66	2.67	2.55	2.54	2.54	2.99	2.98	2.97	2.97	2.96	2.95	2.86	2.87	2.93	2.75	2.77	2.76	2.66
1998	3	2.99	2.97	2.99	2.98	2.96	2.91	2.9	2.89	2.91	2.82	2.86	2.72	2.73	2.74	2.6	2.65	2.59	2.98	2.98	2.98	2.94	2.98	2.93	2.88	2.86	2.86	2.77	2.77	2.77	2.72	2.66	2.67	2.55	2.54	2.54	2.99	2.98	2.96	2.97	2.96	2.95	2.86	2.87	2.93	2.75	2.77	2.76	2.66
2009	3	2.99	2.97	2.99	2.98	2.95	2.91	2.9	2.89	2.91	2.82	2.86	2.72	2.73	2.74	2.6	2.65	2.59	2.98	2.98	2.98	2.94	2.98	2.93	2.88	2.86	2.86	2.77	2.77	2.77	2.72	2.66	2.67	2.55	2.54	2.53	2.99	2.98	2.96	2.97	2.96	2.95	2.86	2.87	2.93	2.75	2.77	2.76	2.66
2019	3	2.99	2.97	2.99	2.98	2.95	2.91	2.9	2.89	2.91	2.82	2.86	2.72	2.73	2.74	2.6	2.65	2.59	2.98	2.98	2.98	2.94	2.98	2.93	2.88	2.86	2.86	2.77	2.77	2.76	2.72	2.66	2.67	2.55	2.54	2.53	2.99	2.98	2.96	2.97	2.96	2.95	2.86	2.87	2.93	2.75	2.77	2.76	2.66
2029	3	2.99	2.97	2.99	2.98	2.95	2.91	2.9	2.89	2.91	2.82	2.86	2.72	2.72	2.74	2.6	2.64	2.59	2.98	2.98	2.98	2.94	2.98	2.93	2.88	2.86	2.86	2.76	2.77	2.76	2.72	2.66	2.67	2.55	2.54	2.53	2.99	2.98	2.96	2.97	2.96	2.95	2.86	2.86	2.93	2.75	2.77	2.75	2.65
2039	3	2.99	2.97	2.99	2.98	2.95	2.9	2.9	2.89	2.9	2.81	2.86	2.72	2.72	2.74	2.59	2.64	2.58	2.98	2.98	2.98	2.94	2.98	2.92	2.87	2.86	2.86	2.76	2.77	2.76	2.72	2.66	2.67	2.55	2.54	2.53	2.99	2.97	2.96	2.97	2.96	2.95	2.86	2.86	2.93	2.75	2.77	2.75	2.65
2049	3	2.99	2.97	2.99	2.98	2.95	2.9	2.9	2.89	2.9	2.81	2.86	2.72	2.72	2.74	2.59	2.64	2.58	2.98	2.98	2.98	2.94	2.98	2.92	2.87	2.86	2.86	2.76	2.77	2.76	2.72	2.66	2.67	2.55	2.54	2.53	2.99	2.97	2.96	2.97	2.96	2.95	2.86	2.86	2.93	2.75	2.77	2.75	2.65
2059	3	2.99	2.97	2.99	2.98	2.95	2.9	2.9	2.89	2.9	2.81	2.86	2.72	2.72	2.74	2.59	2.64	2.58	2.98	2.98	2.98	2.94	2.98	2.92	2.87	2.86	2.86	2.76	2.77	2.76	2.72	2.65	2.66	2.55	2.53	2.53	2.99	2.97	2.96	2.97	2.96	2.95	2.86	2.86	2.93	2.75	2.77	2.75	2.65
2069	3	2.99	2.97	2.99	2.98	2.95	2.9	2.9	2.89	2.9	2.81	2.85	2.72	2.72	2.73	2.59	2.64	2.58	2.98	2.98	2.98	2.94	2.98	2.92	2.87	2.86	2.86	2.76	2.77	2.76	2.72	2.65	2.66	2.55	2.53	2.53	2.99	2.97	2.96	2.97	2.96	2.95	2.85	2.86	2.93	2.75	2.77	2.75	2.65
2080	3	2.99	2.97	2.99	2.98	2.95	2.9	2.9	2.89	2.9	2.81	2.85	2.72	2.72	2.73	2.59	2.64	2.58	2.98	2.98	2.98	2.94	2.97	2.92	2.87	2.86	2.86	2.76	2.77	2.76	2.71	2.65	2.66	2.55	2.53	2.53	2.99	2.97	2.96	2.97	2.95	2.95	2.85	2.86	2.93	2.74	2.77	2.75	2.65
2090	3	2.99	2.97	2.99	2.98	2.95	2.9	2.9	2.89	2.9	2.81	2.85	2.71	2.72	2.73	2.59	2.64	2.58	2.98	2.98	2.98	2.94	2.97	2.92	2.87	2.85	2.86	2.76	2.76	2.76	2.71	2.65	2.66	2.54	2.53	2.53	2.99	2.97	2.96	2.97	2.95	2.95	2.85	2.86	2.92	2.74	2.77	2.75	2.65
2100	3	2.99	2.97	2.99	2.98	2.95	2.9	2.89	2.89	2.9	2.81	2.85	2.71	2.72	2.73	2.59	2.64	2.58	2.98	2.98	2.98	2.94	2.97	2.92	2.87	2.85	2.86	2.76	2.76	2.76	2.71	2.65	2.66	2.54	2.53	2.53	2.99	2.97	2.96	2.97	2.95	2.95	2.85	2.86	2.92	2.74	2.76	2.75	2.65
2110	3	2.99	2.97	2.99	2.98	2.95	2.9	2.89	2.89	2.9	2.81	2.85	2.71	2.72	2.73	2.59	2.64	2.58	2.98	2.98	2.98	2.94	2.97	2.92	2.87	2.85	2.86	2.76	2.76	2.76	2.71	2.65	2.66	2.54	2.53	2.53	2.99	2.97	2.96	2.96	2.95	2.94	2.85	2.86	2.92	2.74	2.76	2.75	2.65
2120	3	2.99	2.97	2.99	2.98	2.95	2.9	2.89	2.89	2.9	2.81	2.85	2.71	2.72	2.73	2.59	2.63	2.57	2.98	2.98	2.98	2.94	2.97	2.92	2.87	2.85	2.86	2.76	2.76	2.76	2.71	2.65	2.66	2.54	2.53	2.52	2.99	2.97	2.96	2.96	2.95	2.94	2.85	2.86	2.92	2.74	2.76	2.75	2.65
2130	3	2.99	2.97	2.99	2.98	2.95	2.9	2.89	2.88	2.9	2.81	2.85	2.71	2.72	2.73	2.59	2.63	2.57	2.98	2.98	2.98	2.94	2.97	2.92	2.87	2.85	2.86	2.76	2.76	2.76	2.71	2.65	2.66	2.54	2.53	2.52	2.99	2.97	2.96	2.96	2.95	2.94	2.85	2.86	2.92	2.74	2.76	2.75	2.65
2140	3	2.99	2.97	2.99	2.98	2.95	2.9	2.89	2.88	2.9	2.81	2.85	2.71	2.71	2.73	2.59	2.63	2.57	2.98	2.98	2.98	2.94	2.97	2.92	2.87	2.85	2.86	2.76	2.76	2.76	2.71	2.65	2.66	2.54	2.53	2.52	2.99	2.97	2.96	2.96	2.95	2.94	2.85	2.86	2.92	2.74	2.76	2.75	2.65
2151	3	2.99	2.97	2.99	2.98	2.95	2.9	2.89	2.88	2.9	2.8	2.85	2.71	2.71	2.73	2.58	2.63	2.57	2.98	2.98	2.98	2.94	2.97	2.92	2.87	2.85	2.85	2.75	2.76	2.76	2.71	2.65	2.66	2.54	2.53	2.52	2.99	2.97	2.96	2.96	2.95	2.94	2.85	2.86	2.92	2.74	2.76	2.75	2.65
2161	3	2.99	2.97	2.99	2.98	2.95	2.9	2.89	2.88	2.9	2.8	2.85	2.71	2.71	2.73	2.58	2.63	2.57	2.98	2.98	2.98	2.94	2.97	2.92	2.87	2.85	2.85	2.75	2.76	2.75	2.71	2.65	2.66	2.54	2.53	2.52	2.99	2.97	2.96	2.96	2.95	2.94	2.85	2.86	2.92	2.74	2.76	2.75	2.64
2171	3	2.99	2.97	2.99	2.98	2.95	2.9	2.89	2.88	2.9	2.8	2.84	2.71	2.71	2.73	2.58	2.63	2.57	2.98	2.98	2.98	2.94	2.97	2.92	2.86	2.85	2.85	2.75	2.76	2.75	2.71	2.65	2.66	2.54	2.52	2.52	2.99	2.97	2.96	2.96	2.95	2.94	2.85	2.86	2.92	2.74	2.76	2.74	2.64
2181	3	2.99	2.97	2.99	2.98	2.95	2.9	2.89	2.88	2.9	2.8	2.84	2.71	2.71	2.73	2.58	2.63	2.57	2.98	2.98	2.98	2.94	2.97	2.92	2.86	2.85	2.85	2.75	2.76	2.75	2.71	2.65	2.66	2.54	2.52	2.52	2.99	2.97	2.96	2.96	2.95	2.94	2.85	2.86	2.92	2.74	2.76	2.74	2.64
2191	3	2.99	2.97	2.99	2.98	2.95	2.89	2.89	2.88	2.89	2.8	2.84	2.71	2.71	2.73	2.58	2.63	2.57	2.98	2.98	2.98	2.94	2.97	2.92	2.86	2.85	2.85	2.75	2.76	2.75	2.7	2.64	2.66	2.54	2.52	2.52	2.99	2.97	2.96	2.96	2.95	2.94	2.85	2.85	2.92	2.74	2.76	2.74	2.64
2201	3	2.99	2.97	2.99	2.98	2.95	2.89	2.89	2.88	2.89	2.8	2.84	2.71	2.71	2.73	2.58	2.63	2.57	2.98	2.98	2.98	2.94	2.97	2.92	2.86	2.85	2.85	2.75	2.76	2.75	2.7	2.64	2.66	2.54	2.52	2.52	2.99	2.97	2.96	2.96	2.95	2.94	2.85	2.85	2.92	2.73	2.76	2.74	2.64
2211	3	2.98	2.96	2.99	2.98	2.95	2.89	2.89	2.88	2.89	2.8	2.84	2.7	2.71	2.73	2.58	2.63	2.56	2.98	2.98	2.98	2.94	2.97	2.92	2.86	2.85	2.85	2.75	2.76	2.75	2.7	2.64	2.65	2.53	2.52	2.52	2.99	2.97	2.96	2.96	2.95	2.94	2.84	2.85	2.91	2.73	2.76	2.74	2.64
2222	3	2.98	2.96	2.98	2.98	2.95	2.89	2.89	2.88	2.89	2.8	2.84	2.7	2.71	2.73	2.58	2.63	2.56	2.98	2.98	2.98	2.94	2.97	2.92	2.86	2.85	2.85	2.75	2.76	2.75	2.7	2.64	2.65	2.53	2.52	2.52	2.98	2.97	2.96	2.96	2.95	2.94	2.84	2.85	2.91	2.73	2.76	2.74	2.64
2232	3	2.98	2.96	2.98	2.97	2.94	2.89	2.88	2.88	2.89	2.8	2.84	2.7	2.71	2.72	2.58	2.62	2.56	2.98	2.98	2.98	2.94	2.97	2.92	2.86	2.84	2.85	2.75	2.75	2.75	2.7	2.64	2.65	2.53	2.52	2.52	2.99	2.97	2.96	2.96	2.95	2.94	2.84	2.85	2.91	2.73	2.76	2.74	2.64
2242	3	2.98	2.96	2.98	2.97	2.94	2.89	2.88	2.88	2.89	2.8	2.84	2.7	2.71	2.72	2.58	2.62	2.56	2.98	2.98	2.98	2.94	2.97	2.92	2.86	2.84	2.85	2.75	2.75	2.75	2.7	2.64	2.65	2.53	2.52	2.51	2.99	2.97	2.96	2.96	2.95	2.94	2.84	2.85	2.91	2.73	2.75	2.74	2.64
2252	3	2.98	2.96	2.98	2.97	2.94	2.89	2.88	2.88	2.89	2.8	2.84	2.7	2.71	2.72	2.58	2.62	2.56	2.98	2.98	2.98	2.94	2.97	2.92	2.86	2.84	2.85	2.75	2.75	2.75	2.7	2.64	2.65	2.53	2.52	2.51	2.98	2.97	2.96	2.96	2.95	2.94	2.84	2.85	2.91	2.73	2.75	2.74	2.64
2262	3	2.98	2.96	2.98	2.97	2.94	2.89	2.88	2.88	2.89	2.8	2.84	2.7	2.71	2.72	2.58	2.62	2.56	2.98	2.98	2.98	2.93	2.97	2.92	2.86	2.84	2.85	2.75	2.75	2.75	2.7	2.64	2.65	2.53	2.52	2.51	2.98	2.97	2.96	2.96	2.95	2.94	2.84	2.85	2.91	2.73	2.75	2.74	2.64
2272	3	2.98	2.96	2.98	2.97	2.94	2.89	2.88	2.88	2.89	2.8	2.84	2.7	2.71	2.72	2.57	2.62	2.56	2.98	2.98	2.98	2.93	2.97	2.92	2.86	2.84	2.85	2.75	2.75	2.75	2.7	2.64	2.65	2.53	2.52	2.51	2.98	2.97	2.96	2.96	2.95	2.94	2.84	2.85	2.91	2.73	2.75	2.74	2.64
2282	3	2.98	2.96	2.98	2.97	2.94	2.89	2.88	2.88	2.89	2.8	2.84	2.7	2.7	2.72	2.57	2.62	2.56	2.98	2.98	2.98	2.93	2.97	2.92	2.86	2.84	2.85	2.75	2.75	2.75	2.7	2.64	2.65	2.53	2.52	2.51	2.98	2.97	2.96	2.96	2.95	2.94	2.84	2.85	2.91	2.73	2.75	2.74	2.64
2293	3	2.98	2.96	2.98	2.97	2.94	2.89	2.88	2.87	2.89	2.8	2.83	2.7	2.7	2.72	2.57	2.62	2.56	2.98	2.98	2.98	2.93	2.97	2.92	2.86	2.84	2.85	2.75	2.75	2.75	2.7	2.64	2.65	2.53	2.51	2.51	2.98	2.97	2.96	2.96	2.95	2.94	2.84	2.85	2.91	2.73	2.75	2.74	2.63
2303	3	2.98	2.96	2.98	2.97	2.94	2.89	2.88	2.87	2.89	2.79	2.83	2.7	2.7	2.72	2.57	2.62	2.56	2.98	2.98	2.98	2.93	2.97	2.92	2.86	2.84	2.85	2.74	2.75	2.75	2.69	2.64	2.65	2.53	2.51	2.51	2.98	2.97	2.96	2.96	2.95	2.94	2.84	2.85	2.91	2.73	2.75	2.74	2.63
2313	3	2.98	2.96	2.98	2.97	2.94	2.89	2.88	2.87	2.89	2.79	2.83	2.7	2.7	2.72	2.57	2.62	2.55	2.98	2.98	2.98	2.93	2.97	2.92	2.86	2.84	2.84	2.74	2.75	2.74	2.69	2.64	2.65	2.53	2.51	2.51	2.98	2.97	2.96	2.96	2.95	2.94	2.84	2.85	2.91	2.73	2.75	2.74	2.63
2323	3	2.98	2.96	2.98	2.97	2.94	2.89	2.88	2.87	2.89	2.79	2.83	2.7	2.7	2.72	2.57	2.62	2.55	2.98	2.98	2.98	2.93	2.97	2.91	2.85	2.84	2.84	2.74	2.75	2.74	2.69	2.64	2.65	2.53	2.51	2.51	2.98	2.97	2.96	2.96	2.95	2.94	2.84	2.85	2.91	2.73	2.75	2.74	2.63
2333	3	2.98	2.96	2.98	2.97	2.94	2.89	2.88	2.87	2.89	2.79	2.83	2.69	2.7	2.72	2.57	2.62	2.55	2.98	2.97	2.98	2.93	2.97	2.91	2.85	2.84	2.84	2.74	2.75	2.74	2.69	2.64	2.65	2.52	2.51	2.51	2.98	2.97	2.96	2.96	2.95	2.94	2.84	2.85	2.91	2.73	2.75	2.73	2.63
2343	3	2.98	2.96	2.98	2.97	2.94	2.89	2.88	2.87	2.89	2.79	2.83	2.69	2.7	2.72	2.57	2.62	2.55	2.98	2.98	2.98	2.93	2.97	2.91	2.85	2.84	2.84	2.74	2.75	2.74	2.69	2.63	2.65	2.52	2.51	2.51	2.98	2.97	2.96	2.96	2.95	2.94	2.84	2.84	2.91	2.73	2.75	2.73	2.63
2353	3	2.98	2.96	2.98	2.97	2.94	2.88	2.88	2.87	2.88	2.79	2.83	2.69	2.7	2.72	2.57	2.62	2.55	2.98	2.98	2.98	2.93	2.96	2.91	2.85	2.84	2.84	2.74	2.75	2.74	2.69	2.63	2.65	2.52	2.51	2.51	2.98	2.97	2.96	2.96	2.95	2.94	2.84	2.84	2.9	2.73	2.75	2.73	2.63
2364	3	2.98	2.96	2.98	2.97	2.94	2.88	2.88	2.87	2.88	2.79	2.83	2.69	2.7	2.72	2.57	2.61	2.55	2.98	2.98	2.98	2.93	2.96	2.91	2.85	2.84	2.84	2.74	2.75	2.74	2.69	2.63	2.65	2.52	2.51	2.51	2.98	2.97	2.96	2.96	2.95	2.94	2.83	2.84	2.9	2.72	2.75	2.73	2.63
2374	2.99	2.98	2.96	2.98	2.97	2.94	2.88	2.88	2.87	2.88	2.79	2.83	2.69	2.7	2.72	2.57	2.61	2.55	2.98	2.98	2.98	2.93	2.96	2.91	2.85	2.84	2.84	2.74	2.75	2.74	2.69	2.63	2.65	2.52	2.51	2.5	2.98	2.97	2.96	2.96	2.95	2.94	2.83	2.84	2.9	2.72	2.75	2.73	2.63
2384	2.99	2.98	2.96	2.98	2.97	2.94	2.88	2.87	2.87	2.88	2.79	2.83	2.69	2.7	2.72	2.57	2.61	2.55	2.98	2.97	2.98	2.93	2.96	2.91	2.85	2.84	2.84	2.74	2.75	2.74	2.69	2.63	2.65	2.52	2.51	2.5	2.98	2.97	2.96	2.96	2.95	2.94	2.83	2.84	2.9	2.72	2.75	2.73	2.63
2394	2.99	2.98	2.96	2.98	2.97	2.94	2.88	2.87	2.87	2.88	2.79	2.83	2.69	2.7	2.71	2.56	2.61	2.55	2.98	2.97	2.98	2.93	2.96	2.91	2.85	2.83	2.84	2.74	2.75	2.74	2.69	2.63	2.64	2.52	2.51	2.5	2.98	2.97	2.96	2.96	2.95	2.94	2.83	2.84	2.9	2.72	2.75	2.73	2.63
2404	2.99	2.98	2.96	2.98	2.97	2.94	2.88	2.87	2.87	2.88	2.79	2.82	2.69	2.7	2.71	2.56	2.61	2.55	2.98	2.97	2.97	2.93	2.96	2.91	2.85	2.83	2.84	2.74	2.75	2.74	2.69	2.63	2.64	2.52	2.51	2.5	2.98	2.97	2.96	2.96	2.95	2.94	2.83	2.84	2.9	2.72	2.74	2.73	2.63
2414	2.99	2.98	2.96	2.98	2.97	2.94	2.88	2.87	2.87	2.88	2.79	2.82	2.69	2.7	2.71	2.56	2.61	2.54	2.98	2.97	2.97	2.93	2.96	2.91	2.85	2.83	2.84	2.74	2.74	2.74	2.69	2.63	2.64	2.52	2.51	2.5	2.98	2.97	2.96	2.96	2.95	2.94	2.83	2.84	2.9	2.72	2.74	2.73	2.63
2424	2.99	2.98	2.96	2.98	2.97	2.94	2.88	2.87	2.87	2.88	2.79	2.82	2.69	2.7	2.71	2.56	2.61	2.54	2.98	2.97	2.97	2.93	2.96	2.91	2.85	2.83	2.84	2.74	2.74	2.74	2.68	2.63	2.64	2.52	2.5	2.5	2.98	2.97	2.96	2.96	2.94	2.93	2.83	2.84	2.9	2.72	2.74	2.73	2.63
2435	2.99	2.98	2.96	2.98	2.97	2.93	2.88	2.87	2.87	2.88	2.79	2.82	2.69	2.7	2.71	2.56	2.61	2.54	2.98	2.97	2.97	2.93	2.96	2.91	2.85	2.83	2.84	2.74	2.74	2.74	2.68	2.63	2.64	2.52	2.5	2.5	2.98	2.97	2.96	2.96	2.94	2.93	2.83	2.84	2.9	2.72	2.74	2.73	2.63
2445	2.99	2.98	2.96	2.98	2.97	2.93	2.88	2.87	2.87	2.88	2.79	2.82	2.69	2.69	2.71	2.56	2.61	2.54	2.98	2.97	2.97	2.93	2.96	2.91	2.85	2.83	2.84	2.74	2.74	2.74	2.68	2.63	2.64	2.52	2.5	2.5	2.98	2.97	2.96	2.96	2.94	2.93	2.83	2.84	2.9	2.72	2.74	2.73	2.62
2455	2.99	2.98	2.96	2.98	2.97	2.93	2.88	2.87	2.86	2.88	2.79	2.82	2.69	2.69	2.71	2.56	2.61	2.54	2.97	2.97	2.97	2.93	2.96	2.91	2.85	2.83	2.84	2.74	2.74	2.74	2.68	2.63	2.64	2.52	2.5	2.5	2.98	2.97	2.96	2.96	2.94	2.93	2.83	2.84	2.9	2.72	2.74	2.73	2.62
2465	2.99	2.98	2.96	2.98	2.97	2.93	2.88	2.87	2.86	2.88	2.78	2.82	2.69	2.69	2.71	2.56	2.61	2.54	2.98	2.97	2.97	2.93	2.96	2.91	2.85	2.83	2.84	2.74	2.74	2.74	2.68	2.63	2.64	2.52	2.5	2.5	2.98	2.97	2.96	2.96	2.94	2.93	2.83	2.84	2.9	2.72	2.74	2.73	2.62
2475	2.99	2.98	2.96	2.98	2.97	2.93	2.88	2.87	2.86	2.88	2.78	2.82	2.69	2.69	2.71	2.56	2.61	2.54	2.98	2.97	2.97	2.93	2.96	2.91	2.85	2.83	2.84	2.74	2.74	2.74	2.68	2.63	2.64	2.52	2.5	2.5	2.98	2.97	2.96	2.96	2.94	2.93	2.83	2.84	2.9	2.72	2.74	2.73	2.62
2485	2.99	2.98	2.96	2.98	2.97	2.93	2.88	2.87	2.86	2.88	2.78	2.82	2.69	2.69	2.71	2.56	2.61	2.54	2.98	2.97	2.97	2.93	2.96	2.91	2.84	2.83	2.84	2.74	2.74	2.74	2.68	2.63	2.64	2.51	2.5	2.5	2.98	2.97	2.96	2.96	2.94	2.93	2.83	2.84	2.89	2.72	2.74	2.73	2.62
2496	2.99	2.98	2.96	2.98	2.97	2.93	2.88	2.87	2.86	2.88	2.78	2.82	2.68	2.69	2.71	2.56	2.61	2.54	2.98	2.97	2.97	2.93	2.96	2.91	2.84	2.83	2.83	2.73	2.74	2.73	2.68	2.63	2.64	2.51	2.5	2.5	2.98	2.97	2.96	2.95	2.94	2.93	2.83	2.84	2.89	2.72	2.74	2.73	2.62
2506	2.99	2.98	2.96	2.98	2.97	2.93	2.88	2.87	2.86	2.88	2.78	2.82	2.68	2.69	2.71	2.56	2.6	2.54	2.98	2.97	2.97	2.93	2.96	2.91	2.84	2.83	2.83	2.73	2.74	2.73	2.68	2.62	2.64	2.51	2.5	2.5	2.98	2.97	2.96	2.95	2.94	2.93	2.83	2.84	2.89	2.72	2.74	2.73	2.62
2516	2.99	2.98	2.96	2.98	2.97	2.93	2.87	2.87	2.86	2.87	2.78	2.82	2.68	2.69	2.71	2.56	2.6	2.53	2.98	2.97	2.97	2.93	2.96	2.91	2.84	2.83	2.83	2.73	2.74	2.73	2.68	2.62	2.64	2.51	2.5	2.5	2.98	2.97	2.96	2.95	2.94	2.93	2.83	2.84	2.89	2.71	2.74	2.72	2.62
2526	2.99	2.98	2.96	2.98	2.97	2.93	2.87	2.87	2.86	2.87	2.78	2.82	2.68	2.69	2.71	2.56	2.6	2.53	2.97	2.97	2.97	2.93	2.96	2.91	2.84	2.83	2.83	2.73	2.74	2.73	2.68	2.62	2.64	2.51	2.5	2.49	2.98	2.97	2.96	2.95	2.94	2.93	2.83	2.84	2.89	2.71	2.74	2.72	2.62
2536	2.99	2.98	2.96	2.98	2.96	2.93	2.87	2.86	2.86	2.87	2.78	2.81	2.68	2.69	2.71	2.55	2.6	2.53	2.97	2.97	2.97	2.93	2.96	2.91	2.84	2.83	2.83	2.73	2.74	2.73	2.68	2.62	2.64	2.51	2.5	2.49	2.98	2.97	2.96	2.95	2.94	2.93	2.82	2.83	2.89	2.71	2.74	2.72	2.62
2546	2.99	2.98	2.96	2.98	2.96	2.93	2.87	2.86	2.86	2.87	2.78	2.81	2.68	2.69	2.71	2.55	2.6	2.53	2.97	2.97	2.97	2.93	2.96	2.91	2.84	2.83	2.83	2.73	2.74	2.73	2.68	2.62	2.64	2.51	2.5	2.49	2.98	2.97	2.96	2.95	2.94	2.93	2.82	2.83	2.89	2.71	2.74	2.72	2.62
2556	2.99	2.98	2.96	2.97	2.96	2.93	2.87	2.86	2.86	2.87	2.78	2.81	2.68	2.69	2.71	2.55	2.6	2.53	2.97	2.97	2.97	2.93	2.96	2.91	2.84	2.83	2.83	2.73	2.74	2.73	2.68	2.62	2.64	2.51	2.5	2.49	2.98	2.97	2.96	2.95	2.94	2.93	2.82	2.83	2.89	2.71	2.74	2.72	2.62
2567	2.99	2.98	2.96	2.97	2.96	2.93	2.87	2.86	2.86	2.87	2.78	2.81	2.68	2.69	2.71	2.55	2.6	2.53	2.97	2.97	2.97	2.93	2.96	2.91	2.84	2.83	2.83	2.73	2.74	2.73	2.67	2.62	2.64	2.51	2.5	2.49	2.98	2.97	2.96	2.95	2.94	2.93	2.82	2.83	2.89	2.71	2.74	2.72	2.62
2577	2.99	2.98	2.96	2.97	2.96	2.93	2.87	2.86	2.86	2.87	2.78	2.81	2.68	2.69	2.71	2.55	2.6	2.53	2.97	2.97	2.97	2.92	2.96	2.91	2.84	2.83	2.83	2.73	2.74	2.73	2.67	2.62	2.64	2.51	2.49	2.49	2.98	2.97	2.96	2.95	2.94	2.93	2.82	2.83	2.89	2.71	2.74	2.72	2.62
2587	2.99	2.98	2.96	2.97	2.96	2.93	2.87	2.86	2.86	2.87	2.78	2.81	2.68	2.69	2.7	2.55	2.6	2.53	2.97	2.97	2.97	2.92	2.96	2.91	2.84	2.82	2.83	2.73	2.74	2.73	2.67	2.62	2.64	2.51	2.49	2.49	2.98	2.97	2.96	2.95	2.94	2.93	2.82	2.83	2.89	2.71	2.74	2.72	2.62
2597	2.99	2.98	2.96	2.97	2.96	2.93	2.87	2.86	2.86	2.87	2.78	2.81	2.68	2.69	2.7	2.55	2.6	2.53	2.97	2.97	2.97	2.92	2.96	2.91	2.84	2.82	2.83	2.73	2.74	2.73	2.67	2.62	2.63	2.51	2.49	2.49	2.98	2.97	2.96	2.95	2.94	2.93	2.82	2.83	2.89	2.71	2.74	2.72	2.62
2607	2.99	2.98	2.96	2.97	2.96	2.93	2.87	2.86	2.86	2.87	2.78	2.81	2.68	2.68	2.7	2.55	2.6	2.53	2.97	2.97	2.97	2.92	2.95	2.91	2.84	2.82	2.83	2.73	2.73	2.73	2.67	2.62	2.63	2.51	2.49	2.49	2.98	2.97	2.96	2.95	2.94	2.93	2.82	2.83	2.89	2.71	2.73	2.72	2.61
2617	2.99	2.98	2.96	2.97	2.96	2.93	2.87	2.86	2.86	2.87	2.78	2.81	2.68	2.68	2.7	2.55	2.6	2.53	2.97	2.97	2.97	2.92	2.95	2.91	2.84	2.82	2.83	2.73	2.73	2.73	2.67	2.62	2.63	2.51	2.49	2.49	2.98	2.97	2.96	2.95	2.94	2.93	2.82	2.83	2.89	2.71	2.73	2.72	2.61
2627	2.99	2.98	2.96	2.97	2.96	2.93	2.87	2.86	2.86	2.87	2.78	2.81	2.68	2.68	2.7	2.55	2.6	2.53	2.97	2.97	2.97	2.92	2.95	2.91	2.84	2.82	2.83	2.73	2.73	2.73	2.67	2.62	2.63	2.51	2.49	2.49	2.98	2.97	2.96	2.95	2.94	2.93	2.82	2.83	2.89	2.71	2.73	2.72	2.61
2638	2.99	2.98	2.96	2.97	2.96	2.93	2.87	2.86	2.85	2.87	2.78	2.81	2.68	2.68	2.7	2.55	2.6	2.53	2.97	2.97	2.97	2.92	2.95	2.91	2.84	2.82	2.83	2.73	2.73	2.73	2.67	2.62	2.63	2.5	2.49	2.49	2.98	2.97	2.95	2.95	2.94	2.93	2.82	2.83	2.88	2.71	2.73	2.72	2.61
2648	2.99	2.98	2.96	2.97	2.96	2.92	2.87	2.86	2.85	2.87	2.78	2.81	2.68	2.68	2.7	2.55	2.6	2.52	2.97	2.97	2.97	2.92	2.95	2.9	2.84	2.82	2.83	2.73	2.73	2.73	2.67	2.62	2.63	2.5	2.49	2.49	2.98	2.97	2.95	2.95	2.94	2.93	2.82	2.83	2.88	2.71	2.73	2.72	2.61
2658	2.99	2.98	2.96	2.97	2.96	2.92	2.87	2.86	2.85	2.87	2.78	2.81	2.67	2.68	2.7	2.55	2.59	2.52	2.97	2.97	2.97	2.92	2.95	2.9	2.84	2.82	2.83	2.73	2.73	2.73	2.67	2.62	2.63	2.5	2.49	2.49	2.98	2.97	2.95	2.95	2.94	2.93	2.82	2.83	2.88	2.71	2.73	2.72	2.61
2668	2.99	2.98	2.96	2.97	2.96	2.92	2.87	2.86	2.85	2.87	2.77	2.81	2.68	2.68	2.7	2.55	2.59	2.52	2.97	2.97	2.97	2.92	2.95	2.9	2.84	2.82	2.83	2.73	2.73	2.73	2.67	2.62	2.63	2.5	2.49	2.49	2.98	2.97	2.95	2.95	2.94	2.93	2.82	2.83	2.88	2.71	2.73	2.72	2.61
2678	2.99	2.98	2.96	2.97	2.96	2.92	2.87	2.86	2.85	2.87	2.77	2.81	2.67	2.68	2.7	2.54	2.59	2.52	2.97	2.97	2.97	2.92	2.95	2.9	2.83	2.82	2.83	2.73	2.73	2.73	2.67	2.61	2.63	2.5	2.49	2.49	2.98	2.97	2.95	2.95	2.94	2.93	2.82	2.83	2.88	2.71	2.73	2.72	2.61
2688	2.99	2.98	2.96	2.97	2.96	2.92	2.87	2.86	2.85	2.87	2.77	2.81	2.67	2.68	2.7	2.54	2.59	2.52	2.97	2.97	2.97	2.92	2.95	2.9	2.83	2.82	2.83	2.73	2.73	2.73	2.67	2.61	2.63	2.5	2.49	2.48	2.98	2.97	2.95	2.95	2.94	2.93	2.82	2.83	2.88	2.71	2.73	2.72	2.61
2698	2.99	2.98	2.96	2.97	2.96	2.92	2.87	2.86	2.85	2.87	2.77	2.81	2.67	2.68	2.7	2.54	2.59	2.52	2.97	2.97	2.97	2.92	2.95	2.9	2.83	2.82	2.82	2.73	2.73	2.73	2.67	2.61	2.63	2.5	2.49	2.48	2.98	2.97	2.95	2.95	2.94	2.93	2.82	2.83	2.88	2.71	2.73	2.72	2.61
2709	2.99	2.98	2.96	2.97	2.96	2.92	2.87	2.85	2.85	2.87	2.77	2.8	2.67	2.68	2.7	2.54	2.59	2.52	2.97	2.97	2.97	2.92	2.95	2.9	2.83	2.82	2.82	2.72	2.73	2.73	2.67	2.61	2.63	2.5	2.49	2.48	2.98	2.97	2.95	2.95	2.94	2.93	2.82	2.83	2.88	2.71	2.73	2.72	2.61
2719	2.99	2.98	2.96	2.97	2.96	2.92	2.86	2.85	2.85	2.86	2.77	2.8	2.67	2.68	2.7	2.54	2.59	2.52	2.97	2.97	2.97	2.92	2.95	2.9	2.83	2.82	2.82	2.72	2.73	2.72	2.66	2.61	2.63	2.5	2.49	2.48	2.98	2.97	2.95	2.95	2.94	2.93	2.81	2.83	2.88	2.71	2.73	2.72	2.61
2729	2.99	2.98	2.96	2.97	2.96	2.92	2.86	2.85	2.85	2.86	2.77	2.8	2.67	2.68	2.7	2.54	2.59	2.52	2.97	2.97	2.97	2.92	2.95	2.9	2.83	2.82	2.82	2.72	2.73	2.72	2.66	2.61	2.63	2.5	2.49	2.48	2.98	2.97	2.95	2.95	2.94	2.93	2.81	2.82	2.88	2.7	2.73	2.72	2.61
2739	2.99	2.98	2.96	2.97	2.96	2.92	2.86	2.85	2.85	2.86	2.77	2.8	2.67	2.68	2.7	2.54	2.59	2.52	2.97	2.97	2.97	2.92	2.95	2.9	2.83	2.82	2.82	2.72	2.73	2.72	2.66	2.61	2.63	2.5	2.48	2.48	2.98	2.97	2.95	2.95	2.94	2.93	2.81	2.82	2.88	2.7	2.73	2.72	2.61
2749	2.99	2.98	2.96	2.97	2.96	2.92	2.86	2.85	2.85	2.86	2.77	2.8	2.67	2.68	2.7	2.54	2.59	2.52	2.97	2.97	2.97	2.92	2.95	2.9	2.83	2.82	2.82	2.72	2.73	2.72	2.66	2.61	2.63	2.5	2.48	2.48	2.98	2.96	2.95	2.95	2.94	2.93	2.81	2.82	2.88	2.7	2.73	2.72	2.61
2759	2.99	2.98	2.96	2.97	2.96	2.92	2.86	2.85	2.85	2.86	2.77	2.8	2.67	2.68	2.7	2.54	2.59	2.52	2.97	2.97	2.97	2.92	2.95	2.9	2.83	2.82	2.82	2.72	2.73	2.72	2.66	2.61	2.63	2.5	2.48	2.48	2.98	2.96	2.95	2.95	2.94	2.93	2.81	2.82	2.88	2.7	2.73	2.71	2.61
2769	2.99	2.98	2.96	2.97	2.96	2.92	2.86	2.85	2.85	2.86	2.77	2.8	2.67	2.68	2.7	2.54	2.59	2.51	2.97	2.97	2.97	2.92	2.95	2.9	2.83	2.82	2.82	2.72	2.73	2.72	2.66	2.61	2.63	2.5	2.48	2.48	2.98	2.96	2.95	2.95	2.94	2.93	2.81	2.82	2.88	2.7	2.73	2.71	2.61
2780	2.99	2.98	2.96	2.97	2.96	2.92	2.86	2.85	2.85	2.86	2.77	2.8	2.67	2.68	2.7	2.54	2.59	2.51	2.97	2.97	2.97	2.92	2.95	2.9	2.83	2.82	2.82	2.72	2.73	2.72	2.66	2.61	2.63	2.5	2.48	2.48	2.98	2.96	2.95	2.95	2.93	2.93	2.81	2.82	2.88	2.7	2.73	2.71	2.61
2790	2.99	2.98	2.96	2.97	2.96	2.92	2.86	2.85	2.85	2.86	2.77	2.8	2.67	2.68	2.69	2.54	2.59	2.51	2.97	2.97	2.97	2.92	2.95	2.9	2.83	2.82	2.82	2.72	2.73	2.72	2.66	2.61	2.63	2.5	2.48	2.48	2.98	2.96	2.95	2.95	2.93	2.93	2.81	2.82	2.87	2.7	2.73	2.71	2.61
2800	2.99	2.98	2.96	2.97	2.96	2.92	2.86	2.85	2.85	2.86	2.77	2.8	2.67	2.68	2.69	2.54	2.58	2.51	2.97	2.97	2.97	2.92	2.95	2.9	2.83	2.81	2.82	2.72	2.73	2.72	2.66	2.61	2.63	2.5	2.48	2.48	2.98	2.96	2.95	2.95	2.93	2.92	2.81	2.82	2.87	2.7	2.73	2.71	2.6
2810	2.99	2.98	2.96	2.97	2.96	2.92	2.86	2.85	2.85	2.86	2.77	2.8	2.67	2.67	2.69	2.54	2.58	2.51	2.97	2.97	2.97	2.92	2.95	2.9	2.83	2.81	2.82	2.72	2.73	2.72	2.66	2.61	2.63	2.49	2.48	2.48	2.98	2.96	2.95	2.95	2.93	2.92	2.81	2.82	2.87	2.7	2.73	2.71	2.6
2820	2.99	2.98	2.96	2.97	2.96	2.92	2.86	2.85	2.85	2.86	2.77	2.8	2.67	2.67	2.69	2.54	2.58	2.51	2.97	2.97	2.97	2.92	2.95	2.9	2.83	2.81	2.82	2.72	2.73	2.72	2.66	2.61	2.63	2.49	2.48	2.48	2.98	2.96	2.95	2.95	2.93	2.92	2.81	2.82	2.87	2.7	2.73	2.71	2.6
2830	2.99	2.98	2.96	2.97	2.96	2.92	2.86	2.85	2.85	2.86	2.77	2.8	2.67	2.67	2.69	2.54	2.58	2.51	2.97	2.97	2.97	2.92	2.95	2.9	2.83	2.81	2.82	2.72	2.73	2.72	2.66	2.61	2.62	2.49	2.48	2.48	2.98	2.96	2.95	2.95	2.93	2.92	2.81	2.82	2.87	2.7	2.72	2.71	2.6
2840	2.99	2.98	2.96	2.97	2.95	2.92	2.86	2.85	2.84	2.86	2.77	2.8	2.67	2.67	2.69	2.53	2.58	2.51	2.97	2.97	2.97	2.92	2.95	2.9	2.83	2.81	2.82	2.72	2.72	2.72	2.66	2.61	2.62	2.49	2.48	2.48	2.98	2.96	2.95	2.95	2.93	2.92	2.81	2.82	2.87	2.7	2.72	2.71	2.6
2851	2.99	2.97	2.96	2.97	2.95	2.92	2.86	2.85	2.84	2.86	2.77	2.8	2.67	2.67	2.69	2.53	2.58	2.51	2.97	2.97	2.97	2.92	2.95	2.9	2.83	2.81	2.82	2.72	2.72	2.72	2.66	2.61	2.62	2.49	2.48	2.47	2.98	2.96	2.95	2.94	2.93	2.92	2.81	2.82	2.87	2.7	2.72	2.71	2.6
2861	2.99	2.97	2.96	2.97	2.95	2.92	2.86	2.85	2.84	2.86	2.77	2.8	2.67	2.67	2.69	2.53	2.58	2.51	2.97	2.97	2.97	2.92	2.94	2.9	2.83	2.81	2.82	2.72	2.72	2.72	2.66	2.61	2.62	2.49	2.48	2.47	2.98	2.96	2.95	2.94	2.93	2.92	2.81	2.82	2.87	2.7	2.72	2.71	2.6
2871	2.99	2.97	2.96	2.96	2.95	2.92	2.86	2.85	2.84	2.86	2.77	2.79	2.67	2.67	2.69	2.53	2.58	2.51	2.97	2.97	2.97	2.92	2.94	2.9	2.83	2.81	2.82	2.72	2.72	2.72	2.65	2.61	2.62	2.49	2.48	2.47	2.98	2.96	2.95	2.94	2.93	2.92	2.81	2.82	2.87	2.7	2.72	2.71	2.6
2881	2.99	2.97	2.96	2.96	2.95	2.91	2.86	2.85	2.84	2.86	2.77	2.79	2.66	2.67	2.69	2.53	2.58	2.51	2.97	2.97	2.97	2.92	2.94	2.9	2.83	2.81	2.82	2.72	2.72	2.72	2.65	2.61	2.62	2.49	2.48	2.47	2.98	2.96	2.95	2.94	2.93	2.92	2.81	2.82	2.87	2.7	2.72	2.71	2.6
2891	2.99	2.97	2.96	2.96	2.95	2.91	2.86	2.85	2.84	2.86	2.77	2.79	2.66	2.67	2.69	2.53	2.58	2.51	2.97	2.97	2.97	2.92	2.94	2.9	2.82	2.81	2.82	2.72	2.72	2.72	2.65	2.61	2.62	2.49	2.48	2.47	2.98	2.96	2.95	2.94	2.93	2.92	2.81	2.82	2.87	2.7	2.72	2.71	2.6
2901	2.99	2.97	2.96	2.96	2.95	2.91	2.86	2.85	2.84	2.86	2.77	2.79	2.66	2.67	2.69	2.53	2.58	2.51	2.97	2.97	2.97	2.92	2.94	2.9	2.82	2.81	2.82	2.72	2.72	2.72	2.65	2.6	2.62	2.49	2.48	2.47	2.98	2.96	2.95	2.94	2.93	2.92	2.81	2.82	2.87	2.7	2.72	2.71	2.6
2911	2.99	2.97	2.96	2.96	2.95	2.91	2.86	2.84	2.84	2.86	2.76	2.79	2.66	2.67	2.69	2.53	2.58	2.5	2.97	2.97	2.97	2.91	2.94	2.9	2.82	2.81	2.82	2.72	2.72	2.72	2.65	2.6	2.62	2.49	2.48	2.47	2.98	2.96	2.95	2.94	2.93	2.92	2.81	2.82	2.87	2.7	2.72	2.71	2.6
2922	2.99	2.97	2.96	2.96	2.95	2.91	2.85	2.84	2.84	2.85	2.76	2.79	2.66	2.67	2.69	2.53	2.58	2.5	2.97	2.97	2.97	2.91	2.94	2.9	2.82	2.81	2.82	2.72	2.72	2.72	2.65	2.6	2.62	2.49	2.48	2.47	2.98	2.96	2.95	2.94	2.93	2.92	2.81	2.82	2.87	2.7	2.72	2.71	2.6
2932	2.99	2.97	2.96	2.96	2.95	2.91	2.85	2.84	2.84	2.85	2.76	2.79	2.66	2.67	2.69	2.53	2.58	2.5	2.97	2.97	2.97	2.92	2.94	2.9	2.82	2.81	2.82	2.72	2.72	2.72	2.65	2.6	2.62	2.49	2.47	2.47	2.98	2.96	2.95	2.94	2.93	2.92	2.81	2.82	2.87	2.7	2.72	2.71	2.6
2942	2.99	2.97	2.96	2.96	2.95	2.91	2.85	2.84	2.84	2.85	2.76	2.79	2.66	2.67	2.69	2.53	2.58	2.5	2.97	2.97	2.97	2.91	2.94	2.9	2.82	2.81	2.82	2.72	2.72	2.72	2.65	2.6	2.62	2.49	2.47	2.47	2.98	2.96	2.95	2.94	2.93	2.92	2.81	2.82	2.87	2.7	2.72	2.71	2.6
2952	2.99	2.97	2.96	2.96	2.95	2.91	2.85	2.84	2.84	2.85	2.76	2.79	2.66	2.67	2.69	2.53	2.58	2.5	2.97	2.97	2.97	2.91	2.94	2.9	2.82	2.81	2.81	2.72	2.72	2.72	2.65	2.6	2.62	2.49	2.47	2.47	2.98	2.96	2.95	2.94	2.93	2.92	2.81	2.82	2.87	2.7	2.72	2.71	2.6
2962	2.99	2.97	2.96	2.96	2.95	2.91	2.85	2.84	2.84	2.85	2.76	2.79	2.66	2.67	2.69	2.53	2.57	2.5	2.97	2.97	2.97	2.91	2.94	2.9	2.82	2.81	2.81	2.72	2.72	2.72	2.65	2.6	2.62	2.49	2.47	2.47	2.98	2.96	2.95	2.94	2.93	2.92	2.8	2.82	2.86	2.7	2.72	2.71	2.6
2972	2.99	2.97	2.96	2.96	2.95	2.91	2.85	2.84	2.84	2.85	2.76	2.79	2.66	2.67	2.69	2.53	2.57	2.5	2.97	2.97	2.97	2.91	2.94	2.9	2.82	2.81	2.81	2.72	2.72	2.72	2.65	2.6	2.62	2.49	2.47	2.47	2.98	2.96	2.95	2.94	2.93	2.92	2.8	2.81	2.86	2.69	2.72	2.71	2.6
2982	2.99	2.97	2.95	2.96	2.95	2.91	2.85	2.84	2.84	2.85	2.76	2.79	2.66	2.67	2.69	2.53	2.57	2.5	2.97	2.97	2.97	2.91	2.94	2.9	2.82	2.81	2.81	2.71	2.72	2.71	2.65	2.6	2.62	2.49	2.47	2.47	2.98	2.96	2.95	2.94	2.93	2.92	2.8	2.81	2.86	2.69	2.72	2.71	2.6
2993	2.99	2.97	2.95	2.96	2.95	2.91	2.85	2.84	2.84	2.85	2.76	2.79	2.66	2.67	2.69	2.53	2.57	2.5	2.97	2.97	2.97	2.91	2.94	2.9	2.82	2.81	2.81	2.71	2.72	2.71	2.65	2.6	2.62	2.48	2.47	2.47	2.98	2.96	2.95	2.94	2.93	2.92	2.8	2.81	2.86	2.69	2.72	2.71	2.6
3003	2.99	2.97	2.95	2.96	2.95	2.91	2.85	2.84	2.84	2.85	2.76	2.79	2.66	2.67	2.69	2.53	2.57	2.5	2.97	2.97	2.97	2.91	2.94	2.9	2.82	2.81	2.81	2.71	2.72	2.71	2.65	2.6	2.62	2.48	2.47	2.47	2.98	2.96	2.95	2.94	2.93	2.92	2.8	2.81	2.86	2.69	2.72	2.7	2.59
3013	2.99	2.97	2.95	2.96	2.95	2.91	2.85	2.84	2.84	2.85	2.76	2.79	2.66	2.67	2.69	2.52	2.57	2.5	2.97	2.97	2.97	2.91	2.94	2.89	2.82	2.81	2.81	2.71	2.72	2.71	2.65	2.6	2.62	2.48	2.47	2.47	2.98	2.96	2.95	2.94	2.93	2.92	2.8	2.81	2.86	2.69	2.72	2.7	2.59
3023	2.99	2.97	2.95	2.96	2.95	2.91	2.85	2.84	2.84	2.85	2.76	2.79	2.66	2.67	2.68	2.52	2.57	2.5	2.97	2.97	2.97	2.91	2.94	2.89	2.82	2.81	2.81	2.71	2.72	2.71	2.65	2.6	2.62	2.48	2.47	2.47	2.98	2.96	2.95	2.94	2.93	2.92	2.8	2.81	2.86	2.69	2.72	2.7	2.59
3033	2.99	2.97	2.95	2.96	2.95	2.91	2.85	2.84	2.84	2.85	2.76	2.79	2.66	2.66	2.68	2.52	2.57	2.5	2.97	2.97	2.97	2.91	2.94	2.89	2.82	2.81	2.81	2.71	2.72	2.71	2.65	2.6	2.62	2.48	2.47	2.46	2.98	2.96	2.95	2.94	2.93	2.92	2.8	2.81	2.86	2.69	2.72	2.7	2.59
3043	2.99	2.97	2.95	2.96	2.95	2.91	2.85	2.84	2.84	2.85	2.76	2.79	2.66	2.66	2.68	2.52	2.57	2.5	2.97	2.97	2.97	2.91	2.94	2.89	2.82	2.81	2.81	2.71	2.72	2.71	2.64	2.6	2.62	2.48	2.47	2.46	2.98	2.96	2.95	2.94	2.93	2.92	2.8	2.81	2.86	2.69	2.72	2.7	2.59
3053	2.99	2.97	2.95	2.96	2.95	2.91	2.85	2.84	2.84	2.85	2.76	2.78	2.66	2.66	2.68	2.52	2.57	2.5	2.97	2.97	2.97	2.91	2.94	2.89	2.82	2.8	2.81	2.71	2.72	2.71	2.64	2.6	2.62	2.48	2.47	2.46	2.98	2.96	2.95	2.94	2.93	2.92	2.8	2.81	2.86	2.69	2.72	2.7	2.59
3064	2.99	2.97	2.95	2.96	2.95	2.91	2.85	2.84	2.84	2.85	2.76	2.78	2.66	2.66	2.68	2.52	2.57	2.5	2.97	2.97	2.97	2.91	2.94	2.89	2.82	2.8	2.81	2.71	2.72	2.71	2.64	2.6	2.62	2.48	2.47	2.46	2.98	2.96	2.95	2.94	2.93	2.92	2.8	2.81	2.86	2.69	2.72	2.7	2.59
3074	2.99	2.97	2.95	2.96	2.95	2.91	2.85	2.84	2.84	2.85	2.76	2.78	2.66	2.66	2.68	2.52	2.57	2.49	2.97	2.97	2.97	2.91	2.94	2.89	2.82	2.8	2.81	2.71	2.72	2.71	2.64	2.6	2.62	2.48	2.47	2.46	2.98	2.96	2.95	2.94	2.93	2.92	2.8	2.81	2.86	2.69	2.72	2.7	2.59
3084	2.99	2.97	2.95	2.96	2.95	2.91	2.85	2.84	2.83	2.85	2.76	2.78	2.66	2.66	2.68	2.52	2.57	2.49	2.97	2.97	2.97	2.91	2.94	2.89	2.82	2.8	2.81	2.71	2.72	2.71	2.64	2.6	2.62	2.48	2.47	2.46	2.98	2.96	2.95	2.94	2.93	2.92	2.8	2.81	2.86	2.69	2.72	2.7	2.59
3094	2.99	2.97	2.95	2.96	2.95	2.91	2.85	2.84	2.83	2.85	2.76	2.78	2.66	2.66	2.68	2.52	2.57	2.49	2.97	2.97	2.97	2.91	2.94	2.89	2.82	2.8	2.81	2.71	2.72	2.71	2.64	2.6	2.62	2.48	2.47	2.46	2.98	2.96	2.95	2.94	2.93	2.92	2.8	2.81	2.86	2.69	2.72	2.7	2.59
3104	2.98	2.97	2.95	2.96	2.95	2.9	2.85	2.84	2.83	2.85	2.76	2.78	2.66	2.66	2.68	2.52	2.57	2.49	2.97	2.97	2.97	2.91	2.94	2.89	2.82	2.8	2.81	2.71	2.72	2.71	2.64	2.6	2.61	2.48	2.47	2.46	2.98	2.96	2.95	2.94	2.93	2.92	2.8	2.81	2.86	2.69	2.72	2.7	2.59
3114	2.98	2.97	2.95	2.96	2.95	2.9	2.85	2.83	2.83	2.85	2.76	2.78	2.66	2.66	2.68	2.52	2.57	2.49	2.97	2.97	2.97	2.91	2.94	2.89	2.82	2.8	2.81	2.71	2.71	2.71	2.64	2.6	2.61	2.48	2.47	2.46	2.98	2.96	2.95	2.94	2.93	2.92	2.8	2.81	2.86	2.69	2.72	2.7	2.59
3124	2.98	2.97	2.95	2.96	2.95	2.9	2.85	2.83	2.83	2.85	2.76	2.78	2.66	2.66	2.68	2.52	2.56	2.49	2.97	2.97	2.97	2.91	2.94	2.89	2.82	2.8	2.81	2.71	2.72	2.71	2.64	2.6	2.61	2.48	2.46	2.46	2.98	2.96	2.95	2.94	2.93	2.92	2.8	2.81	2.86	2.69	2.71	2.7	2.59
3135	2.98	2.97	2.95	2.96	2.95	2.9	2.84	2.83	2.83	2.84	2.76	2.78	2.65	2.66	2.68	2.52	2.56	2.49	2.97	2.97	2.97	2.91	2.93	2.89	2.82	2.8	2.81	2.71	2.71	2.71	2.64	2.6	2.61	2.48	2.46	2.46	2.98	2.96	2.95	2.94	2.93	2.92	2.8	2.81	2.86	2.69	2.71	2.7	2.59
3145	2.98	2.97	2.95	2.96	2.95	2.9	2.84	2.83	2.83	2.84	2.76	2.78	2.65	2.66	2.68	2.52	2.56	2.49	2.97	2.97	2.97	2.91	2.93	2.89	2.81	2.8	2.81	2.71	2.71	2.71	2.64	2.59	2.61	2.48	2.46	2.46	2.98	2.96	2.95	2.94	2.93	2.92	2.8	2.81	2.85	2.69	2.71	2.7	2.59
3155	2.98	2.97	2.95	2.96	2.95	2.9	2.84	2.83	2.83	2.84	2.76	2.78	2.65	2.66	2.68	2.52	2.56	2.49	2.97	2.97	2.97	2.91	2.93	2.89	2.81	2.8	2.81	2.71	2.71	2.71	2.64	2.59	2.61	2.48	2.46	2.46	2.98	2.96	2.95	2.94	2.93	2.92	2.8	2.81	2.85	2.69	2.71	2.7	2.59
3165	2.98	2.97	2.95	2.96	2.95	2.9	2.84	2.83	2.83	2.84	2.76	2.78	2.65	2.66	2.68	2.52	2.56	2.49	2.97	2.97	2.97	2.91	2.93	2.89	2.81	2.8	2.81	2.71	2.71	2.71	2.64	2.59	2.61	2.48	2.46	2.46	2.98	2.96	2.95	2.94	2.93	2.92	2.8	2.81	2.85	2.69	2.71	2.7	2.59
3175	2.98	2.97	2.95	2.96	2.94	2.9	2.84	2.83	2.83	2.84	2.76	2.78	2.65	2.66	2.68	2.52	2.56	2.49	2.97	2.97	2.97	2.91	2.93	2.89	2.81	2.8	2.81	2.71	2.71	2.71	2.64	2.59	2.61	2.48	2.46	2.46	2.98	2.96	2.95	2.94	2.93	2.92	2.8	2.81	2.85	2.69	2.71	2.7	2.59
3185	2.98	2.97	2.95	2.96	2.94	2.9	2.84	2.83	2.83	2.84	2.76	2.78	2.65	2.66	2.68	2.52	2.56	2.49	2.97	2.97	2.97	2.91	2.93	2.89	2.81	2.8	2.81	2.71	2.71	2.71	2.64	2.59	2.61	2.48	2.46	2.46	2.98	2.96	2.95	2.94	2.93	2.92	2.8	2.81	2.85	2.69	2.71	2.7	2.59
3196	2.98	2.97	2.95	2.96	2.94	2.9	2.84	2.83	2.83	2.84	2.76	2.78	2.65	2.66	2.68	2.52	2.56	2.49	2.97	2.97	2.97	2.91	2.93	2.89	2.81	2.8	2.81	2.71	2.71	2.71	2.64	2.59	2.61	2.47	2.46	2.46	2.98	2.96	2.95	2.94	2.93	2.91	2.8	2.81	2.85	2.69	2.71	2.7	2.59
3206	2.98	2.97	2.95	2.96	2.94	2.9	2.84	2.83	2.83	2.84	2.76	2.78	2.65	2.66	2.68	2.52	2.56	2.49	2.97	2.97	2.97	2.91	2.93	2.89	2.81	2.8	2.81	2.71	2.71	2.71	2.64	2.59	2.61	2.47	2.46	2.46	2.98	2.96	2.95	2.94	2.92	2.91	2.8	2.81	2.85	2.69	2.71	2.7	2.59
3216	2.98	2.97	2.95	2.96	2.94	2.9	2.84	2.83	2.83	2.84	2.75	2.78	2.65	2.66	2.68	2.52	2.56	2.49	2.97	2.96	2.97	2.91	2.93	2.89	2.81	2.8	2.81	2.71	2.71	2.71	2.64	2.59	2.61	2.47	2.46	2.46	2.98	2.96	2.95	2.94	2.92	2.91	2.8	2.81	2.85	2.69	2.71	2.7	2.59
3226	2.98	2.97	2.95	2.95	2.94	2.9	2.84	2.83	2.83	2.84	2.75	2.78	2.65	2.66	2.68	2.51	2.56	2.49	2.97	2.96	2.97	2.91	2.93	2.89	2.81	2.8	2.81	2.71	2.71	2.71	2.63	2.59	2.61	2.47	2.46	2.46	2.98	2.96	2.95	2.94	2.92	2.91	2.8	2.81	2.85	2.69	2.71	2.7	2.59
3236	2.98	2.97	2.95	2.95	2.94	2.9	2.84	2.83	2.83	2.84	2.75	2.78	2.65	2.66	2.68	2.51	2.56	2.49	2.97	2.96	2.97	2.91	2.93	2.89	2.81	2.8	2.8	2.71	2.71	2.71	2.63	2.59	2.61	2.47	2.46	2.45	2.98	2.96	2.95	2.94	2.92	2.91	2.8	2.81	2.85	2.69	2.71	2.7	2.59
3246	2.98	2.97	2.95	2.95	2.94	2.9	2.84	2.83	2.83	2.84	2.75	2.78	2.65	2.66	2.68	2.51	2.56	2.48	2.97	2.96	2.97	2.91	2.93	2.89	2.81	2.8	2.81	2.71	2.71	2.71	2.63	2.59	2.61	2.47	2.46	2.45	2.98	2.96	2.95	2.94	2.92	2.91	2.79	2.8	2.85	2.69	2.71	2.7	2.58
3256	2.98	2.97	2.95	2.95	2.94	2.9	2.84	2.83	2.83	2.84	2.75	2.77	2.65	2.66	2.68	2.51	2.56	2.48	2.97	2.96	2.97	2.91	2.93	2.89	2.81	2.8	2.81	2.71	2.71	2.71	2.63	2.59	2.61	2.47	2.46	2.45	2.98	2.96	2.95	2.93	2.92	2.91	2.79	2.8	2.85	2.69	2.71	2.7	2.58
3267	2.98	2.97	2.95	2.95	2.94	2.9	2.84	2.83	2.83	2.84	2.75	2.77	2.65	2.66	2.68	2.51	2.56	2.48	2.97	2.96	2.97	2.91	2.93	2.89	2.81	2.8	2.8	2.71	2.71	2.71	2.63	2.59	2.61	2.47	2.46	2.45	2.98	2.96	2.95	2.93	2.92	2.91	2.79	2.8	2.85	2.68	2.71	2.7	2.58
3277	2.98	2.97	2.95	2.95	2.94	2.9	2.84	2.83	2.83	2.84	2.75	2.77	2.65	2.66	2.68	2.51	2.56	2.48	2.97	2.96	2.97	2.91	2.93	2.89	2.81	2.8	2.8	2.71	2.71	2.71	2.63	2.59	2.61	2.47	2.46	2.45	2.98	2.96	2.95	2.93	2.92	2.91	2.79	2.8	2.85	2.68	2.71	2.7	2.58
3287	2.98	2.97	2.95	2.95	2.94	2.9	2.84	2.83	2.83	2.84	2.75	2.77	2.65	2.66	2.68	2.51	2.56	2.48	2.97	2.96	2.97	2.91	2.93	2.89	2.81	2.8	2.8	2.71	2.71	2.71	2.63	2.59	2.61	2.47	2.46	2.45	2.98	2.96	2.95	2.93	2.92	2.91	2.79	2.8	2.85	2.68	2.71	2.7	2.58
3297	2.98	2.97	2.95	2.95	2.94	2.9	2.84	2.83	2.83	2.84	2.75	2.77	2.65	2.66	2.68	2.51	2.56	2.48	2.97	2.96	2.97	2.91	2.93	2.89	2.81	2.8	2.8	2.71	2.71	2.71	2.63	2.59	2.61	2.47	2.46	2.45	2.98	2.96	2.95	2.93	2.92	2.91	2.79	2.8	2.85	2.68	2.71	2.7	2.58
3307	2.98	2.97	2.95	2.95	2.94	2.9	2.84	2.83	2.83	2.84	2.75	2.77	2.65	2.66	2.67	2.51	2.55	2.48	2.97	2.96	2.97	2.91	2.93	2.89	2.81	2.8	2.8	2.7	2.71	2.71	2.63	2.59	2.61	2.47	2.46	2.45	2.98	2.96	2.95	2.93	2.92	2.91	2.79	2.8	2.85	2.68	2.71	2.7	2.58
3317	2.98	2.97	2.95	2.95	2.94	2.9	2.84	2.83	2.83	2.84	2.75	2.77	2.65	2.66	2.67	2.51	2.55	2.48	2.97	2.96	2.97	2.9	2.93	2.89	2.81	2.8	2.8	2.7	2.71	2.7	2.63	2.59	2.61	2.47	2.46	2.45	2.98	2.96	2.95	2.93	2.92	2.91	2.79	2.8	2.85	2.68	2.71	2.69	2.58
3327	2.98	2.97	2.95	2.95	2.94	2.9	2.84	2.83	2.83	2.84	2.75	2.77	2.65	2.65	2.67	2.51	2.55	2.48	2.97	2.96	2.97	2.9	2.93	2.89	2.81	2.8	2.8	2.7	2.71	2.7	2.63	2.59	2.61	2.47	2.46	2.45	2.98	2.96	2.95	2.93	2.92	2.91	2.79	2.8	2.85	2.68	2.71	2.69	2.58
3338	2.98	2.97	2.95	2.95	2.94	2.89	2.84	2.83	2.83	2.84	2.75	2.77	2.65	2.65	2.67	2.51	2.55	2.48	2.97	2.96	2.97	2.9	2.93	2.89	2.81	2.8	2.8	2.7	2.71	2.7	2.63	2.59	2.61	2.47	2.46	2.45	2.98	2.96	2.95	2.93	2.92	2.91	2.79	2.8	2.85	2.68	2.71	2.69	2.58
3348	2.98	2.97	2.95	2.95	2.94	2.89	2.84	2.83	2.83	2.84	2.75	2.77	2.65	2.65	2.67	2.51	2.55	2.48	2.97	2.96	2.96	2.9	2.93	2.89	2.81	2.8	2.8	2.7	2.71	2.7	2.63	2.59	2.61	2.47	2.46	2.45	2.98	2.96	2.95	2.93	2.92	2.91	2.79	2.8	2.85	2.68	2.71	2.69	2.58
3358	2.98	2.97	2.95	2.95	2.94	2.89	2.84	2.83	2.83	2.84	2.75	2.77	2.65	2.65	2.67	2.51	2.55	2.48	2.97	2.96	2.96	2.9	2.93	2.89	2.81	2.8	2.8	2.7	2.71	2.7	2.63	2.59	2.61	2.47	2.45	2.45	2.98	2.96	2.95	2.93	2.92	2.91	2.79	2.8	2.84	2.68	2.71	2.69	2.58
3368	2.98	2.97	2.95	2.95	2.94	2.89	2.84	2.83	2.82	2.84	2.75	2.77	2.65	2.65	2.67	2.51	2.55	2.48	2.97	2.96	2.96	2.9	2.93	2.89	2.81	2.79	2.8	2.7	2.71	2.7	2.63	2.59	2.61	2.47	2.45	2.45	2.98	2.96	2.95	2.93	2.92	2.91	2.79	2.8	2.84	2.68	2.71	2.69	2.58
3378	2.98	2.97	2.95	2.95	2.94	2.89	2.84	2.82	2.82	2.84	2.75	2.77	2.65	2.65	2.67	2.51	2.55	2.48	2.96	2.96	2.96	2.9	2.93	2.89	2.81	2.79	2.8	2.7	2.71	2.7	2.63	2.59	2.61	2.47	2.45	2.45	2.98	2.96	2.95	2.93	2.92	2.91	2.79	2.8	2.84	2.68	2.71	2.69	2.58
3388	2.98	2.97	2.95	2.95	2.94	2.89	2.84	2.82	2.82	2.84	2.75	2.77	2.65	2.65	2.67	2.51	2.55	2.48	2.96	2.96	2.96	2.9	2.93	2.89	2.81	2.79	2.8	2.7	2.71	2.7	2.63	2.59	2.61	2.47	2.45	2.45	2.98	2.96	2.95	2.93	2.92	2.91	2.79	2.8	2.84	2.68	2.71	2.69	2.58
3398	2.98	2.97	2.95	2.95	2.94	2.89	2.83	2.82	2.82	2.83	2.75	2.77	2.65	2.65	2.67	2.51	2.55	2.48	2.96	2.96	2.96	2.9	2.93	2.89	2.81	2.79	2.8	2.7	2.71	2.7	2.63	2.59	2.6	2.47	2.45	2.45	2.98	2.96	2.95	2.93	2.92	2.91	2.79	2.8	2.84	2.68	2.71	2.69	2.58
3409	2.98	2.97	2.95	2.95	2.94	2.89	2.83	2.82	2.82	2.83	2.75	2.77	2.65	2.65	2.67	2.51	2.55	2.48	2.96	2.96	2.96	2.9	2.93	2.89	2.81	2.79	2.8	2.7	2.71	2.7	2.63	2.58	2.61	2.47	2.45	2.45	2.98	2.96	2.94	2.93	2.92	2.91	2.79	2.8	2.84	2.68	2.71	2.69	2.58
3419	2.98	2.97	2.95	2.95	2.94	2.89	2.83	2.82	2.82	2.83	2.75	2.77	2.64	2.65	2.67	2.51	2.55	2.48	2.96	2.96	2.96	2.9	2.93	2.89	2.81	2.79	2.8	2.7	2.71	2.7	2.63	2.58	2.6	2.47	2.45	2.45	2.98	2.96	2.94	2.93	2.92	2.91	2.79	2.8	2.84	2.68	2.71	2.69	2.58
3429	2.98	2.97	2.95	2.95	2.94	2.89	2.83	2.82	2.82	2.83	2.75	2.77	2.64	2.65	2.67	2.51	2.55	2.48	2.96	2.96	2.96	2.9	2.93	2.89	2.81	2.79	2.8	2.7	2.71	2.7	2.62	2.58	2.6	2.46	2.45	2.45	2.98	2.96	2.94	2.93	2.92	2.91	2.79	2.8	2.84	2.68	2.71	2.69	2.58
3439	2.98	2.97	2.95	2.95	2.94	2.89	2.83	2.82	2.82	2.83	2.75	2.77	2.64	2.65	2.67	2.5	2.55	2.47	2.96	2.96	2.96	2.9	2.92	2.88	2.81	2.79	2.8	2.7	2.71	2.7	2.62	2.58	2.6	2.46	2.45	2.45	2.98	2.96	2.95	2.93	2.92	2.91	2.79	2.8	2.84	2.68	2.71	2.69	2.58
3449	2.98	2.97	2.95	2.95	2.94	2.89	2.83	2.82	2.82	2.83	2.75	2.77	2.64	2.65	2.67	2.5	2.55	2.47	2.96	2.96	2.96	2.9	2.92	2.88	2.81	2.79	2.8	2.7	2.71	2.7	2.62	2.58	2.6	2.46	2.45	2.45	2.98	2.96	2.94	2.93	2.92	2.91	2.79	2.8	2.84	2.68	2.71	2.69	2.58
3459	2.98	2.97	2.95	2.95	2.94	2.89	2.83	2.82	2.82	2.83	2.75	2.77	2.64	2.65	2.67	2.5	2.55	2.47	2.96	2.96	2.96	2.9	2.92	2.88	2.8	2.79	2.8	2.7	2.7	2.7	2.62	2.58	2.6	2.46	2.45	2.44	2.98	2.96	2.94	2.93	2.92	2.91	2.79	2.8	2.84	2.68	2.7	2.69	2.58
3469	2.98	2.97	2.95	2.95	2.94	2.89	2.83	2.82	2.82	2.83	2.75	2.77	2.64	2.65	2.67	2.5	2.55	2.47	2.96	2.96	2.96	2.9	2.92	2.88	2.8	2.79	2.8	2.7	2.7	2.7	2.62	2.58	2.6	2.46	2.45	2.44	2.98	2.96	2.94	2.93	2.92	2.91	2.79	2.8	2.84	2.68	2.7	2.69	2.58
3480	2.98	2.97	2.95	2.95	2.94	2.89	2.83	2.82	2.82	2.83	2.75	2.76	2.64	2.65	2.67	2.5	2.55	2.47	2.96	2.96	2.96	2.9	2.92	2.88	2.8	2.79	2.8	2.7	2.7	2.7	2.62	2.58	2.6	2.46	2.45	2.44	2.98	2.96	2.94	2.93	2.92	2.91	2.79	2.8	2.84	2.68	2.7	2.69	2.58
3490	2.98	2.97	2.95	2.95	2.94	2.89	2.83	2.82	2.82	2.83	2.75	2.76	2.64	2.65	2.67	2.5	2.54	2.47	2.96	2.96	2.96	2.9	2.92	2.88	2.8	2.79	2.8	2.7	2.7	2.7	2.62	2.58	2.6	2.46	2.45	2.44	2.98	2.96	2.94	2.93	2.92	2.91	2.79	2.8	2.84	2.68	2.7	2.69	2.57
3500	2.98	2.97	2.95	2.95	2.94	2.89	2.83	2.82	2.82	2.83	2.75	2.76	2.64	2.65	2.67	2.5	2.54	2.47	2.96	2.96	2.96	2.9	2.92	2.88	2.8	2.79	2.8	2.7	2.7	2.7	2.62	2.58	2.6	2.46	2.45	2.44	2.98	2.96	2.94	2.93	2.92	2.91	2.79	2.8	2.84	2.68	2.7	2.69	2.57
3510	2.98	2.96	2.95	2.95	2.93	2.89	2.83	2.82	2.82	2.83	2.75	2.76	2.64	2.65	2.67	2.5	2.54	2.47	2.96	2.96	2.96	2.9	2.92	2.88	2.8	2.79	2.8	2.7	2.7	2.7	2.62	2.58	2.6	2.46	2.45	2.44	2.98	2.96	2.94	2.93	2.92	2.91	2.79	2.8	2.84	2.68	2.7	2.69	2.57
3520	2.98	2.96	2.95	2.95	2.93	2.89	2.83	2.82	2.82	2.83	2.75	2.76	2.64	2.65	2.67	2.5	2.54	2.47	2.96	2.96	2.96	2.9	2.92	2.88	2.8	2.79	2.8	2.7	2.7	2.7	2.62	2.58	2.6	2.46	2.45	2.44	2.98	2.96	2.94	2.93	2.92	2.91	2.79	2.8	2.84	2.68	2.7	2.69	2.57
3530	2.98	2.96	2.95	2.95	2.93	2.89	2.83	2.82	2.82	2.83	2.75	2.76	2.64	2.65	2.67	2.5	2.54	2.47	2.96	2.96	2.96	2.9	2.92	2.88	2.8	2.79	2.8	2.7	2.7	2.7	2.62	2.58	2.6	2.46	2.45	2.44	2.98	2.96	2.94	2.93	2.92	2.91	2.79	2.8	2.84	2.68	2.7	2.69	2.57
3540	2.98	2.96	2.95	2.95	2.93	2.89	2.83	2.82	2.82	2.83	2.75	2.76	2.64	2.65	2.67	2.5	2.54	2.47	2.96	2.96	2.96	2.9	2.92	2.88	2.8	2.79	2.8	2.7	2.7	2.7	2.62	2.58	2.6	2.46	2.45	2.44	2.98	2.95	2.94	2.93	2.92	2.91	2.79	2.8	2.84	2.68	2.7	2.69	2.57
3551	2.98	2.96	2.95	2.95	2.93	2.89	2.83	2.82	2.82	2.83	2.75	2.76	2.64	2.65	2.67	2.5	2.54	2.47	2.96	2.96	2.96	2.9	2.92	2.88	2.8	2.79	2.8	2.7	2.7	2.7	2.62	2.58	2.6	2.46	2.45	2.44	2.98	2.96	2.94	2.93	2.92	2.91	2.79	2.79	2.84	2.68	2.7	2.69	2.57
3561	2.98	2.96	2.95	2.95	2.93	2.89	2.83	2.82	2.82	2.83	2.75	2.76	2.64	2.65	2.67	2.5	2.54	2.47	2.96	2.96	2.96	2.9	2.92	2.88	2.8	2.79	2.8	2.7	2.7	2.7	2.62	2.58	2.6	2.46	2.45	2.44	2.98	2.95	2.94	2.93	2.92	2.91	2.79	2.8	2.84	2.68	2.7	2.69	2.57
3571	2.98	2.96	2.95	2.95	2.93	2.88	2.83	2.82	2.82	2.83	2.75	2.76	2.64	2.65	2.67	2.5	2.54	2.47	2.96	2.96	2.96	2.9	2.92	2.88	2.8	2.79	2.8	2.7	2.7	2.7	2.62	2.58	2.6	2.46	2.45	2.44	2.98	2.95	2.94	2.93	2.92	2.91	2.79	2.8	2.84	2.68	2.7	2.69	2.57
3581	2.98	2.96	2.95	2.95	2.93	2.88	2.83	2.82	2.82	2.83	2.74	2.76	2.64	2.65	2.67	2.5	2.54	2.47	2.96	2.96	2.96	2.9	2.92	2.88	2.8	2.79	2.8	2.7	2.7	2.7	2.62	2.58	2.6	2.46	2.45	2.44	2.98	2.95	2.94	2.93	2.92	2.91	2.79	2.79	2.83	2.68	2.7	2.69	2.57
3591	2.98	2.96	2.95	2.95	2.93	2.88	2.83	2.82	2.82	2.83	2.75	2.76	2.64	2.65	2.67	2.5	2.54	2.47	2.96	2.96	2.96	2.9	2.92	2.88	2.8	2.79	2.8	2.7	2.7	2.7	2.62	2.58	2.6	2.46	2.45	2.44	2.98	2.95	2.94	2.93	2.92	2.91	2.79	2.79	2.83	2.68	2.7	2.69	2.57
3601	2.98	2.96	2.95	2.95	2.93	2.88	2.83	2.82	2.82	2.83	2.74	2.76	2.64	2.65	2.67	2.5	2.54	2.47	2.96	2.96	2.96	2.9	2.92	2.88	2.8	2.79	2.8	2.7	2.7	2.7	2.62	2.58	2.6	2.46	2.45	2.44	2.98	2.95	2.94	2.93	2.92	2.91	2.79	2.79	2.83	2.68	2.7	2.69	2.57
[truncated: 95 more columns]

## Sheet: Proximate analyses
The table presents results form proximate analysis of biomass and torrefied biomass.
Cultivation, -	Temperature, °C	Time, min	Moisture, %	Organic matter content, %	Combustible content, %	Ash, %
S(G-)(I-)	-	-	4.7259	89.2022	91.2176	8.78237
S(G-)(I-)	-	-	4.64372	89.6198	91.6023	8.39772
S(G-)(I-)	-	-	4.54818	88.847	90.8367	9.16326
S(G+)(I-)	-	-	5.81836	90.2935	92.2009	7.79909
S(G+)(I-)	-	-	5.8893	90.4353	92.3608	7.63918
S(G+)(I-)	-	-	5.81748	90.3427	92.2118	7.78816
S(G-)(I+)	-	-	5.94915	89.8814	91.7299	8.27011
S(G-)(I+)	-	-	5.98181	89.9464	91.7657	8.2343
S(G-)(I+)	-	-	5.94207	90.4762	92.2434	7.75661
S(G+)(I+)	-	-	5.82341	89.5502	91.046	8.95397
S(G+)(I+)	-	-	5.76501	90.3472	91.8395	8.16046
S(G+)(I+)	-	-	5.73397	90.2848	91.7894	8.21064
C(G+)(I-)	-	-	5.22403	90.6391	92.2811	7.71886
C(G+)(I-)	-	-	5.23313	91.0837	92.7029	7.29707
C(G+)(I-)	-	-	5.21436	91.2906	92.8474	7.15262
C(G-)(I-)	-	-	5.02269	89.5083	91.3136	8.68642
C(G-)(I-)	-	-	5.0449	89.8204	91.6162	8.38381
C(G-)(I-)	-	-	5.04102	89.9344	91.7144	8.28563
C(G+)(I+)	-	-	5.589	89.6376	91.1361	8.86385
C(G+)(I+)	-	-	5.66301	90.2029	91.672	8.32805
C(G+)(I+)	-	-	5.61158	89.7281	91.1457	8.85433
C(G-)(I+)	-	-	5.57053	91.2676	92.9274	7.07263
C(G-)(I+)	-	-	5.57595	91.7831	93.2542	6.74582
C(G-)(I+)	-	-	5.55998	91.3217	92.9542	7.04581
S(G-)(I-)	200	20	2.13363	85.3224	87.4309	12.5691
S(G-)(I-)	200	20	2.30447	86.1942	88.2978	11.7022
S(G-)(I-)	200	20	2.24215	87.37	89.4801	10.5199
S(G+)(I-)	200	20	1.80495	90.3727	92.2108	7.78917
S(G+)(I-)	200	20	2.06052	90.9239	92.7228	7.27716
S(G+)(I-)	200	20	2.17695	91.5476	93.3136	6.6864
S(G-)(I+)	200	20	3.04057	90.5922	92.5766	7.4234
S(G-)(I+)	200	20	3.0545	89.4049	91.2685	8.73147
S(G-)(I+)	200	20	3.36899	89.5303	91.3408	8.65922
S(G+)(I+)	200	20	2.65602	90.8196	92.3172	7.68284
S(G+)(I+)	200	20	2.6166	91.0471	92.4623	7.53769
S(G+)(I+)	200	20	2.9	90.7827	92.1936	7.80639
C(G+)(I-)	200	20	4.79775	89.4781	91.2493	8.75066
C(G+)(I-)	200	20	4.66446	90.5303	92.4453	7.55471
C(G+)(I-)	200	20	4.55179	90.5562	91.9023	8.09767
C(G-)(I-)	200	20	4.64555	89.381	91.4584	8.5416
C(G-)(I-)	200	20	4.80817	89.6138	91.6342	8.36578
C(G-)(I-)	200	20	4.64093	89.6895	91.7348	8.26516
C(G+)(I+)	200	20	4.72417	88.7778	90.4937	9.50626
C(G+)(I+)	200	20	4.73278	88.7696	90.5168	9.48321
C(G+)(I+)	200	20	4.45199	89.3753	91.0468	8.9532
C(G-)(I+)	200	20	4.59265	90.2993	92.162	7.83801
C(G-)(I+)	200	20	4.53275	90.64	92.512	7.48797
C(G-)(I+)	200	20	4.51741	90.5169	92.4865	7.51355
S(G-)(I-)	200	40	2.92497	86.4513	88.7215	11.2785
S(G-)(I-)	200	40	2.78554	87.2856	89.504	10.496
S(G-)(I-)	200	40	2.73629	87.0466	89.1694	10.8306
S(G+)(I-)	200	40	3.09169	89.4779	91.608	8.39195
S(G+)(I-)	200	40	3.05722	90.0955	92.1786	7.82139
S(G+)(I-)	200	40	3.14483	90.5868	92.533	7.467
S(G-)(I+)	200	40	3.23938	88.409	90.4723	9.52766
S(G-)(I+)	200	40	3.39395	88.864	90.9235	9.07651
S(G-)(I+)	200	40	3.30611	89.5085	91.6963	8.30365
S(G+)(I+)	200	40	3.11688	89.8948	91.689	8.31099
S(G+)(I+)	200	40	3.10022	89.3633	91.2095	8.79052
S(G+)(I+)	200	40	3.18145	90.0695	91.8524	8.14761
C(G+)(I-)	200	40	4.42354	89.7906	91.7906	8.20942
C(G+)(I-)	200	40	4.39517	90.4085	92.331	7.669
C(G+)(I-)	200	40	4.28012	90.6266	92.6105	7.38952
C(G-)(I-)	200	40	4.35435	89.0947	91.1355	8.86447
C(G-)(I-)	200	40	4.29343	89.198	91.3207	8.67928
C(G-)(I-)	200	40	4.32486	89.4282	91.4488	8.55119
C(G+)(I+)	200	40	4.46491	89.0286	90.6214	9.3786
C(G+)(I+)	200	40	4.48092	88.4356	90.0801	9.91988
C(G+)(I+)	200	40	4.31994	88.0054	89.692	10.308
C(G-)(I+)	200	40	4.19216	90.4219	92.2851	7.71485
C(G-)(I+)	200	40	4.14404	90.3568	92.1826	7.81742
C(G-)(I+)	200	40	4.14802	90.6704	92.445	7.555
S(G-)(I-)	200	60	2.33231	84.8667	87.2455	12.7545
S(G-)(I-)	200	60	2.3258	85.5757	88.0843	11.9157
S(G-)(I-)	200	60	2.40357	86.2363	88.6197	11.3803
S(G+)(I-)	200	60	2.31191	89.9519	92.0778	7.92218
S(G+)(I-)	200	60	2.14496	89.7673	91.8866	8.11344
S(G+)(I-)	200	60	2.38118	90.4869	92.5749	7.42511
S(G-)(I+)	200	60	2.5016	88.3553	90.6391	9.3609
S(G-)(I+)	200	60	2.44447	88.8438	90.9649	9.03514
S(G-)(I+)	200	60	2.47871	89.5093	91.5898	8.41021
S(G+)(I+)	200	60	1.93859	89.4029	91.3096	8.69042
S(G+)(I+)	200	60	2.04445	89.4016	91.192	8.80804
S(G+)(I+)	200	60	1.98398	89.8508	91.7989	8.20108
C(G+)(I-)	200	60	4.20896	91.3057	93.1027	6.89727
C(G+)(I-)	200	60	4.35918	91.0103	92.9007	7.09935
C(G+)(I-)	200	60	4.18822	90.9459	92.8253	7.17475
C(G-)(I-)	200	60	4.3648	89.4797	91.5943	8.40574
C(G-)(I-)	200	60	4.24273	89.7874	91.8927	8.10726
C(G-)(I-)	200	60	4.19748	89.5264	91.6649	8.33507
C(G+)(I+)	200	60	4.00119	88.9234	90.7229	9.27707
C(G+)(I+)	200	60	3.93512	87.6902	89.4517	10.5483
C(G+)(I+)	200	60	3.94552	89.2098	90.9508	9.04921
C(G-)(I+)	200	60	3.83153	90.3776	92.2397	7.76032
C(G-)(I+)	200	60	3.72233	91.0763	92.7691	7.23093
C(G-)(I+)	200	60	3.8431	91.4593	93.1943	6.80574
S(G-)(I-)	220	20	1.2214	84.8851	87.2658	12.7342
S(G-)(I-)	220	20	1.37697	84.9522	87.3395	12.6605
S(G-)(I-)	220	20	1.83092	85.4974	88.1268	11.8732
S(G+)(I-)	220	20	3.58445	89.708	91.7769	8.22306
S(G+)(I-)	220	20	4.44195	90.3719	92.3915	7.60846
S(G+)(I-)	220	20	4.46411	89.8021	91.8543	8.14565
S(G-)(I+)	220	20	4.32976	89.5747	91.6759	8.32407
S(G-)(I+)	220	20	4.24607	89.0585	91.0385	8.96153
S(G-)(I+)	220	20	4.24021	89.02	91.1104	8.88964
S(G+)(I+)	220	20	4.02438	88.7411	90.4848	9.51517
S(G+)(I+)	220	20	3.90953	89.3567	91.2033	8.79667
S(G+)(I+)	220	20	3.89137	88.8655	90.6263	9.37368
C(G+)(I-)	220	20	4.6642	90.6352	92.063	7.93701
C(G+)(I-)	220	20	4.65395	90.4787	92.0184	7.98156
C(G+)(I-)	220	20	4.49438	90.3571	92.0483	7.95168
C(G-)(I-)	220	20	4.61153	89.7846	91.4451	8.55491
C(G-)(I-)	220	20	4.46722	90.1271	92.1371	7.86295
C(G-)(I-)	220	20	4.41147	90.2559	92.081	7.91903
C(G+)(I+)	220	20	4.40607	88.6328	90.2107	9.78927
C(G+)(I+)	220	20	4.40283	88.5693	90.1428	9.85725
C(G+)(I+)	220	20	4.35739	89.1641	90.7837	9.2163
C(G-)(I+)	220	20	4.25574	90.9119	92.7483	7.25167
C(G-)(I+)	220	20	4.25384	91.4785	93.0496	6.95037
C(G-)(I+)	220	20	4.14041	91.5493	93.0412	6.95879
S(G-)(I-)	220	40	4.12139	86.359	88.8095	11.1905
S(G-)(I-)	220	40	4.00278	84.2111	86.6529	13.3471
S(G-)(I-)	220	40	4.09513	85.5335	88.0749	11.9251
S(G+)(I-)	220	40	4.09984	89.1711	91.3034	8.69656
S(G+)(I-)	220	40	4.13305	89.9023	92.0528	7.94723
S(G+)(I-)	220	40	4.11037	89.6408	91.7245	8.27545
S(G-)(I+)	220	40	3.94432	88.8889	90.9683	9.03172
S(G-)(I+)	220	40	3.9552	88.8329	90.9549	9.04507
S(G-)(I+)	220	40	3.91789	88.8108	90.9667	9.03327
S(G+)(I+)	220	40	3.31331	88.2665	90.0501	9.9499
S(G+)(I+)	220	40	3.3892	88.6035	90.463	9.53705
S(G+)(I+)	220	40	3.29317	89.2234	90.9261	9.07392
C(G+)(I-)	220	40	3.95079	89.0243	90.8779	9.12215
C(G+)(I-)	220	40	3.84844	88.9829	90.7365	9.26346
C(G+)(I-)	220	40	3.92432	88.7777	90.497	9.50297
C(G-)(I-)	220	40	3.87767	88.7295	90.6633	9.33666
C(G-)(I-)	220	40	3.84921	88.4763	90.5658	9.43416
C(G-)(I-)	220	40	3.76457	89.1442	91.2036	8.79644
C(G+)(I+)	220	40	3.77226	88.4278	89.9436	10.0564
C(G+)(I+)	220	40	3.69552	88.561	90.0521	9.94786
C(G+)(I+)	220	40	3.60964	88.2054	89.8651	10.1349
C(G-)(I+)	220	40	3.3241	89.9713	91.7622	8.23782
C(G-)(I+)	220	40	3.25619	90.0269	91.7357	8.26429
C(G-)(I+)	220	40	3.2271	90.192	91.9368	8.06318
S(G-)(I-)	220	60	3.76505	84.1813	86.6736	13.3264
S(G-)(I-)	220	60	3.07554	84.9353	87.3485	12.6515
S(G-)(I-)	220	60	3.12036	88.2533	90.184	9.81595
S(G+)(I-)	220	60	4.14101	87.1543	89.5059	10.4941
S(G+)(I-)	220	60	3.14108	86.7294	89.0426	10.9574
S(G+)(I-)	220	60	2.92355	87.2406	89.5924	10.4076
S(G-)(I+)	220	60	5.30746	88.5287	90.4946	9.50539
S(G-)(I+)	220	60	5.32985	88.4852	90.4185	9.58147
S(G-)(I+)	220	60	5.4592	88.5449	90.5462	9.45383
S(G+)(I+)	220	60	5.17825	88.6788	90.3382	9.66184
S(G+)(I+)	220	60	5.14065	89.1406	90.8322	9.1678
S(G+)(I+)	220	60	5.07517	89.4664	91.1884	8.81165
C(G+)(I-)	220	60	4.48667	89.5115	91.3967	8.60327
C(G+)(I-)	220	60	4.44244	89.4218	91.3107	8.68926
C(G+)(I-)	220	60	4.32883	89.477	91.4176	8.5824
C(G-)(I-)	220	60	4.33087	89.1793	91.2075	8.79247
C(G-)(I-)	220	60	4.32965	88.8577	89.9293	10.0707
C(G-)(I-)	220	60	4.18489	89.4802	91.6278	8.37224
C(G+)(I+)	220	60	4.23982	86.8945	88.5092	11.4908
C(G+)(I+)	220	60	4.20312	87.7926	89.3986	10.6014
C(G+)(I+)	220	60	4.21735	87.811	89.5077	10.4923
C(G-)(I+)	220	60	4.08123	89.7883	91.677	8.32296
C(G-)(I+)	220	60	4.18035	90.0177	91.8251	8.17492
C(G-)(I+)	220	60	3.93867	90.3599	92.1753	7.82473
S(G-)(I-)	240	20	5.76923	87.7444	89.8814	10.1186
S(G-)(I-)	240	20	5.77305	88.3898	90.4777	9.5223
S(G-)(I-)	240	20	5.69122	89.2146	91.2583	8.74171
S(G+)(I-)	240	20	5.80838	90.0826	92.0004	7.99958
S(G+)(I-)	240	20	5.76751	91.1628	93.0444	6.9556
S(G+)(I-)	240	20	5.72901	91.3612	93.2583	6.74169
S(G-)(I+)	240	20	5.77383	89.4275	91.4488	8.55117
S(G-)(I+)	240	20	5.70998	89.4849	91.4964	8.50362
S(G-)(I+)	240	20	5.88117	89.8912	91.9386	8.06142
S(G+)(I+)	240	20	5.71974	88.357	89.9669	10.0331
S(G+)(I+)	240	20	5.66597	89.4759	91.0273	8.97275
S(G+)(I+)	240	20	5.62309	90.2513	91.9791	8.02094
C(G+)(I-)	240	20	3.74763	88.5782	90.525	9.47499
C(G+)(I-)	240	20	3.79061	88.9931	91.0569	8.94309
C(G+)(I-)	240	20	3.74379	89.4563	91.4784	8.52161
C(G-)(I-)	240	20	3.94499	87.6894	90.0721	9.92789
C(G-)(I-)	240	20	3.84692	87.6026	89.9096	10.0904
C(G-)(I-)	240	20	3.8562	87.8839	90.0877	9.91226
C(G+)(I+)	240	20	3.86181	86.1111	87.8666	12.1334
C(G+)(I+)	240	20	3.80391	86.7566	88.6352	11.3648
C(G+)(I+)	240	20	3.97654	87.1519	88.9533	11.0467
C(G-)(I+)	240	20	3.69739	88.7629	90.6461	9.35387
C(G-)(I+)	240	20	3.81771	89.6093	91.4589	8.54115
C(G-)(I+)	240	20	3.5314	89.7892	91.7326	8.26735
S(G-)(I-)	240	40	5.13644	86.0829	88.5258	11.4742
S(G-)(I-)	240	40	5.14587	88.0179	90.314	9.68603
S(G-)(I-)	240	40	5.2074	87.3049	89.7828	10.2172
S(G+)(I-)	240	40	5.24363	89.0276	91.3131	8.68691
S(G+)(I-)	240	40	5.153	90.6683	92.7175	7.28247
S(G+)(I-)	240	40	5.09617	90.7647	92.8019	7.19808
S(G-)(I+)	240	40	5.14883	87.3728	89.5992	10.4008
S(G-)(I+)	240	40	5.21836	88.4755	90.7419	9.25807
S(G-)(I+)	240	40	5.24326	88.4817	90.7812	9.21882
S(G+)(I+)	240	40	5.29206	87.8967	89.9209	10.0791
S(G+)(I+)	240	40	5.26421	88.8129	90.8125	9.18754
S(G+)(I+)	240	40	5.26579	88.4928	90.539	9.46103
C(G+)(I-)	240	40	3.57608	89.0505	91.0139	8.98608
C(G+)(I-)	240	40	3.63348	88.8946	90.9138	9.08623
C(G+)(I-)	240	40	3.53505	88.8716	90.8696	9.13043
C(G-)(I-)	240	40	3.52361	88.5005	90.6188	9.3812
C(G-)(I-)	240	40	3.50737	88.5658	90.7155	9.28445
C(G-)(I-)	240	40	3.5086	88.5217	90.749	9.25101
C(G+)(I+)	240	40	3.62319	85.6099	87.6253	12.3747
C(G+)(I+)	240	40	3.74863	85.7645	87.655	12.345
C(G+)(I+)	240	40	3.7826	85.9714	87.9371	12.0629
C(G-)(I+)	240	40	3.81962	89.0425	91.0905	8.90945
C(G-)(I+)	240	40	3.73682	89.617	91.5997	8.40029
C(G-)(I+)	240	40	3.72881	89.2295	91.3007	8.69925
S(G-)(I-)	240	60	4.41723	82.0607	85.4322	14.5678
S(G-)(I-)	240	60	4.40924	82.2884	85.5499	14.4501
S(G-)(I-)	240	60	4.39429	82.4298	84.3727	15.6273
S(G+)(I-)	240	60	4.16499	82.5322	86.03	13.97
S(G+)(I-)	240	60	4.27029	82.7675	86.183	13.817
S(G+)(I-)	240	60	6.01309	88.9209	91.4056	8.59441
S(G-)(I+)	240	60	6.26501	85.6289	88.0525	11.9475
S(G-)(I+)	240	60	6.22703	86.2847	88.9112	11.0888
S(G-)(I+)	240	60	6.1804	86.3865	88.8461	11.1539
S(G+)(I+)	240	60	5.99198	86.3249	88.2115	11.7885
S(G+)(I+)	240	60	5.93794	86.7611	88.7808	11.2192
S(G+)(I+)	240	60	5.83099	86.1345	88.0422	11.9578
C(G+)(I-)	240	60	5.13103	88.7085	90.6062	9.39378
C(G+)(I-)	240	60	5.13874	89.018	90.8765	9.12355
C(G+)(I-)	240	60	5.08338	89.9767	91.7549	8.24513
C(G-)(I-)	240	60	5.0881	88.0371	90.0605	9.93951
C(G-)(I-)	240	60	5.09232	88.2962	90.3567	9.64334
C(G-)(I-)	240	60	4.98181	88.0995	90.1095	9.89046
C(G+)(I+)	240	60	5.13957	87.3579	88.9939	11.0061
C(G+)(I+)	240	60	5.17754	87.3117	89.1213	10.8787
C(G+)(I+)	240	60	5.13178	86.6024	88.3426	11.6574
C(G-)(I+)	240	60	4.97796	88.8268	90.7347	9.26531
C(G-)(I+)	240	60	4.92557	88.9029	90.7104	9.28962
C(G-)(I+)	240	60	4.93464	89.0109	90.8548	9.14517
S(G-)(I-)	260	20	5.14602	85.2214	87.4721	12.5279
S(G-)(I-)	260	20	5.23626	87.5509	89.8294	10.1706
S(G-)(I-)	260	20	5.17675	87.1269	89.3149	10.6851
S(G+)(I-)	260	20	5.41486	89.631	91.6561	8.34388
S(G+)(I-)	260	20	5.47945	90.5158	92.5831	7.41688
S(G+)(I-)	260	20	5.4087	90.2193	92.2829	7.71711
S(G-)(I+)	260	20	5.30501	89.1889	91.3043	8.69565
S(G-)(I+)	260	20	5.43904	88.7085	90.7567	9.24334
S(G-)(I+)	260	20	5.22734	89.3954	91.4351	8.56489
S(G+)(I+)	260	20	5.31411	88.8924	90.6283	9.37167
S(G+)(I+)	260	20	5.37978	89.9789	91.7932	8.20675
S(G+)(I+)	260	20	5.27486	89.8016	91.5831	8.4169
C(G+)(I-)	260	20	4.61755	90.5388	92.2437	7.75626
C(G+)(I-)	260	20	4.61446	90.2719	91.9899	8.01012
C(G+)(I-)	260	20	4.64553	90.0127	91.8132	8.18682
C(G-)(I-)	260	20	4.70295	88.6316	90.6538	9.34619
C(G-)(I-)	260	20	4.63788	89.2437	91.1555	8.84454
C(G-)(I-)	260	20	4.64557	89.4162	91.3377	8.66233
C(G+)(I+)	260	20	4.545	87.0021	88.6411	11.3589
C(G+)(I+)	260	20	4.6071	88.3128	90.0585	9.94146
C(G+)(I+)	260	20	4.45271	88.9859	90.627	9.37303
C(G-)(I+)	260	20	4.49925	90.1876	91.8739	8.12605
C(G-)(I+)	260	20	4.44333	90.418	92.163	7.83699
C(G-)(I+)	260	20	4.30825	90.5622	92.2004	7.79962
S(G-)(I-)	260	40	5.14457	82.7097	85.5371	14.4629
S(G-)(I-)	260	40	5.12021	84.7858	87.4788	12.5212
S(G-)(I-)	260	40	5.10453	84.6006	87.3276	12.6724
S(G+)(I-)	260	40	5.35013	87.194	89.6317	10.3683
S(G+)(I-)	260	40	5.20192	87.9629	90.2114	9.78855
S(G+)(I-)	260	40	5.32331	88.0983	90.5654	9.43456
S(G-)(I+)	260	40	6.49881	85.8542	88.1001	11.8999
S(G-)(I+)	260	40	5.96079	85.2063	87.4603	12.5397
S(G-)(I+)	260	40	6.03421	85.4367	87.7485	12.2515
S(G+)(I+)	260	40	6.67066	87.0299	88.8141	11.1859
S(G+)(I+)	260	40	6.39155	86.957	88.8065	11.1935
S(G+)(I+)	260	40	6.27119	85.4204	87.1948	12.8052
C(G+)(I-)	260	40	4.68845	88.5327	90.5744	9.42558
C(G+)(I-)	260	40	4.70553	86.6077	88.8398	11.1602
C(G+)(I-)	260	40	4.59873	88.7767	90.9422	9.05778
C(G-)(I-)	260	40	4.6853	87.5	89.7996	10.2004
C(G-)(I-)	260	40	4.6248	88.1245	90.4281	9.57189
C(G-)(I-)	260	40	4.5381	87.8666	90.1641	9.83589
C(G+)(I+)	260	40	4.82863	84.8427	86.8022	13.1978
C(G+)(I+)	260	40	4.84776	84.5263	86.4526	13.5474
C(G+)(I+)	260	40	4.58279	80.6865	82.6121	17.3879
C(G-)(I+)	260	40	4.69126	87.3475	89.5562	10.4438
C(G-)(I+)	260	40	4.71025	88.2905	90.3879	9.61214
C(G-)(I+)	260	40	4.51774	87.3129	89.4169	10.5831
S(G-)(I-)	260	60	5.29195	80.1491	82.985	17.015
S(G-)(I-)	260	60	5.2621	82.774	85.5246	14.4754
S(G-)(I-)	260	60	5.22928	81.2394	84.115	15.885
S(G+)(I-)	260	60	6.20551	84.9401	87.7084	12.2916
S(G+)(I-)	260	60	6.58251	85.8859	88.5993	11.4007
S(G+)(I-)	260	60	6.13974	85.9403	88.627	11.373
S(G-)(I+)	260	60	6.43515	83.656	86.4371	13.5629
S(G-)(I+)	260	60	6.63322	84.1036	86.9841	13.0159
S(G-)(I+)	260	60	6.4948	84.4091	87.305	12.695
S(G+)(I+)	260	60	6.23557	82.8871	85.2538	14.7462
S(G+)(I+)	260	60	6.07646	83.901	86.3432	13.6568
S(G+)(I+)	260	60	6.22514	84.7402	87.2959	12.7041
C(G+)(I-)	260	60	4.63938	87.7904	89.9365	10.0635
C(G+)(I-)	260	60	4.74769	87.9833	90.1672	9.83281
C(G+)(I-)	260	60	4.56003	87.5879	89.7826	10.2174
C(G-)(I-)	260	60	4.76528	86.4337	88.9302	11.0698
C(G-)(I-)	260	60	4.64415	86.4221	88.9416	11.0584
C(G-)(I-)	260	60	4.58229	86.4632	89.0322	10.9678
C(G+)(I+)	260	60	5.0782	82.6664	85.0096	14.9904
C(G+)(I+)	260	60	5.09365	83.8363	86.0708	13.9292
C(G+)(I+)	260	60	5.12564	84.6892	86.9579	13.0421
C(G-)(I+)	260	60	3.91084	87.4068	89.6541	10.3459
C(G-)(I+)	260	60	4.88862	87.3145	89.5189	10.4811
C(G-)(I+)	260	60	4.69018	87.6445	89.9141	10.0859
S(G-)(I-)	280	20	4.90675	85.1914	87.6036	12.3964
S(G-)(I-)	280	20	4.72865	84.0419	86.534	13.466
S(G-)(I-)	280	20	4.87179	84.7709	87.1968	12.8032
S(G+)(I-)	280	20	4.99146	89.0169	91.2896	8.71036
S(G+)(I-)	280	20	5.16687	88.2234	88.2234	11.7766
S(G+)(I-)	280	20	4.97032	89.243	91.5087	8.49127
S(G-)(I+)	280	20	5.04219	87.5926	89.7927	10.2073
S(G-)(I+)	280	20	4.89005	88.1334	90.4561	9.54392
S(G-)(I+)	280	20	4.999	88.0475	90.3582	9.64184
S(G+)(I+)	280	20	4.86757	88.0227	89.9033	10.0967
S(G+)(I+)	280	20	4.94516	87.7176	89.5637	10.4363
S(G+)(I+)	280	20	4.78326	87.954	89.8378	10.1622
C(G+)(I-)	280	20	4.61788	87.5931	89.8063	10.1937
C(G+)(I-)	280	20	4.5332	87.6582	89.8442	10.1558
C(G+)(I-)	280	20	4.49559	88.1858	90.2984	9.70157
C(G-)(I-)	280	20	4.57529	85.887	88.3469	11.6531
C(G-)(I-)	280	20	4.51375	86.5491	88.9387	11.0613
C(G-)(I-)	280	20	4.60737	87.4843	89.8467	10.1533
C(G+)(I+)	280	20	4.52216	84.3069	86.2857	13.7143
C(G+)(I+)	280	20	4.60422	86.3025	88.2519	11.7481
C(G+)(I+)	280	20	4.51567	86.319	88.2403	11.7597
C(G-)(I+)	280	20	4.47479	88.4403	90.6208	9.37924
C(G-)(I+)	280	20	4.43825	88.7014	90.7529	9.24711
C(G-)(I+)	280	20	4.50523	89.0059	91.112	8.88795
S(G-)(I-)	280	40	6.81955	79.6131	82.6652	17.3348
S(G-)(I-)	280	40	6.87275	80.9109	84.1336	15.8664
S(G-)(I-)	280	40	6.80503	81.0385	84.379	15.621
S(G+)(I-)	280	40	9.67492	85.2078	88.2069	11.7931
S(G+)(I-)	280	40	6.91452	84.8746	87.932	12.068
S(G+)(I-)	280	40	6.87688	84.8436	87.8319	12.1681
S(G-)(I+)	280	40	7.17651	83.2739	86.3298	13.6702
S(G-)(I+)	280	40	7.16914	84.0189	87.1358	12.8642
S(G-)(I+)	280	40	7.17636	83.8065	87.1613	12.8387
S(G+)(I+)	280	40	7.0037	82.327	84.8303	15.1697
S(G+)(I+)	280	40	7.10792	83.8152	86.3729	13.6271
S(G+)(I+)	280	40	6.89863	83.4249	86.0743	13.9257
C(G+)(I-)	280	40	4.3224	87.7422	89.8974	10.1026
C(G+)(I-)	280	40	4.35084	88.1774	90.2497	9.75028
C(G+)(I-)	280	40	4.32774	88.2557	90.2603	9.73971
C(G-)(I-)	280	40	4.34172	86.195	88.7317	11.2683
C(G-)(I-)	280	40	4.4246	87.2034	89.6704	10.3296
C(G-)(I-)	280	40	4.427	87.3145	89.7779	10.2221
C(G+)(I+)	280	40	4.38906	83.9173	85.9223	14.0777
C(G+)(I+)	280	40	4.32228	83.4287	85.5314	14.4686
C(G+)(I+)	280	40	4.39156	85.4911	87.668	12.332
C(G-)(I+)	280	40	4.38916	87.9522	90.184	9.81595
C(G-)(I+)	280	40	4.53553	87.9717	90.2277	9.77233
C(G-)(I+)	280	40	4.4144	88.0071	90.233	9.76701
S(G-)(I-)	280	60	6.7492	78.3298	81.8094	18.1906
S(G-)(I-)	280	60	6.89179	79.7031	83.3192	16.6808
S(G-)(I-)	280	60	6.5876	80.0704	83.5272	16.4728
S(G+)(I-)	280	60	6.66334	83.5952	86.7051	13.2949
S(G+)(I-)	280	60	6.45194	84.6129	87.778	12.222
S(G+)(I-)	280	60	6.55176	84.554	87.7144	12.2856
S(G-)(I+)	280	60	7.28648	82.7893	85.9459	14.0541
S(G-)(I+)	280	60	7.31878	83.432	86.638	13.362
S(G-)(I+)	280	60	7.23409	83.7582	87.0496	12.9504
S(G+)(I+)	280	60	6.94347	82.3137	84.9801	15.0199
S(G+)(I+)	280	60	7.14071	83.1987	85.8266	14.1734
S(G+)(I+)	280	60	7.01931	82.9332	85.5721	14.4279
C(G+)(I-)	280	60	4.959	84.9392	87.5585	12.4415
C(G+)(I-)	280	60	4.92507	86.3612	88.9566	11.0434
C(G+)(I-)	280	60	4.9302	86.2126	88.8576	11.1424
C(G-)(I-)	280	60	4.79281	84.2999	87.1841	12.8159
C(G-)(I-)	280	60	4.86633	85.0121	87.9381	12.0619
C(G-)(I-)	280	60	4.97818	84.9927	87.8835	12.1165
C(G+)(I+)	280	60	5.09694	78.0539	80.476	19.524
C(G+)(I+)	280	60	5.2852	82.0489	84.6389	15.3611
C(G+)(I+)	280	60	5.25944	81.0868	83.6335	16.3665
C(G-)(I+)	280	60	5.25218	84.135	86.9014	13.0986
C(G-)(I+)	280	60	5.24525	84.851	87.5555	12.4445
C(G-)(I+)	280	60	5.30746	85.5171	88.1836	11.8164
S(G-)(I-)	300	20	5.52043	78.466	81.4087	18.5913
S(G-)(I-)	300	20	5.60701	81.0825	84.2266	15.7734
S(G-)(I-)	300	20	5.39024	78.9474	81.9443	18.0557
S(G+)(I-)	300	20	5.9602	84.0863	87.0384	12.9616
S(G+)(I-)	300	20	6.15203	85.114	87.9504	12.0496
S(G+)(I-)	300	20	6.01893	85.1129	82.7378	17.2622
S(G-)(I+)	300	20	6.16534	83.1334	86.1374	13.8626
S(G-)(I+)	300	20	6.33557	84.2526	87.304	12.696
S(G-)(I+)	300	20	6.3181	84.324	87.2265	12.7735
S(G+)(I+)	300	20	6.17247	84.0175	86.4911	13.5089
S(G+)(I+)	300	20	6.16246	83.9872	86.4179	13.5821
S(G+)(I+)	300	20	6.17296	84.3733	86.969	13.031
C(G+)(I-)	300	20	5.23925	85.9593	89.5068	10.4932
C(G+)(I-)	300	20	5.20927	86.6476	89.1465	10.8535
C(G+)(I-)	300	20	5.2511	86.497	89.0104	10.9896
C(G-)(I-)	300	20	5.06457	84.474	87.152	12.848
C(G-)(I-)	300	20	5.12159	85.647	88.3774	11.6226
C(G-)(I-)	300	20	5.05394	85.3987	88.1338	11.8662
C(G+)(I+)	300	20	5.48441	83.916	86.2743	13.7257
C(G+)(I+)	300	20	5.49839	84.1785	86.6126	13.3874
C(G+)(I+)	300	20	5.4111	84.2602	86.6058	13.3942
C(G-)(I+)	300	20	7.3326	85.9888	88.6193	11.3807
C(G-)(I+)	300	20	5.31114	86.5739	89.1482	10.8518
C(G-)(I+)	300	20	5.31506	86.2424	88.7628	11.2372
S(G-)(I-)	300	40	7.3014	79.6533	83.6295	16.3705
S(G-)(I-)	300	40	7.00342	77.7646	81.5408	18.4592
S(G-)(I-)	300	40	7.08433	80.2452	84.1273	15.8727
S(G+)(I-)	300	40	7.57107	82.2793	85.8299	14.1701
S(G+)(I-)	300	40	7.55059	83.317	86.8344	13.1656
S(G+)(I-)	300	40	7.47167	83.4164	86.9174	13.0826
S(G-)(I+)	300	40	7.51024	81.9674	85.4227	14.5773
S(G-)(I+)	300	40	7.58015	82.6561	86.1898	13.8102
S(G-)(I+)	300	40	7.50174	82.8762	86.4688	13.5312
S(G+)(I+)	300	40	7.35648	82.2338	85.1262	14.8738
S(G+)(I+)	300	40	7.21019	82.9353	85.9289	14.0711
S(G+)(I+)	300	40	7.32858	83.4362	86.4912	13.5088
C(G+)(I-)	300	40	5.25155	83.7106	86.4502	13.5498
C(G+)(I-)	300	40	5.3487	85.5968	88.2818	11.7182
C(G+)(I-)	300	40	5.3261	85.8401	88.5469	11.4531
C(G-)(I-)	300	40	5.45344	83.2514	86.3277	13.6723
C(G-)(I-)	300	40	5.56109	83.8434	86.9987	13.0013
C(G-)(I-)	300	40	5.49628	84.0009	87.0793	12.9207
C(G+)(I+)	300	40	5.40111	81.4232	83.8476	16.1524
C(G+)(I+)	300	40	5.41273	82.5353	84.9772	15.0228
C(G+)(I+)	300	40	5.39776	82.7118	85.1159	14.8841
C(G-)(I+)	300	40	5.33506	83.8197	86.5585	13.4415
C(G-)(I+)	300	40	5.42024	84.2005	86.9446	13.0554
C(G-)(I+)	300	40	5.40405	84.883	87.5851	12.4149
S(G-)(I-)	300	60	7.25539	78.1865	82.0061	17.9939
S(G-)(I-)	300	60	7.08978	79.0099	82.8902	17.1098
S(G-)(I-)	300	60	7.40262	81.5109	85.4062	14.5938
S(G+)(I-)	300	60	7.17215	83.3082	86.8319	13.1681
S(G+)(I-)	300	60	7.25855	84.0341	87.527	12.473
S(G+)(I-)	300	60	7.16204	83.9816	87.6781	12.3219
S(G-)(I+)	300	60	7.52505	81.9915	85.4914	14.5086
S(G-)(I+)	300	60	7.47352	83.3769	86.8651	13.1349
S(G-)(I+)	300	60	7.44018	82.9025	86.3676	13.6324
S(G+)(I+)	300	60	6.96861	81.9667	84.7394	15.2606
S(G+)(I+)	300	60	7.02805	83.1633	86.1269	13.8731
S(G+)(I+)	300	60	7.02267	83.8535	86.6927	13.3073
C(G+)(I-)	300	60	5.23155	85.6084	88.2075	11.7925
C(G+)(I-)	300	60	5.26157	86.4666	89.0946	10.9054
C(G+)(I-)	300	60	5.3062	86.4967	89.13	10.87
C(G-)(I-)	300	60	5.28577	84.1122	87.0661	12.9339
C(G-)(I-)	300	60	5.35894	83.2041	86.2212	13.7788
C(G-)(I-)	300	60	5.33663	83.9347	86.8842	13.1158
C(G+)(I+)	300	60	5.55388	81.0825	83.624	16.376
C(G+)(I+)	300	60	5.66302	82.9261	85.5079	14.4921
C(G+)(I+)	300	60	5.71855	82.9641	85.5169	14.4831
C(G-)(I+)	300	60	5.51416	85.1209	87.8864	12.1136
C(G-)(I+)	300	60	5.55388	85.129	87.7189	12.2811
C(G-)(I+)	300	60	5.4373	85.1077	87.732	12.268

## Sheet: Ultimate analyses
The first table presents data from ultimate analysis, with H:C and O:C ratio. The second table present high heating value, low heating value, and high heating value without ash in 3 replicates.
Cultivation, -	Temperature, °C	Time, min	C, %	H, %	N, %	S, %	O, %	H:C ratio	O:C ratio		Cultivation, -	Temperature, °C	Time, min	High heating value, J·g-1	Low heating value, J·g-1	High heating value daf, J·g-1
S(G-)(I-)	-	-	44.2	6.74	2.05	0.172	36.061	1.82986	0.611894		S(G-)(I-)	-	-	18176	16591.3	19926
S(G+)(I-)	-	-	44.1	5.95	1.95	0.202	38.1552	1.61905	0.648898		S(G-)(I-)	-	-	18227	16642.3	19898
S(G-)(I+)	-	-	44.9	6.87	2.22	0.213	35.8983	1.83608	0.599638		S(G-)(I-)	-	-	18350	16765.3	20201.1
S(G+)(I+)	-	-	45.1	6.87	2.83	0.198	35.0627	1.82794	0.583083		S(G+)(I-)	-	-	18801	17359.4	20391.3
C(G+)(I-)	-	-	44.1	6.44	2.72	0.211	37.5334	1.75238	0.638324		S(G+)(I-)	-	-	18445	17003.4	19970.6
C(G-)(I-)	-	-	40.2	6.93	2.46	0.219	39.9454	2.06866	0.74525		S(G+)(I-)	-	-	18485	17043.4	20046.2
C(G+)(I+)	-	-	41.8	6.15	2.06	0.189	39.6572	1.76555	0.711553		S(G-)(I+)	-	-	18530	16884.7	20200.6
C(G-)(I+)	-	-	45.7	7.24	2.09	0.193	36.2345	1.90109	0.594658		S(G-)(I+)	-	-	18178	16532.7	19809.1
S(G-)(I-)	200	20	40.6	6.28	2.56	0.168	36.7	1.85616	0.677956		S(G-)(I+)	-	-	18513	16867.7	20069.7
S(G+)(I-)	200	20	40.8	5.94	2.29	0.16	41.8	1.74706	0.768382		S(G+)(I+)	-	-	18574	16933.2	20400.7
S(G-)(I+)	200	20	40.6	6.76	2.8	0.189	39.5	1.99803	0.72968		S(G+)(I+)	-	-	18437	16796.2	20075.2
S(G+)(I+)	200	20	39.6	6.49	2.43	0.196	42.2	1.96667	0.799242		S(G+)(I+)	-	-	18486	16845.2	20139.6
C(G+)(I-)	200	20	48.1	6.99	3.35	0.199	31.6	1.74387	0.492723		C(G+)(I-)	-	-	18606	17072.5	20162.3
C(G-)(I-)	200	20	47.1	6.81	3.09	0.201	32.4	1.73503	0.515924		C(G+)(I-)	-	-	18347	16813.5	19791.2
C(G+)(I+)	200	20	43.1	6.38	3.04	0.196	36.3	1.77633	0.631671		C(G+)(I-)	-	-	18408	16874.5	19826.1
C(G-)(I+)	200	20	43.2	6.5	2.52	0.221	38.5	1.80556	0.668403		C(G-)(I-)	-	-	18513	16877.1	20274.1
S(G-)(I-)	200	40	40.8	5.65	2.43	0.172	37.9	1.66176	0.696691		C(G-)(I-)	-	-	17635	15999.1	19248.8
S(G+)(I-)	200	40	41.9	6.63	2.52	0.175	38.8	1.89881	0.694511		C(G-)(I-)	-	-	18149	16513.1	19788.6
S(G-)(I+)	200	40	42.1	6.59	2.76	0.196	37.3	1.87838	0.664489		C(G+)(I+)	-	-	18248	16768.1	20022.8
S(G+)(I+)	200	40	43.1	4.94	2.62	0.205	38.9	1.37541	0.676914		C(G+)(I+)	-	-	18023	16543.1	19660.3
C(G+)(I-)	200	40	45.4	6.54	3.29	0.193	34.9	1.72863	0.576542		C(G+)(I+)	-	-	17459	15979.1	19155.1
C(G-)(I-)	200	40	46.6	6.73	3.21	0.194	32.5	1.73305	0.523069		C(G-)(I+)	-	-	18539	16822.4	19950
C(G+)(I+)	200	40	44.9	6.53	2.98	0.206	33.9	1.74521	0.566258		C(G-)(I+)	-	-	18176	16459.4	19490.8
C(G-)(I+)	200	40	44	6.51	2.66	0.221	37.1	1.77545	0.632386		C(G-)(I+)	-	-	17786	16069.4	19134.2
S(G-)(I-)	200	60	39.7	5.36	2.67	0.17	37.7	1.62015	0.712217		S(G-)(I-)	200	20	17776	16350.6	20331.5
S(G+)(I-)	200	60	43.4	6.77	2.59	0.18	37.1	1.87189	0.641129		S(G-)(I-)	200	20	16265	14839.6	18420.6
S(G-)(I+)	200	60	42.3	6.56	2.63	0.19	37.2	1.86099	0.659574		S(G-)(I-)	200	20	17402	15976.6	19447.9
S(G+)(I+)	200	60	40.5	5.67	2.28	0.206	40.9	1.68	0.757407		S(G+)(I-)	200	20	18381	17035	19933.7
C(G+)(I-)	200	60	47	6.77	2.89	0.171	34.3	1.72851	0.54734		S(G+)(I-)	200	20	18174	16828	19600.3
C(G-)(I-)	200	60	47.6	6.73	2.95	0.201	32.1	1.69664	0.505777		S(G+)(I-)	200	20	18722	17376	20063.5
C(G+)(I+)	200	60	46.1	6.49	2.91	0.186	32.9	1.68937	0.535249		S(G-)(I+)	200	20	18313	16760.2	19781.5
C(G-)(I+)	200	60	44.6	6.47	2.61	0.224	37.1	1.74081	0.623879		S(G-)(I+)	200	20	18595	17042.2	20373.9
S(G-)(I-)	220	20	45.6	6.78	2.43	0.193	30.1085	1.78421	0.495206		S(G-)(I+)	200	20	18476	16923.2	20227.5
S(G+)(I-)	220	20	46.9	6.61	2.07	0.275	34.1057	1.69126	0.5454		S(G+)(I+)	200	20	18395	16911.6	19925.9
S(G-)(I+)	220	20	44.4	6.12	2.02	0.219	36.4587	1.65405	0.615857		S(G+)(I+)	200	20	18438	16954.6	19941.1
S(G+)(I+)	220	20	45.7	6.43	2.7	0.22	33.9377	1.6884	0.556965		S(G+)(I+)	200	20	18471	16987.6	20035
C(G+)(I-)	220	20	46.3	6.98	3.27	0.191	33.7	1.80907	0.545896		C(G+)(I-)	200	20	19250	17609.9	21096
C(G-)(I-)	220	20	47.2	7.17	2.98	0.193	32.5	1.82288	0.516419		C(G+)(I-)	200	20	19203	17562.9	20772.3
C(G+)(I+)	220	20	43.4	6.49	2.95	0.198	35.8	1.79447	0.618664		C(G+)(I-)	200	20	19236	17595.9	20930.9
C(G-)(I+)	220	20	45.3	6.76	3.42	0.227	35.6	1.79073	0.589404		C(G-)(I-)	200	20	19076	17474.5	20857.6
S(G-)(I-)	220	40	47.1	6.79	2.67	0.203	28.6049	1.72994	0.455491		C(G-)(I-)	200	20	19075	17473.5	20816.5
S(G+)(I-)	220	40	47.9	6.5	2.27	0.207	32.6944	1.62839	0.511917		C(G-)(I-)	200	20	18834	17232.5	20530.9
S(G-)(I+)	220	40	47.1	6.17	2.18	0.209	33.1852	1.57197	0.528427		C(G+)(I+)	200	20	18819	17312.9	20795.9
S(G+)(I+)	220	40	47.4	6.32	3.04	0.271	31.6668	1.6	0.501057		C(G+)(I+)	200	20	18897	17390.9	20876.8
C(G+)(I-)	220	40	45.8	6.44	3.58	0.198	32.9	1.68734	0.538755		C(G+)(I+)	200	20	18454	16947.9	20268.7
C(G-)(I-)	220	40	48.1	6.8	3.29	0.202	30.4	1.69647	0.474012		C(G-)(I+)	200	20	18931	17400.9	20541
C(G+)(I+)	220	40	46.7	6.04	3.07	0.184	32.4	1.55203	0.520343		C(G-)(I+)	200	20	19005	17474.9	20543.3
C(G-)(I+)	220	40	48	6.57	3.53	0.217	31.7	1.6425	0.495312		C(G-)(I+)	200	20	19024	17493.9	20569.5
S(G-)(I-)	220	60	47.3	6.77	2.46	0.201	29.059	1.71755	0.460766		S(G-)(I-)	200	40	18920	17617.8	21325.2
S(G+)(I-)	220	60	48.2	6.39	2.11	0.217	30.1244	1.59087	0.468741		S(G-)(I-)	200	40	18889	17586.8	21104.1
S(G-)(I+)	220	60	45.9	5.84	1.89	0.206	34.6836	1.5268	0.566726		S(G-)(I-)	200	40	18647	17344.8	20911.9
S(G+)(I+)	220	60	47	6.23	3.16	0.188	32.5173	1.59064	0.518893		S(G+)(I-)	200	40	18052	16528.9	19705.7
C(G+)(I-)	220	60	47.1	6.48	3.82	0.209	31.9	1.65096	0.507962		S(G+)(I-)	200	40	18425	16901.9	19988.4
C(G-)(I-)	220	60	49.3	6.76	3.4	0.192	29.5	1.64544	0.448783		S(G+)(I-)	200	40	18338	16814.9	19817.8
C(G+)(I+)	220	60	45.1	5.97	3.46	0.188	32.8	1.58847	0.545455		S(G-)(I+)	200	40	18401	16881.4	20338.8
C(G-)(I+)	220	60	48.7	6.55	3.41	0.187	31.2	1.61396	0.480493		S(G-)(I+)	200	40	18657	17137.4	20519.4
S(G-)(I-)	240	20	44.2	6.33	2.36	0.221	35.3386	1.71855	0.599637		S(G-)(I+)	200	40	18783	17263.4	20483.9
S(G+)(I-)	240	20	43.1	6.15	2	0.206	39.4129	1.7123	0.685839		S(G+)(I+)	200	40	18678	17523	20371
S(G-)(I+)	240	20	45.9	6.1	2.72	0.233	34.6482	1.59477	0.566147		S(G+)(I+)	200	40	19209	18054	21060.3
S(G+)(I+)	240	20	45.8	6.45	2.72	0.233	34.1584	1.68996	0.559362		S(G+)(I+)	200	40	19140	17985	20837.8
C(G+)(I-)	240	20	48.6	6.15	3.21	0.201	30.8482	1.51852	0.476053		C(G+)(I-)	200	40	18956	17421.6	20651.4
C(G-)(I-)	240	20	44.9	6.36	2.95	0.2	33.3153	1.69978	0.556492		C(G+)(I-)	200	40	19131	17596.6	20720
C(G+)(I+)	240	20	49.1	6.02	2.54	0.199	28.8142	1.47128	0.440135		C(G+)(I-)	200	40	19323	17788.6	20864.8
C(G-)(I+)	240	20	51.5	6.47	2.71	0.214	28.4931	1.50757	0.414948		C(G-)(I-)	200	40	19240	17665.1	21111.4
S(G-)(I-)	240	40	47.2	6.32	2.58	0.179	30.8563	1.60678	0.490301		C(G-)(I-)	200	40	19245	17670.1	21074.1
S(G+)(I-)	240	40	49	6.28	2.22	0.204	32.4496	1.53796	0.496677		C(G-)(I-)	200	40	19256	17681.1	21056.6
S(G-)(I+)	240	40	49.5	6.02	3.32	0.195	29.075	1.45939	0.44053		C(G+)(I+)	200	40	19122	17588.4	21101
S(G+)(I+)	240	40	42.7	5.11	3.13	0.251	37.2098	1.43607	0.653568		C(G+)(I+)	200	40	19200	17666.4	21314.4
C(G+)(I-)	240	40	48.7	6.06	3.29	0.203	30.6859	1.49322	0.472576		C(G+)(I+)	200	40	19195	17661.4	21401
C(G-)(I-)	240	40	45.5	6.39	2.68	0.205	33.7543	1.68527	0.55639		C(G-)(I+)	200	40	19630	18107.1	21271
C(G+)(I+)	240	40	50.2	5.66	2.58	0.191	27.1509	1.35299	0.405641		C(G-)(I+)	200	40	19590	18067.1	21251.3
C(G-)(I+)	240	40	52.2	6.2	2.62	0.194	28.0823	1.42529	0.403482		C(G-)(I+)	200	40	19007	17484.1	20560.3
S(G-)(I-)	240	60	50.1	5.47	2.86	0.163	23.6666	1.31018	0.354291		S(G-)(I-)	200	60	18527.9	17300.3	21236.5
S(G+)(I-)	240	60	52.6	4.92	2.64	0.232	24.3482	1.12243	0.34717		S(G-)(I-)	200	60	18541	17313.4	21049.2
S(G-)(I+)	240	60	55.2	4.26	3.95	0.23	22.46	0.926087	0.305163		S(G-)(I-)	200	60	18763	17535.4	21172.5
S(G+)(I+)	240	60	47.2	3.52	3.48	0.131	32.0758	0.894915	0.50968		S(G+)(I-)	200	60	19379	17845.3	21046.3
C(G+)(I-)	240	60	47.9	6.06	2.49	0.204	32.5804	1.51816	0.510131		S(G+)(I-)	200	60	19240	17706.3	20938.9
C(G-)(I-)	240	60	44.9	6.29	2.48	0.201	34.2733	1.68107	0.572494		S(G+)(I-)	200	60	19161	17627.3	20697.8
C(G+)(I+)	240	60	38.1	4.66	2.07	0.15	42.1107	1.46772	0.82895		S(G-)(I+)	200	60	19170	17677.4	21149.8
C(G-)(I+)	240	60	51.1	6.25	2.78	0.204	28.5795	1.46771	0.419465		S(G-)(I+)	200	60	19109	17616.4	21007
S(G-)(I-)	260	20	44.6	6.39	2.33	0.208	33.1051	1.71928	0.5567		S(G-)(I+)	200	60	19064	17571.4	20814.5
S(G+)(I-)	260	20	47.8	6.45	3.06	0.212	32.6	1.61925	0.511506		S(G+)(I+)	200	60	19042	17755.6	20854.3
S(G-)(I+)	260	20	48.9	6.26	3.17	0.226	30.5416	1.5362	0.468429		S(G+)(I+)	200	60	19269	17982.6	21130.2
S(G+)(I+)	260	20	47.8	6.45	3.06	0.194	32.0536	1.61925	0.502934		S(G+)(I+)	200	60	19156	17869.6	20867.3
C(G+)(I-)	260	20	48.4	6.75	2.45	0.221	32.4535	1.67355	0.502895		C(G+)(I-)	200	60	19165	17583.2	20584.8
C(G-)(I-)	260	20	44.5	6.82	2.56	0.201	35.0162	1.8391	0.59016		C(G+)(I-)	200	60	19446	17864.2	20932
C(G+)(I+)	260	20	43.7	5.66	2.32	0.215	36.2053	1.55423	0.621372		C(G+)(I-)	200	60	19452	17870.2	20955.5
C(G-)(I+)	260	20	50.7	6.87	2.81	0.2	29.8093	1.62604	0.440966		C(G-)(I-)	200	60	19540	17966.5	21333.2
S(G-)(I-)	260	40	52.8	4.45	3.28	0.233	23.269	1.01136	0.330526		C(G-)(I-)	200	60	19315	17741.5	21019.1
S(G+)(I-)	260	40	55.1	4.22	2.88	0.168	25.3837	0.919056	0.345513		C(G-)(I-)	200	60	19116	17542.5	20854.2
S(G-)(I+)	260	40	53.6	4.8	3.76	0.227	23.1121	1.07463	0.323396		C(G+)(I+)	200	60	19086	17572.4	21037.7
S(G+)(I+)	260	40	53.1	4.63	3.92	0.166	24.6531	1.04633	0.348208		C(G+)(I+)	200	60	19397	17883.4	21684.3
C(G+)(I-)	260	40	54.1	4.37	3.03	0.212	26.2604	0.969316	0.364053		C(G+)(I+)	200	60	18757	17243.4	20623.2
C(G-)(I-)	260	40	46.4	4.25	3.79	0.21	33.1804	1.09914	0.536321		C(G-)(I+)	200	60	19606	18100.7	21255.5
C(G+)(I+)	260	40	51.3	4.49	2.93	0.193	24.4388	1.05029	0.357293		C(G-)(I+)	200	60	19532	18026.7	21054.4
C(G-)(I+)	260	40	57.6	5.2	3.14	0.184	21.5263	1.08333	0.28029		C(G-)(I+)	200	60	19442	17936.7	20861.8
S(G-)(I-)	260	60	45.4	4.68	2.75	0.201	28.3565	1.237	0.468445		S(G-)(I-)	220	20	18228	16711.8	20887.9
S(G+)(I-)	260	60	52.5	4.89	2.88	0.222	25.0968	1.11771	0.358525		S(G-)(I-)	220	20	18610	17093.8	21307.7
S(G-)(I+)	260	60	53.9	4.68	3.82	0.176	21.4802	1.04193	0.29889		S(G-)(I-)	220	20	18234	16717.8	20690.6
S(G+)(I+)	260	60	55.1	5.03	3.88	0.191	19.6418	1.09546	0.267356		S(G+)(I-)	220	20	19261	17716.3	20986.8
C(G+)(I-)	260	60	48.9	5.26	2.84	0.214	30.5732	1.2908	0.468914		S(G+)(I-)	220	20	19312	17767.3	20902.3
C(G-)(I-)	260	60	48.4	5.43	3.25	0.196	29.1637	1.34628	0.451916		S(G+)(I-)	220	20	19138	17593.3	20835.2
C(G+)(I+)	260	60	48.8	4.49	2.94	0.0659	27.4347	1.1041	0.42164		S(G-)(I+)	220	20	19384	17943.6	21144
C(G-)(I+)	260	60	55.7	6.23	3.05	0.207	22.2683	1.34219	0.299842		S(G-)(I+)	220	20	19254	17813.6	21149.3
S(G-)(I-)	280	20	39.1	3.85	2.72	0.143	38.9	1.18159	0.746164		S(G-)(I+)	220	20	19204	17763.6	21077.7
S(G+)(I-)	280	20	46.1	6.16	2.73	0.161	33.7	1.60347	0.548265		S(G+)(I+)	220	20	19305	17805	21335.1
S(G-)(I+)	280	20	44.9	5.86	3	0.176	34	1.56615	0.567929		S(G+)(I+)	220	20	19242	17742	21097.9
S(G+)(I+)	280	20	45.6	6	3.18	0.185	32.9	1.57895	0.541118		S(G+)(I+)	220	20	19044	17544	21013.8
C(G+)(I-)	280	20	50.7	6.09	3.72	0.169	27.1	1.44142	0.400888		C(G+)(I-)	220	20	18736	17099.7	20351.3
C(G-)(I-)	280	20	47.9	5.32	3.56	0.201	29.7	1.33278	0.465031		C(G+)(I-)	220	20	18538	16901.7	20146
C(G+)(I+)	280	20	50	5.12	3.43	0.18	26.9	1.2288	0.4035		C(G+)(I-)	220	20	18385	16748.7	19973.2
C(G-)(I+)	280	20	51.9	5.88	3.96	0.192	26.8	1.35954	0.387283		C(G-)(I-)	220	20	17986	16310.9	19668.6
S(G-)(I-)	280	40	39.3	3.59	2.7	0.171	34.8	1.09618	0.664122		C(G-)(I-)	220	20	18635	16959.9	20225.3
S(G+)(I-)	280	40	45.8	4.57	3.13	0.167	31.3	1.19738	0.512555		C(G-)(I-)	220	20	18422	16746.9	20006.3
S(G-)(I+)	280	40	49.6	4.59	3.49	0.189	25.8	1.11048	0.390121		C(G+)(I+)	220	20	18373	16849	20366.8
S(G+)(I+)	280	40	44.9	4.09	3.47	0.205	30.5	1.0931	0.509465		C(G+)(I+)	220	20	18587	17063	20619.5
C(G+)(I-)	280	40	49.5	5.65	3.86	0.168	28.9	1.3697	0.437879		C(G+)(I+)	220	20	18324	16800	20184.2
C(G-)(I-)	280	40	51.4	6.01	3.69	0.188	25.6	1.40311	0.373541		C(G-)(I+)	220	20	18922	17343.2	20401.4
C(G+)(I+)	280	40	49.2	5.25	3.83	0.185	25.8	1.28049	0.393293		C(G-)(I+)	220	20	18698	17119.2	20094.7
C(G-)(I+)	280	40	51.8	5.52	3.83	0.198	26.6	1.27876	0.385135		C(G-)(I+)	220	20	18260	16681.2	19625.7
S(G-)(I-)	280	60	46.8	3.23	3.33	0.172	25.8	0.828205	0.413462		S(G-)(I-)	220	40	18287	16705.2	20591.3
S(G+)(I-)	280	60	49.6	4.4	3.36	0.183	26.7	1.06452	0.40373		S(G-)(I-)	220	40	18671	17089.2	21546.9
S(G-)(I+)	280	60	47.8	4.17	3.5	0.223	27.6	1.04686	0.433054		S(G-)(I-)	220	40	18748	17166.2	21286.4
S(G+)(I+)	280	60	50.2	4.31	3.79	0.178	24.3	1.03028	0.363048		S(G+)(I-)	220	40	19596	18076.5	21462.5
C(G+)(I-)	280	60	54.2	4.87	4.11	0.19	22.5	1.07823	0.311347		S(G+)(I-)	220	40	19359	17839.5	21030.3
C(G-)(I-)	280	60	55.7	5.3	3.9	0.194	19.7	1.14183	0.26526		S(G+)(I-)	220	40	19460	17940.5	21215.7
C(G+)(I+)	280	60	56.8	4.35	4.23	0.197	14.9	0.919014	0.196743		S(G-)(I+)	220	40	19456	18012.8	21387.7
C(G-)(I+)	280	60	54.2	4.61	4.27	0.202	21.5	1.02066	0.297509		S(G-)(I+)	220	40	19420	17976.8	21351.2
S(G-)(I-)	300	20	46.6	4.46	3.24	0.154	25	1.1485	0.402361		S(G-)(I+)	220	40	19402	17958.8	21328.7
S(G+)(I-)	300	20	46.7	4.2	3.15	0.169	30.6	1.07923	0.491435		S(G+)(I+)	220	40	19412	17950.9	21556.9
S(G-)(I+)	300	20	50.8	4.95	3.6	0.22	24.3	1.16929	0.35876		S(G+)(I+)	220	40	19458	17996.9	21509.4
S(G+)(I+)	300	20	49.2	4.69	3.34	0.201	26.7	1.1439	0.407012		S(G+)(I+)	220	40	19317	17855.9	21244.7
C(G+)(I-)	300	20	52.9	5.04	3.8	0.196	24.4	1.14329	0.345936		C(G+)(I-)	220	40	19258	17756.6	21191.1
C(G-)(I-)	300	20	53.5	5.57	3.68	0.183	22.2	1.24935	0.311215		C(G+)(I-)	220	40	19049	17547.6	20993.7
C(G+)(I+)	300	20	50.8	4.43	3.88	0.189	24.8	1.04646	0.366142		C(G+)(I-)	220	40	19020	17518.6	21017.3
C(G-)(I+)	300	20	54.1	5.06	3.84	0.202	23.1	1.12237	0.32024		C(G-)(I-)	220	40	19086	17507.9	21051.5
S(G-)(I-)	300	40	48.8	4.15	3.68	0.155	22.4	1.02049	0.344262		C(G-)(I-)	220	40	19736	18157.9	21791.9
S(G+)(I-)	300	40	48.1	3.92	3.24	0.173	27.6	0.977963	0.430353		C(G-)(I-)	220	40	19656	18077.9	21551.8
S(G-)(I+)	300	40	50.3	4.23	3.73	0.233	24	1.00915	0.357853		C(G+)(I+)	220	40	19456	18047.2	21631.3
S(G+)(I+)	300	40	49.1	4.09	3.69	0.22	25.8	0.999593	0.394094		C(G+)(I+)	220	40	19528	18119.2	21685.2
C(G+)(I-)	300	40	54.9	4.94	4.35	0.184	20.7	1.07978	0.282787		C(G+)(I+)	220	40	19658	18249.2	21875
C(G-)(I-)	300	40	55.8	4.99	3.58	0.187	19.1	1.07312	0.25672		C(G-)(I+)	220	40	19142	17627.8	20860.4
C(G+)(I+)	300	40	41.9	3.35	3.42	0.209	33.3	0.959427	0.596062		C(G-)(I+)	220	40	19540	18025.8	21300.3
C(G-)(I+)	300	40	55.8	4.67	4.28	0.21	19.4	1.0043	0.260753		C(G-)(I+)	220	40	19770	18255.8	21503.9
S(G-)(I-)	300	60	41.1	3.2	3.06	0.158	32.1	0.934307	0.585766		S(G-)(I-)	220	60	18054	16494.9	20829.9
S(G+)(I-)	300	60	49.7	4.24	3.39	0.175	26.3	1.02374	0.396881		S(G-)(I-)	220	60	18525	16965.9	21208.1
S(G-)(I+)	300	60	48.7	4.05	3.57	0.213	26.2	0.997947	0.403491		S(G-)(I-)	220	60	18557	16997.9	20576.8
S(G+)(I+)	300	60	54	3.84	4.56	0.226	20.4	0.853333	0.283333		S(G+)(I-)	220	60	19658	18179.9	21962.8
C(G+)(I-)	300	60	52	4.38	3.93	0.185	25.7	1.01077	0.370673		S(G+)(I-)	220	60	19394	17915.9	21780.6
C(G-)(I-)	300	60	57	4.96	3.16	0.221	18.4	1.04421	0.242105		S(G+)(I-)	220	60	19248	17769.9	21484
C(G+)(I+)	300	60	46.4	3.77	3.71	0.188	28.3	0.975	0.457435		S(G-)(I+)	220	60	19759	18353	21834.4
C(G-)(I+)	300	60	52.1	4.26	3.79	0.2	24.8	0.98119	0.357006		S(G-)(I+)	220	60	19373	17967	21425.9
											S(G-)(I+)	220	60	19249	17843	21258.8
											S(G+)(I+)	220	60	19753	18267.6	21865.6
											S(G+)(I+)	220	60	19514	18028.6	21483.6
											S(G+)(I+)	220	60	19293	17807.6	21157.3
											C(G+)(I-)	220	60	19689	18166.4	21542.3
											C(G+)(I-)	220	60	19846	18323.4	21734.6
											C(G+)(I-)	220	60	19537	18014.4	21371.2
											C(G-)(I-)	220	60	19718	18137.6	21618.8
											C(G-)(I-)	220	60	19842	18261.6	22064
											C(G-)(I-)	220	60	19654	18073.6	21449.8
											C(G+)(I+)	220	60	19457	18050.6	21983
											C(G+)(I+)	220	60	19710	18303.6	22047.3
											C(G+)(I+)	220	60	19101	17694.6	21340.1
											C(G-)(I+)	220	60	19953	18423.7	21764.4
											C(G-)(I+)	220	60	19559	18029.7	21300.3
											C(G-)(I+)	220	60	20110	18580.7	21817.1
											S(G-)(I-)	240	20	18368	16845.8	20435.8
											S(G-)(I-)	240	20	18227	16704.8	20145.3
											S(G-)(I-)	240	20	18553	17030.8	20330.2
											S(G+)(I-)	240	20	19177	17693.5	20844.5
											S(G+)(I-)	240	20	19106	17622.5	20534.3
											S(G+)(I-)	240	20	19054	17570.5	20431.4
											S(G-)(I+)	240	20	19203	17729.9	20998.6
											S(G-)(I+)	240	20	18941	17467.9	20701.4
											S(G-)(I+)	240	20	19001	17527.9	20667.1
											S(G+)(I+)	240	20	19141	17594.4	21275.6
											S(G+)(I+)	240	20	19099	17552.4	20981.6
											S(G+)(I+)	240	20	19080	17533.4	20743.9
											C(G+)(I-)	240	20	19913	18478.5	21997.2
											C(G+)(I-)	240	20	19995	18560.5	21958.8
											C(G+)(I-)	240	20	19956	18521.5	21815
											C(G-)(I-)	240	20	19772	18288.7	21951.3
											C(G-)(I-)	240	20	20001	18517.7	22245.7
											C(G-)(I-)	240	20	19928	18444.7	22120.7
											C(G+)(I+)	240	20	20030	18621	22795.9
											C(G+)(I+)	240	20	20193	18784	22782.1
											C(G+)(I+)	240	20	20091	18682	22586
											C(G-)(I+)	240	20	20633	19130.6	22762.1
											C(G-)(I+)	240	20	20376	18873.6	22278.9
											C(G-)(I+)	240	20	20121	18618.6	21934.4
											S(G-)(I-)	240	40	18899	17393.2	21348.6
											S(G-)(I-)	240	40	19450	17944.2	21536
											S(G-)(I-)	240	40	19220	17714.2	21407.2
											S(G+)(I-)	240	40	20182	18684.9	22102
											S(G+)(I-)	240	40	19884	18386.9	21445.8
											S(G+)(I-)	240	40	19758	18260.9	21290.5
											S(G-)(I+)	240	40	19801	18359.7	22099.5
											S(G-)(I+)	240	40	19864	18422.7	21890.7
											S(G-)(I+)	240	40	19485	18043.7	21463.7
											S(G+)(I+)	240	40	20074	18829.6	22324.1
											S(G+)(I+)	240	40	19711	18466.6	21705.2
											S(G+)(I+)	240	40	20182	18937.6	22291
											C(G+)(I-)	240	40	20347	18936.6	22355.9
											C(G+)(I-)	240	40	20125	18714.6	22136.4
											C(G+)(I-)	240	40	19908	18497.6	21908.3
											C(G-)(I-)	240	40	20394	18913.2	22505.3
											C(G-)(I-)	240	40	19896	18415.2	21932.3
											C(G-)(I-)	240	40	20177	18696.2	22233.9
											C(G+)(I+)	240	40	20898	19571.5	23849.3
											C(G+)(I+)	240	40	20533	19206.5	23424.8
											C(G+)(I+)	240	40	20619	19292.5	23447.4
											C(G-)(I+)	240	40	21162	19716.6	23231.8
											C(G-)(I+)	240	40	20683	19237.6	22579.8
											C(G-)(I+)	240	40	20604	19158.6	22567.2
											S(G-)(I-)	240	60	18914	17612.2	22139.2
											S(G-)(I-)	240	60	19246	17944.2	22496.8
											S(G-)(I-)	240	60	19115	17813.2	22655.4
											S(G+)(I-)	240	60	20217	19025.3	23500
											S(G+)(I-)	240	60	20222	19030.3	23464
											S(G+)(I-)	240	60	20174	18982.3	22070.9
											S(G-)(I+)	240	60	20658	19576	23461
											S(G-)(I+)	240	60	20560	19478	23124.2
											S(G-)(I+)	240	60	20547	19465	23126.5
											S(G+)(I+)	240	60	20519	19606	23261.1
											S(G+)(I+)	240	60	20361	19448	22934
											S(G+)(I+)	240	60	20344	19431	23107.1
											C(G+)(I-)	240	60	20600	19152	22735.7
											C(G+)(I-)	240	60	20400	18952	22448.1
											C(G+)(I-)	240	60	20117	18669	21924.7
											C(G-)(I-)	240	60	20306	18809.4	22547.1
											C(G-)(I-)	240	60	20207	18710.4	22363.6
											C(G-)(I-)	240	60	20120	18623.4	22328.4
											C(G+)(I+)	240	60	20067	18923.9	22548.7
											C(G+)(I+)	240	60	23630	22486.9	26514.4
											C(G+)(I+)	240	60	20305	19161.9	22984.4
											C(G-)(I+)	240	60	20724	19238.7	22840.2
											C(G-)(I+)	240	60	20892	19406.7	23031.5
											C(G-)(I+)	240	60	20651	19165.7	22729.7
											S(G-)(I-)	260	20	18872	17350.3	21574.9
											S(G-)(I-)	260	20	18919	17397.3	21061
											S(G-)(I-)	260	20	19049	17527.3	21327.9
											S(G+)(I-)	260	20	19663	18122.2	21453
											S(G+)(I-)	260	20	19299	17758.2	20845.1
											S(G+)(I-)	260	20	19429	17888.2	21053.7
											S(G-)(I+)	260	20	19859	18362.3	21750.3
											S(G-)(I+)	260	20	19384	17887.3	21358.2
											S(G-)(I+)	260	20	19579	18082.3	21413
											S(G+)(I+)	260	20	19743	18204.9	21784.6
											S(G+)(I+)	260	20	19743	18204.9	21508.1
											S(G+)(I+)	260	20	19582	18043.9	21381.7
											C(G+)(I-)	260	20	19273	17686.4	20893.6
											C(G+)(I-)	260	20	19240	17653.4	20915.3
											C(G+)(I-)	260	20	19554	17967.4	21297.6
											C(G-)(I-)	260	20	19487	17884.2	21496.1
											C(G-)(I-)	260	20	19262	17659.2	21130.9
											C(G-)(I-)	260	20	19340	17737.2	21174.2
											C(G+)(I+)	260	20	19516	18169.6	22016.9
											C(G+)(I+)	260	20	19321	17974.6	21453.8
											C(G+)(I+)	260	20	19191	17844.6	21175.8
											C(G-)(I+)	260	20	20062	18454.3	21836.4
											C(G-)(I+)	260	20	19813	18205.3	21497.8
											C(G-)(I+)	260	20	19756	18148.3	21427.2
											S(G-)(I-)	260	40	19650	18553.4	22972.5
											S(G-)(I-)	260	40	19775	18678.4	22605.5
											S(G-)(I-)	260	40	19825	18728.4	22701.9
											S(G+)(I-)	260	40	20679	19628.5	23071.1
											S(G+)(I-)	260	40	21012	19961.5	23291.9
											S(G+)(I-)	260	40	20547	19496.5	22687.5
											S(G-)(I+)	260	40	20698	19499.5	23493.7
											S(G-)(I+)	260	40	20912	19713.5	23910.3
											S(G-)(I+)	260	40	20550	19351.5	23419.2
											S(G+)(I+)	260	40	21208	20039.8	23879.1
											S(G+)(I+)	260	40	20877	19708.8	23508.4
											S(G+)(I+)	260	40	20921	19752.8	23993.4
											C(G+)(I-)	260	40	20913	19845.1	23089.3
											C(G+)(I-)	260	40	20810	19742.1	23424.2
											C(G+)(I-)	260	40	20674	19606.1	22733.1
											C(G-)(I-)	260	40	20987	19946.4	23370.9
											C(G-)(I-)	260	40	20792	19751.4	22992.9
											C(G-)(I-)	260	40	20594	19553.4	22840.6
											C(G+)(I+)	260	40	21155	20058.7	24371.5
											C(G+)(I+)	260	40	21212	20115.7	24536
											C(G+)(I+)	260	40	20600	19503.7	24935.8
											C(G-)(I+)	260	40	21739	20490.5	24274.2
											C(G-)(I+)	260	40	21160	19911.5	23410.2
											C(G-)(I+)	260	40	21113	19864.5	23611.9
											S(G-)(I-)	260	60	20323	19172.8	24490
											S(G-)(I-)	260	60	20610	19459.8	24098.3
											S(G-)(I-)	260	60	20519	19368.8	24394
											S(G+)(I-)	260	60	21142	19920.4	24104.9
											S(G+)(I-)	260	60	21116	19894.4	23833.1
											S(G+)(I-)	260	60	21097	19875.4	23804.3
											S(G-)(I+)	260	60	21302	20121	24644.5
											S(G-)(I+)	260	60	20857	19676	23977.9
											S(G-)(I+)	260	60	20862	19681	23895.5
											S(G+)(I+)	260	60	21264	20015	24942
											S(G+)(I+)	260	60	21189	19940	24540.4
											S(G+)(I+)	260	60	21301	20052	24400.9
											C(G+)(I-)	260	60	21124	19862.1	23487.7
											C(G+)(I-)	260	60	21327	20065.1	23652.7
											C(G+)(I-)	260	60	21240	19978.1	23657.1
											C(G-)(I-)	260	60	21105	19805.7	23732.1
											C(G-)(I-)	260	60	20972	19672.7	23579.5
											C(G-)(I-)	260	60	21003	19703.7	23590.3
											C(G+)(I+)	260	60	21270	20165.2	25020.7
											C(G+)(I+)	260	60	21603	20498.2	25099.1
											C(G+)(I+)	260	60	20914	19809.2	24050.7
											C(G-)(I+)	260	60	21950	20480.1	24483
											C(G-)(I+)	260	60	21360	19890.1	23860.9
											C(G-)(I+)	260	60	21816	20346.1	24263.2
											S(G-)(I-)	280	20	19307	18348.4	22039.1
											S(G-)(I-)	280	20	19428	18469.4	22451.3
											S(G-)(I-)	280	20	19371	18412.4	22215.3
											S(G+)(I-)	280	20	20123	18655	22043
											S(G+)(I-)	280	20	20171	18703	22863.5
											S(G+)(I-)	280	20	20196	18728	22070
											S(G-)(I+)	280	20	19992	18591.1	22264.6
											S(G-)(I+)	280	20	20184	18783.1	22313.6
											S(G-)(I+)	280	20	20146	18745.1	22295.7
											S(G+)(I+)	280	20	20427	18998.3	22721.1
											S(G+)(I+)	280	20	20447	19018.3	22829.6
											S(G+)(I+)	280	20	20471	19042.3	22786.6
											C(G+)(I-)	280	20	20770	19329.4	23127.5
											C(G+)(I-)	280	20	21027	19586.4	23403.9
											C(G+)(I-)	280	20	19660	18219.4	21772.2
											C(G-)(I-)	280	20	20928	19655.1	23688.4
											C(G-)(I-)	280	20	20873	19600.1	23469
											C(G-)(I-)	280	20	20823	19550.1	23176.1
											C(G+)(I+)	280	20	21247	20018.2	24624
											C(G+)(I+)	280	20	21064	19835.2	23868.1
											C(G+)(I+)	280	20	20730	19501.2	23492.7
											C(G-)(I+)	280	20	21244	19851.1	23442.8
											C(G-)(I+)	280	20	21246	19853.1	23410.8
											C(G-)(I+)	280	20	21325	19932.1	23405.2
											S(G-)(I-)	280	40	20168	19217.4	24397.2
											S(G-)(I-)	280	40	20614	19663.4	24501.5
											S(G-)(I-)	280	40	20478	19527.4	24269.1
											S(G+)(I-)	280	40	21452	20263.3	24320.1
											S(G+)(I-)	280	40	21499	20310.3	24449.6
											S(G+)(I-)	280	40	21417	20228.3	24384.1
											S(G-)(I+)	280	40	21753	20575.7	25197.6
											S(G-)(I+)	280	40	21721	20543.7	24927.8
											S(G-)(I+)	280	40	21657	20479.7	24847
											S(G+)(I+)	280	40	21713	20649.1	25595.8
											S(G+)(I+)	280	40	21668	20604.1	25086.6
											S(G+)(I+)	280	40	21335	20271.1	24786.7
											C(G+)(I-)	280	40	21398	20058.7	23802.7
											C(G+)(I-)	280	40	21223	19883.7	23515.9
											C(G+)(I-)	280	40	21244	19904.7	23536.4
											C(G-)(I-)	280	40	21287	19867.5	23990.3
											C(G-)(I-)	280	40	20975	19555.5	23391.2
											C(G-)(I-)	280	40	21462	20042.5	23905.7
											C(G+)(I+)	280	40	21766	20513.2	25332.2
											C(G+)(I+)	280	40	21883	20630.2	25584.8
											C(G+)(I+)	280	40	21667	20414.2	24714.8
											C(G-)(I+)	280	40	22110	20796.3	24516.5
											C(G-)(I+)	280	40	21989	20675.3	24370.6
											C(G-)(I+)	280	40	21894	20580.3	24263.9
											S(G-)(I-)	280	60	20015	19145.2	24465.4
											S(G-)(I-)	280	60	20417	19547.2	24504.6
											S(G-)(I-)	280	60	19743	18873.2	23636.6
											S(G+)(I-)	280	60	21537	20416.3	24839.4
											S(G+)(I-)	280	60	21405	20284.3	24385.4
											S(G+)(I-)	280	60	20728	19607.3	23631.2
											S(G-)(I+)	280	60	21852	20763.9	25425.3
											S(G-)(I+)	280	60	21589	20500.9	24918.6
											S(G-)(I+)	280	60	20804	19715.9	23899
											S(G+)(I+)	280	60	21827	20714.3	25684.8
											S(G+)(I+)	280	60	21685	20572.3	25266.1
											S(G+)(I+)	280	60	21463	20350.3	25081.8
											C(G+)(I-)	280	60	22434	21250.2	25621.7
											C(G+)(I-)	280	60	22423	21239.2	25206.7
											C(G+)(I-)	280	60	22490	21306.2	25310.1
											C(G-)(I-)	280	60	22012	20735.8	25247.7
											C(G-)(I-)	280	60	21793	20516.8	24782.2
											C(G-)(I-)	280	60	21876	20599.8	24892
											C(G+)(I+)	280	60	21486	20409	26698.6
											C(G+)(I+)	280	60	22214	21137	26245.6
											C(G+)(I+)	280	60	21894	20817	26178.5
											C(G-)(I+)	280	60	23045	21909.9	26518.6
											C(G-)(I+)	280	60	22796	21660.9	26036.1
											C(G-)(I+)	280	60	21983	20847.9	24928.7
											S(G-)(I-)	300	20	20389	19280.9	25045.2
											S(G-)(I-)	300	20	19528	18419.9	23185.1
											S(G-)(I-)	300	20	20236	19127.9	24694.8
											S(G+)(I-)	300	20	22055	20990.5	25339.4
											S(G+)(I-)	300	20	21458	20393.5	24397.8
											S(G+)(I-)	300	20	21425	20360.5	25895.1
											S(G-)(I+)	300	20	21610	20376.2	25087.8
											S(G-)(I+)	300	20	21418	20184.2	24532.7
											S(G-)(I+)	300	20	21339	20105.2	24463.9
											S(G+)(I+)	300	20	21235	20060.4	24551.7
											S(G+)(I+)	300	20	21224	20049.4	24559.7
											S(G+)(I+)	300	20	21444	20269.4	24657.1
											C(G+)(I-)	300	20	22081	20852.9	24669.6
											C(G+)(I-)	300	20	21986	20757.9	24662.8
											C(G+)(I-)	300	20	22125	20896.9	24856.6
											C(G-)(I-)	300	20	21442	20101.9	24603
											C(G-)(I-)	300	20	21904	20563.9	24784.6
											C(G-)(I-)	300	20	21585	20244.9	24491.2
											C(G+)(I+)	300	20	21746	20645.4	25205.7
											C(G+)(I+)	300	20	21863	20762.4	25242.3
											C(G+)(I+)	300	20	20835	19734.4	24057.3
											C(G-)(I+)	300	20	22012	20761.1	24838.8
											C(G-)(I+)	300	20	22089	20838.1	24777.8
											C(G-)(I+)	300	20	21938	20687.1	24715.3
											S(G-)(I-)	300	40	20479	19398.9	24487.8
											S(G-)(I-)	300	40	21044	19963.9	25807.9
											S(G-)(I-)	300	40	21713	20632.9	25809.7
											S(G+)(I-)	300	40	22379	21339.3	26073.7
											S(G+)(I-)	300	40	22134	21094.3	25489.9
											S(G+)(I-)	300	40	22113	21073.3	25441.4
											S(G-)(I+)	300	40	21765	20657.6	25479.2
											S(G-)(I+)	300	40	21857	20749.6	25359.2
											S(G-)(I+)	300	40	21525	20417.6	24893.4
											S(G+)(I+)	300	40	22182	21110.9	26057.8
											S(G+)(I+)	300	40	22305	21233.9	25957.5
											S(G+)(I+)	300	40	22248	21176.9	25722.9
											C(G+)(I-)	300	40	22466	21257.9	25987.2
											C(G+)(I-)	300	40	22605	21396.9	25605.5
											C(G+)(I-)	300	40	22052	20843.9	24904.3
											C(G-)(I-)	300	40	22169	20945.2	25680.1
											C(G-)(I-)	300	40	22544	21320.2	25913
											C(G-)(I-)	300	40	22505	21281.2	25844.3
											C(G+)(I+)	300	40	22217	21353.7	26496.9
											C(G+)(I+)	300	40	22323	21459.7	26269.4
											C(G+)(I+)	300	40	22144	21280.7	26016.3
											C(G-)(I+)	300	40	20824	19672.9	24057.7
											C(G-)(I+)	300	40	22826	21674.9	26253.5
											C(G-)(I+)	300	40	22400	21248.9	25575.1
											S(G-)(I-)	300	60	20587	19711.4	25104.2
											S(G-)(I-)	300	60	20779	19903.4	25068.1
											S(G-)(I-)	300	60	20311	19435.4	23781.7
											S(G+)(I-)	300	60	21997	20895.6	25332.9
											S(G+)(I-)	300	60	22071	20969.6	25216.2
											S(G+)(I-)	300	60	21868	20766.6	24941.2
											S(G-)(I+)	300	60	21955	20888.2	25680.9
											S(G-)(I+)	300	60	21919	20852.2	25233.4
											S(G-)(I+)	300	60	21848	20781.2	25296.5
											S(G+)(I+)	300	60	22252	21242.6	26259.3
											S(G+)(I+)	300	60	22225	21215.6	25804.9
											S(G+)(I+)	300	60	22223	21213.6	25634.2
											C(G+)(I-)	300	60	22640	21555.2	25666.8
											C(G+)(I-)	300	60	22631	21546.2	25401.1
											C(G+)(I-)	300	60	22367	21282.2	25094.8
											C(G-)(I-)	300	60	22100	20887.1	25383
											C(G-)(I-)	300	60	22134	20921.1	25671.2
											C(G-)(I-)	300	60	21966	20753.1	25281.9
											C(G+)(I+)	300	60	21727	20766.1	25981.8
											C(G+)(I+)	300	60	21922	20961.1	25637.4
											C(G+)(I+)	300	60	21884	20923.1	25590.3
											C(G-)(I+)	300	60	23228	22163.6	26429.6
											C(G-)(I+)	300	60	22750	21685.6	25935.1
											C(G-)(I+)	300	60	22670	21605.6	25840.1
